# Supplementary material for: High-concentration aqueous synthesis of salicylate-based metal–organic frameworks
Source: Royal Society of Chemistry journal article supplement (doi:10.1039/d5ta04800a), 2025-01-01
Supplement: d5ta04800a1.pdf [file d5ta04800a1.pdf]

*Supporting Information for*

**High-Concentration Aqueous Synthesis of Salicylate-Based Metal-Organic Frameworks**

Zayim M. Jamil,<sup>a</sup> Tristan A. Pitt,<sup>a</sup> Clarisse A. Doligon, Ronald T. Jerozal,<sup>a,b</sup> Phillip J. Milner<sup>a,\*</sup>

<sup>a</sup>Department of Chemistry and Chemical Biology, Cornell University, Ithaca, NY, 14850, United States

<sup>b</sup>Department of Chemistry, Hamilton College, Clinton, NY 13323, United States

\*pjm347@cornell.edu

**Table of Contents.**

|                                                                                         |     |
|-----------------------------------------------------------------------------------------|-----|
| 1. General Procedures. ....                                                             | 2   |
| 2. Synthesis of organic linkers. ....                                                   | 4   |
| 2.1. Synthesis of H <sub>4</sub> ( <i>m</i> -dobdc). ....                               | 4   |
| 2.2. Synthesis of H <sub>4</sub> dobpdc. ....                                           | 5   |
| 3. High-concentration aqueous syntheses of M <sub>2</sub> (dobdc) MOFs.....             | 9   |
| 3.1. Mg <sub>2</sub> (dobdc). ....                                                      | 9   |
| 3.2. Co <sub>2</sub> (dobdc). ....                                                      | 17  |
| 3.3. Ni <sub>2</sub> (dobdc). ....                                                      | 24  |
| 3.4. Zn <sub>2</sub> (dobdc). ....                                                      | 31  |
| 4. High-concentration aqueous syntheses of M <sub>2</sub> (dobpdc) MOFs.....            | 38  |
| 4.1. Mg <sub>2</sub> (dobpdc). ....                                                     | 38  |
| 4.2. Co <sub>2</sub> (dobpdc). ....                                                     | 45  |
| 4.3. Ni <sub>2</sub> (dobpdc). ....                                                     | 52  |
| 4.4. Zn <sub>2</sub> (dobpdc). ....                                                     | 59  |
| 5. High-concentration aqueous syntheses of M <sub>2</sub> ( <i>m</i> -dobdc) MOFs. .... | 66  |
| 5.1. Mg <sub>2</sub> ( <i>m</i> -dobdc). ....                                           | 66  |
| 5.2. Co <sub>2</sub> ( <i>m</i> -dobdc). ....                                           | 74  |
| 5.3. Ni <sub>2</sub> ( <i>m</i> -dobdc). ....                                           | 81  |
| 5.4. Zn <sub>2</sub> ( <i>m</i> -dobdc). ....                                           | 89  |
| 6. Crystallographic Analysis. ....                                                      | 98  |
| 7. CO <sub>2</sub> /N <sub>2</sub> Selectivity Calculations. ....                       | 105 |
| 8. Solvothermal Synthesis of Salicylate MOFs.....                                       | 106 |
| 9. Large-Scale Synthesis of Zn <sub>2</sub> ( <i>m</i> -dobdc). ....                    | 120 |
| 10. References.....                                                                     | 123 |

## 1. General Procedures.

All reagents were purchased from commercial vendors and used without further purification unless specified otherwise. The solvents ethanol (EtOH, Fisher, ACS Grade), methanol (MeOH, Fisher, ACS Grade), isopropanol (iPrOH, Fisher, ACS Grade), *N,N*-dimethylformamide (DMF, Fisher, ACS Grade), hydrochloric acid (HCl, Fisher, ACS Grade), 1,4-dioxane (Oakwood Chemical), hydrobromic acid (HBr, Fisher, 33% in acetic acid), glacial acetic acid (EMD Millipore), and dichloromethane (CH<sub>2</sub>Cl<sub>2</sub>, Honeywell, 99.5%) were purchased from commercial vendors. The reagents 2,5-dihydroxyterephthalic acid (H<sub>4</sub>dobdc, Astatech, 95%), resorcinol (AESAR, 99%), potassium bicarbonate (KHCO<sub>3</sub>, Oakwood Chemical, 99%), methyl 5-chloro-2-methoxybenzoate (AESAR, 98%), potassium acetate (KOAc, Aldrich, 99%), bis(pinacolato)diboron (Oakwood Chemical, 99%), potassium carbonate (K<sub>2</sub>CO<sub>3</sub>, Fluka Chemical, anhydrous powder, 325 mesh, 99%), and sodium hydroxide (NaOH, Fisher, pellets) were purchased from commercial vendors. The metal salts Mg(NO<sub>3</sub>)<sub>2</sub>·6H<sub>2</sub>O (Beantown, 98%), Co(NO<sub>3</sub>)<sub>2</sub>·6H<sub>2</sub>O (Aldrich, 98%), Ni(NO<sub>3</sub>)<sub>2</sub>·6H<sub>2</sub>O (Acros, 98%), and Zn(NO<sub>3</sub>)<sub>2</sub>·6H<sub>2</sub>O (Lancaster, 99%) were purchased from commercial vendors and stored in desiccators when not in use. XPhos Pd G3 was synthesized according to the literature procedure.<sup>1</sup> Deuterated dimethyl sulfoxide (DMSO-d<sub>6</sub>, Cambridge Isotope Laboratories, 99%) and deuterated chloroform (CDCl<sub>3</sub>, Cambridge Isotope Laboratories, 99.8%) were purchased from commercial vendors. Cylinders of research grade CO<sub>2</sub> (99.999%) and N<sub>2</sub> (Ultra High Purity, 99.999%) were purchased from Airgas.

Powder X-ray diffraction (PXRD) data were collected on a Bruker D8 Advance ECO or Rigaku Smartlab SE diffractometer equipped with Cu K<sub>α</sub> sources ( $\lambda = 1.5406 \text{ \AA}$ ). Backgrounds were subtracted from PXRD measurements using OriginPro for presentation but were included and modeled in all data analyses. Scanning electron microscopy (SEM) images were taken at 1.0 kV using a Zeiss Gemini 500 scanning electron microscope. The powder samples were immobilized on carbon tape mounted on an aluminum stub. The samples were blown using compressed air to remove excess material not stuck to the tape and then were spin-coated with a Au/Pd layer. Thermogravimetric decomposition profiles were collected on a TA instruments Discovery TGA 550 thermogravimetric analyzer (TGA) using a temperature ramp of 5.00 °C/min from room temperature to 600.00 °C under an atmosphere of N<sub>2</sub> (99.999%). Masses are uncorrected for buoyancy effects. NMR data were collected on Bruker INOVA 500 MHz spectrometers and are referenced to residual solvent. Infrared (IR) spectra were collected on a Bruker Tensor II IR spectrometer equipped with a diamond Attenuated Total Reflectance (ATR) attachment. Surface area data were collected on either a Micromeritics ASAP 2460 or a Micromeritics 3-Flex gas sorption analyzer using ultrapure N<sub>2</sub> (99.999%) and a liquid N<sub>2</sub> bath. Brunauer-Emmett-Teller (BET) surface areas were determined by linear least squares regression analysis using the linearized form of the BET equation. The Rouquerol criteria were used to find the optimal  $P/P_0$  range for calculating BET surface areas. DFT-calculated pore size distributions were determined using a metal oxide surface assuming cylindrical pores.

MOFs were activated with supercritical CO<sub>2</sub> in a Tousimis<sup>TM</sup> Samdri®-PVT-3D critical point dryer. The dried MOF samples were placed inside the dryer and soaked in iPrOH. The sample chamber was then cooled to at least 0 °C. The chamber was then filled with liquid CO<sub>2</sub>. CO<sub>2</sub> was

vented under positive pressure for 5 min. The rate of venting of CO<sub>2</sub> was always kept below the rate of filling to maintain a full drying chamber while keeping the temperature between 0–10 °C. After 5 min, the chamber was filled with CO<sub>2</sub>. The chamber was then sealed, and the temperature was raised to at least 31 °C. Once the chamber pressure was at ~1200 psi (above the critical point of CO<sub>2</sub>), the chamber was slowly bled until the pressure was around 400 psi, and then the chamber was purged.<sup>2</sup>

X-ray photoelectron spectroscopy (XPS) spectra were collected on a Thermo Scientific Nexsa G2 surface analysis system using a monochromatic Al K<sub>α</sub> (1486.6 eV) X-ray source (12 kV, 10 mA). The sample was mounted in a standard Nexsa G2. Survey scan analyses (0–1350 eV) were carried out by using an X-ray beam size of 400 μm and pass energy of 200 eV, dwell time of 10 ms, and energy step size of 1.000 eV.

## 2. Synthesis of organic linkers.

### 2.1. Synthesis of H<sub>4</sub>(*m*-dobdc).

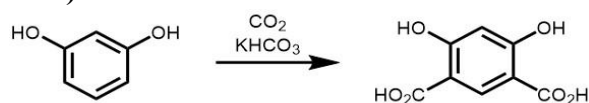

Prepared according to the literature procedure.<sup>3</sup> Resorcinol (5.00 g, 45.2 mmol, 1.00 equiv.) and KHCO<sub>3</sub> (10.5 g, 105 mmol, 2.32 equiv.) were pulverized separately using a mortar and pestle and then thoroughly mixed. The combined solids were sealed in a Parr reactor equipped with a pressure gauge. The Parr reactor was pressurized with CO<sub>2</sub> to 25 bar at room temperature and then vented. This process was repeated a total of three times. The Parr reactor was pressurized with CO<sub>2</sub> to 25 bar at room temperature and sealed. The Parr reactor was then heated to 230 °C (as measured by an external thermocouple) in a sand bath for 18 h and then slowly cooled to room temperature. The pressure was vented, and 1 L of H<sub>2</sub>O was added. The solid in the suspension was broken up mechanically and then by sonication. The resulting suspension was filtered, and the filtrate was acidified with concentrated HCl until the pH of the solution was less than 1, at which time a white solid precipitated from solution. The product was then collected by filtration and recrystallized from hot H<sub>2</sub>O to yield 2,4-dihydroxybenzene-1,5-dicarboxylic acid (H<sub>4</sub>*m*-dobdc, 4.19 g, 47%) as a pale-yellow solid. <sup>1</sup>H NMR (500 MHz, DMSO-*d*<sub>6</sub>): δ 8.30 (s, 1H), 6.42 (s, 1H) ppm (the phenol and carboxylic acid protons could not be observed); <sup>13</sup>C NMR (126 MHz, DMSO-*d*<sub>6</sub>): δ 171.59, 167.00, 134.83, 106.46, 103.70 ppm. These spectra are consistent with those reported in the literature.<sup>3</sup>

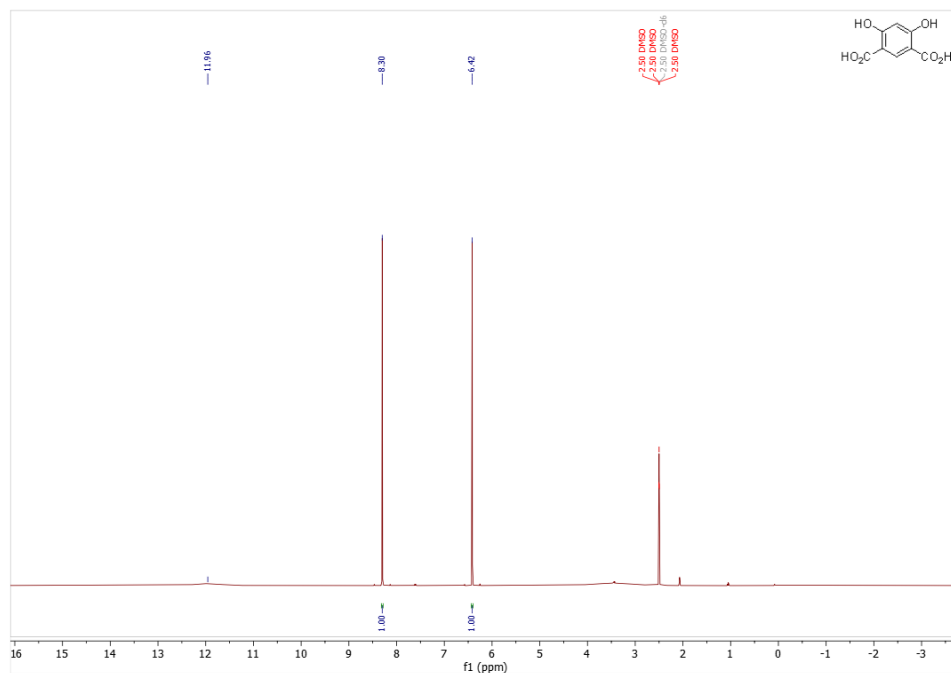

**Figure S1.** <sup>1</sup>H NMR spectrum (500 MHz, DMSO-*d*<sub>6</sub>) of H<sub>4</sub>*m*-dobdc.



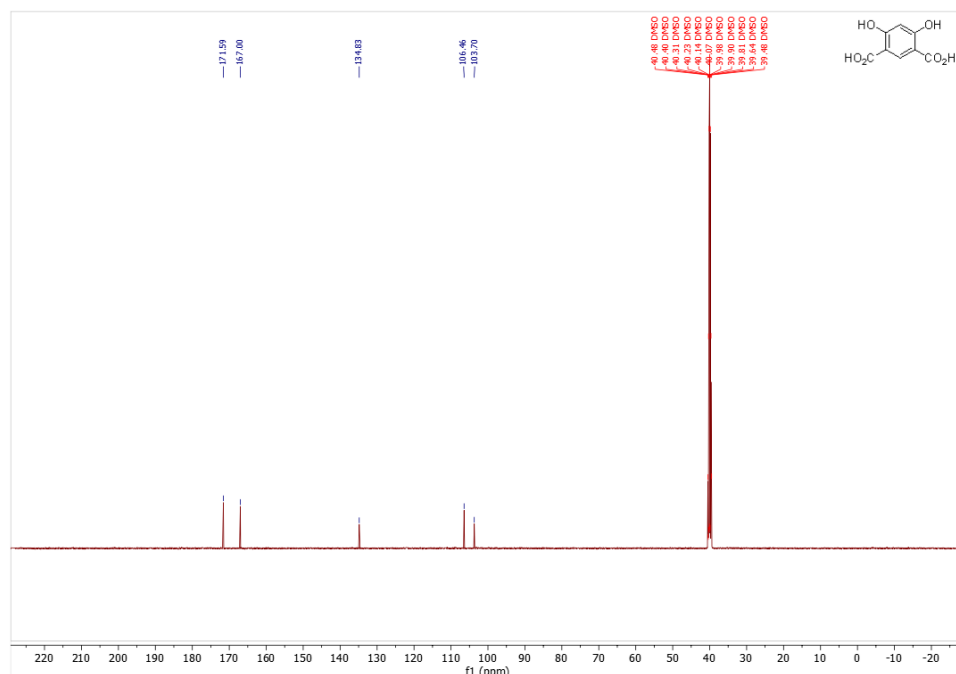

**Figure S2.**  $^{13}\text{C}$  NMR spectrum (126 MHz,  $\text{DMSO-d}_6$ ) of  $\text{H}_4m\text{-dobdc}$ .

## 2.2. Synthesis of $\text{H}_4\text{dobpdc}$ .

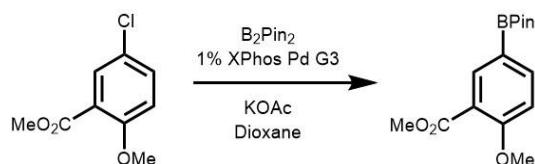

Prepared according to the literature procedure.<sup>4</sup> A 500 mL 3-neck round-bottom flask equipped with a stir bar and reflux condenser was charged with methyl 5-chloro-2-methoxybenzoate (5.44 g, 27.1 mmol, 1.00 equiv.), KOAc (7.981 g, 81.318 mmol, 3.00 equiv.), XPhos Pd G3<sup>3</sup> (229 mg, 0.271 mmol, 1%), and bis(pinacolato)diboron (7.57 g, 29.82 mmol, 1.10 equiv.). The flask was placed under high vacuum and back-filled with  $\text{N}_2$ . This process was repeated a total of three times. Next, freshly degassed 1,4-dioxane (57 mL) was added, and the reaction mixture was stirred at reflux under  $\text{N}_2$  for 24 h. At this time, the reaction mixture was allowed to cool to room temperature and concentrated to yield a black solid.  $\text{CH}_2\text{Cl}_2$  (200 mL) and  $\text{H}_2\text{O}$  (200 mL) were added, and the mixture was vigorously stirred for 5 min to dissolve all solids. The phases were separated, and the aqueous phase was further extracted with  $\text{CH}_2\text{Cl}_2$  ( $2 \times 100$  mL). The combined organic extracts were washed with brine (100 mL), dried over  $\text{Mg}_2\text{SO}_4$ , and filtered through a short plug of celite, eluting with  $\text{CH}_2\text{Cl}_2$ . The solution was concentrated, and the resulting solid was triturated with hexanes and filtered, yielding methyl 5-(pinacalboryl)-2-methoxybenzoate (6.92 g, 87%) as a fluffy white solid.  $^1\text{H}$  NMR (500 MHz,  $\text{CDCl}_3$ ):  $\delta$  8.15 (d,  $J = 1.7$  Hz, 1H), 7.83 (dd,  $J = 8.4, 1.8$  Hz, 1H), 6.89 (d,  $J = 8.4$  Hz, 1H), 3.85 (s, 3H), 3.80 (s, 3H), 1.26 (s, 12H) ppm. This spectrum is consistent with that reported in the literature.<sup>5</sup>

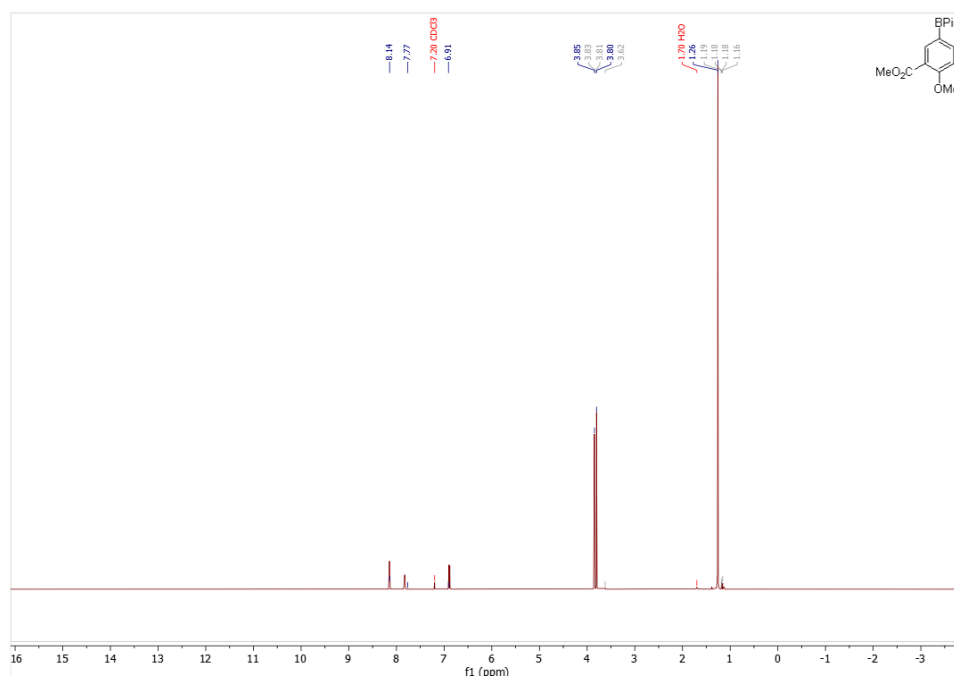

**Figure S3.**  $^1\text{H}$  NMR spectrum (500 MHz,  $\text{CDCl}_3$ ) of methyl 5-(pinacalboryl)-2-methoxybenzoate.

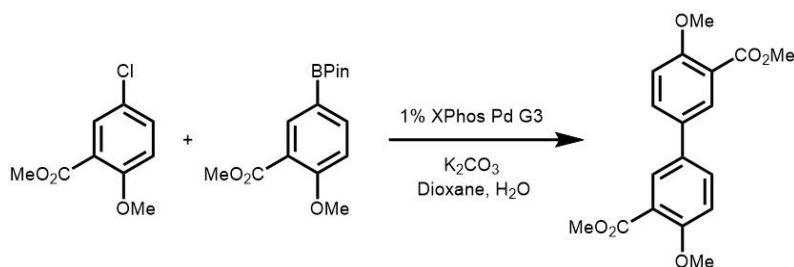

A 500 mL 3-neck round-bottom flask equipped with a stir bar and reflux condenser was charged with methyl 5-chloro-2-methoxybenzoate (4.32 g, 21.5 mmol, 1.00 equiv.), 5-(pinacalboryl)-2-methoxybenzoate (6.92 g, 23.7 mmol, 1.10 equiv.),  $\text{K}_2\text{CO}_3$  (5.95 g, 43.1 mmol, 2.00 equiv.) and XPhos Pd G3 (182 mg, 0.215 mmol, 1 mol %). The flask was placed under high vacuum and back-filled with  $\text{N}_2$ . This process was repeated a total of three times. Next, freshly degassed 1,4-dioxane (43.2 mL) and freshly degassed  $\text{H}_2\text{O}$  (21.6 mL) were added, and the reaction mixture was stirred at reflux under  $\text{N}_2$  for 24 h. At this time, the reaction mixture cooled to room temperature and poured into  $\text{H}_2\text{O}$  (200 mL), resulting in the precipitation of a gray solid from solution. The heterogeneous mixture was filtered, and the resulting solid was washed thoroughly with  $\text{H}_2\text{O}$  (100 mL). The solid was dissolved in  $\text{CH}_2\text{Cl}_2$  (250 mL), dried over  $\text{Mg}_2\text{SO}_4$ , and filtered through a short plug of celite, eluting with  $\text{CH}_2\text{Cl}_2$ . The solution was concentrated, and the resulting solid was triturated with MeOH and filtered, yielding dimethyl 4,4'-dimethoxy-[1,1'-biphenyl]-3,3'-dicarboxylate (5.36 g, 75%) as an off-white solid.  $^1\text{H}$  NMR (500 MHz,  $\text{DMSO}-d_6$ ):  $\delta$  7.87 (d,  $J$  = 2.5 Hz, 1H), 7.83 (dd,  $J$  = 8.7, 2.5 Hz, 1H), 7.24 (d,  $J$  = 8.7 Hz, 1H), 3.87 (s, 3H), 3.82 (s, 3H) ppm. This spectrum is consistent with that reported in the literature.<sup>6</sup>

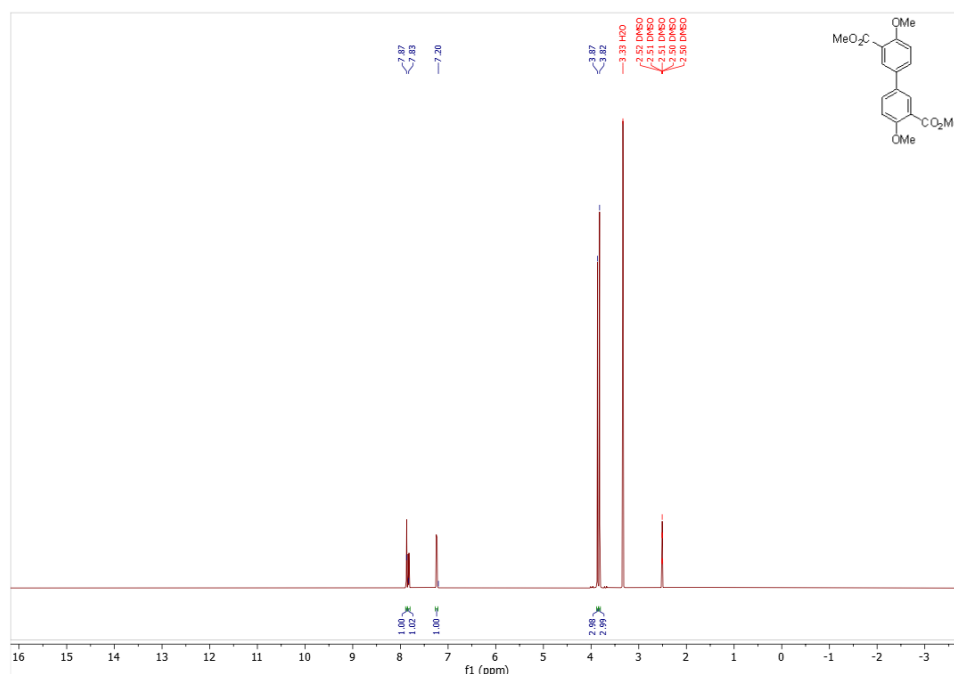

**Figure S4.**  $^1\text{H}$  NMR spectrum (500 MHz,  $\text{DMSO-d}_6$ ) of dimethyl 4,4'-dimethoxy-[1,1'-biphenyl]-3,3'-dicarboxylate.

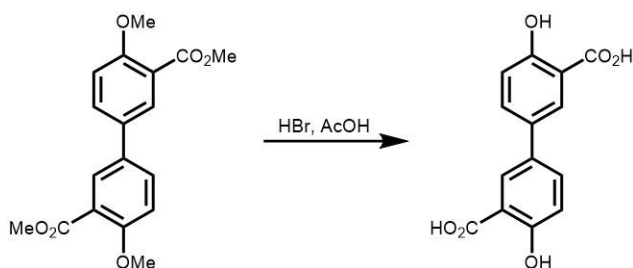

A 500 mL round-bottom flask equipped with a stir bar and reflux condenser was charged with 4,4'-dimethoxy-[1,1'-biphenyl]-3,3'-dicarboxylate (5.36 g, 16.2 mmol, 1.00 equiv.), concentrated HBr (129 mL), and glacial AcOH (129 mL). The reaction mixture was allowed to stir vigorously at reflux for 48 h. At this time, the reaction mixture was allowed to cool to room temperature and poured into  $\text{H}_2\text{O}$  (500 mL), resulting in precipitation of a light-brown solid from solution. The heterogeneous mixture was filtered, and the resulting solid was washed with  $\text{H}_2\text{O}$  (300 mL) and diethyl ether (300 mL), yielding 4,4'-dihydroxy-[1,1'-biphenyl]-3,3'-dicarboxylic acid ( $\text{H}_4\text{dobpdc}$ , 3.02 g, 68%) as a light-brown solid.  $^1\text{H}$  NMR (500 MHz,  $\text{DMSO-d}_6$ ):  $\delta$  7.96 (d,  $J = 2.5$  Hz, 2H), 7.79 (dd,  $J = 8.6, 2.5$  Hz, 2H), 7.04 (d,  $J = 8.6$  Hz, 2H) ppm;  $^{13}\text{C}$  NMR (126 MHz,  $\text{DMSO-d}_6$ ):  $\delta$  172.17, 160.75, 133.96, 130.71, 127.83, 118.35, 113.84 ppm. These spectra are consistent with those reported in the literature.<sup>7</sup>

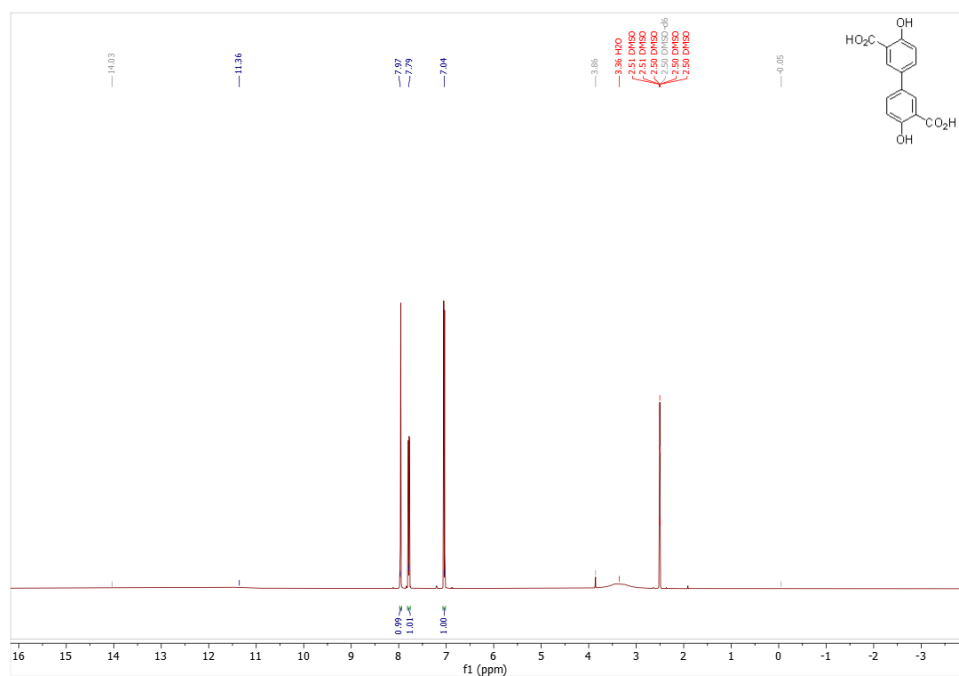

**Figure S5.** <sup>1</sup>H NMR spectrum (500 MHz, DMSO-d<sub>6</sub>) of H<sub>4</sub>dobpdc.

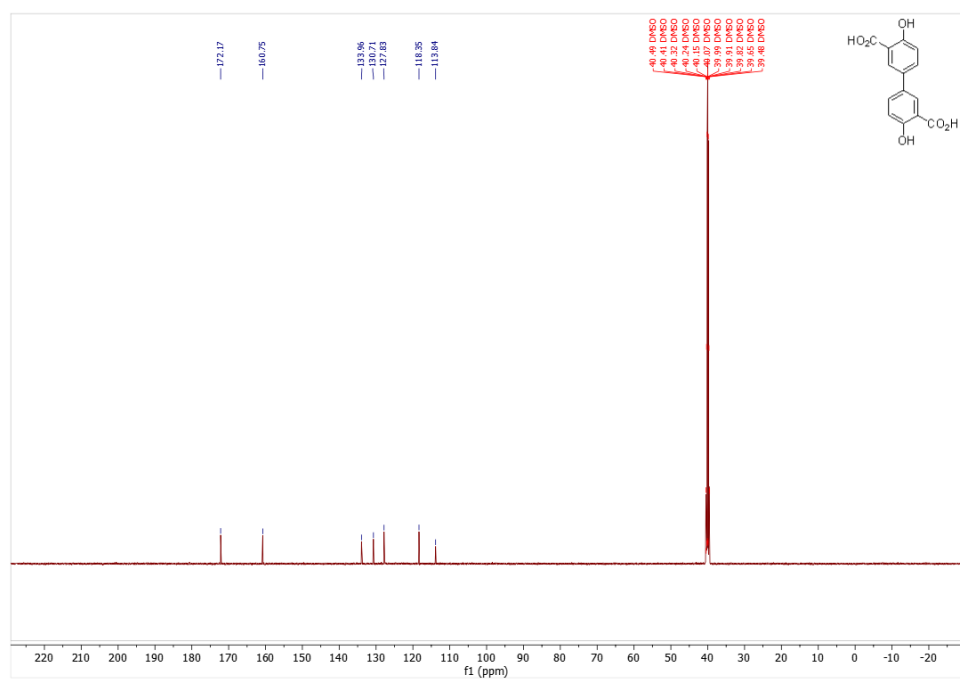

**Figure S6.** <sup>13</sup>C NMR spectrum (126 MHz, DMSO-d<sub>6</sub>) of H<sub>4</sub>dobpdc.

### 3. High-concentration aqueous syntheses of $M_2(\text{dobdc})$ MOFs.

#### 3.1. $Mg_2(\text{dobdc})$ .

Prepared according to a modified literature procedure.<sup>8</sup> In a 20 mL scintillation vial,  $Mg(\text{NO}_3)_2 \cdot 6\text{H}_2\text{O}$  (641 mg, 2.50 mmol, 2.50 equiv.) was dissolved in  $\text{H}_2\text{O}$  (5 mL, 1.0 mL, or 0.5 mL for 0.1 M, 0.5 M, and 1.0 M, respectively). In a separate 20 mL scintillation vial equipped with a stir bar, NaOH (160 mg, 4.00 mmol, 4.00 equiv.),  $\text{H}_4\text{dobdc}$  (198 mg, 1.00 mmol, 1.00 equiv.), and  $\text{H}_2\text{O}$  (5 mL, 1.0 mL, or 0.5 mL for 0.1 M, 0.5 M, and 1.0 M, respectively) were combined. The  $Mg(\text{NO}_3)_2 \cdot \text{H}_2\text{O}$  solution was added all at once to the  $\text{H}_4\text{dobdc}$  solution via a plastic pipette. The mixture was stirred at room temperature for 1 h. The reaction mixture was vacuum-filtered, and the resulting solid was rinsed with MeOH (10–15 mL). The resulting dark-yellow solid was transferred to a new scintillation vial filled with MeOH (10–15 mL). The vial was transferred to an aluminum block on a hot plate that had been pre-heated to 60 °C and was allowed to stand at this temperature for at least 12 h. At this time, the heterogenous mixture was allowed to cool to room temperature, the solvent was decanted, and fresh MeOH (10–15 mL) was added. This process was repeated for a total of six MeOH soaks. After the final soak, the solvent was decanted, and the remaining solid was allowed to dry in air. The sample was then activated using supercritical  $\text{CO}_2$  (See Section 1), yielding activated  $Mg_2(\text{dobdc})$  (42.7%, 74.6%, and 71.5% yield for 0.1 M, 0.5 M, and 1.0 M, respectively) that was immediately transferred to a glass adsorption tube equipped with a Micromeritics *CheckSeal*. The sample was activated on the SmartVac under high vacuum (<10  $\mu\text{bar}$ ), ramping the temperature slowly to 250 °C (0.1 °C/min). The sample was allowed to stand at 250 °C under high vacuum (<10  $\mu\text{bar}$ ) for 12 h prior to gas adsorption analysis.

#### Reaction Temperature Study.

The same procedure as above was followed for the synthesis of  $Mg_2(\text{dobdc})$  at each concentration (0.1 M, 0.5 M, and 1.0 M). Meanwhile, a temperature probe was inserted into the  $\text{H}_4\text{dobdc}/\text{NaOH}$  scintillation vial before adding any  $\text{H}_2\text{O}$ . The temperature was then measured every minute after adding in  $\text{H}_2\text{O}$  and the  $Mg(\text{NO}_3)_2 \cdot \text{H}_2\text{O}$  solution for 10 min. After that, the temperature was measured every 10 min for a total reaction time of 1 h.

**Table S1.** Temperature (°C) vs time at different concentration conditions for the synthesis of  $\text{Mg}_2(\text{dobdc})$ .

| Time (min) | 0.1 M Temp (°C) | 0.5 M Temp (°C) | 1.0 M Temp (°C) |
|------------|-----------------|-----------------|-----------------|
| 0          | 27.4            | 31.8            | 34.2            |
| 1          | 26.0            | 28.5            | 33.0            |
| 2          | 25.3            | 26.2            | 32.1            |
| 3          | 24.9            | 25.1            | 30.2            |
| 4          | 24.7            | 24.2            | 29.4            |
| 5          | 24.6            | 23.5            | 28.8            |
| 6          | 24.4            | 23.2            | 28.2            |
| 7          | 24.1            | 23.0            | 27.6            |
| 8          | 23.9            | 22.8            | 27.1            |
| 9          | 23.8            | 22.5            | 26.8            |
| 10         | 23.8            | 22.3            | 26.2            |
| 20         | 23.4            | 22.1            | 25.0            |
| 30         | 23.2            | 22.0            | 24.1            |
| 40         | 23.1            | 22.0            | 23.1            |
| 50         | 23.0            | 22.0            | 23.1            |
| 60         | 23.0            | 22.0            | 23.1            |

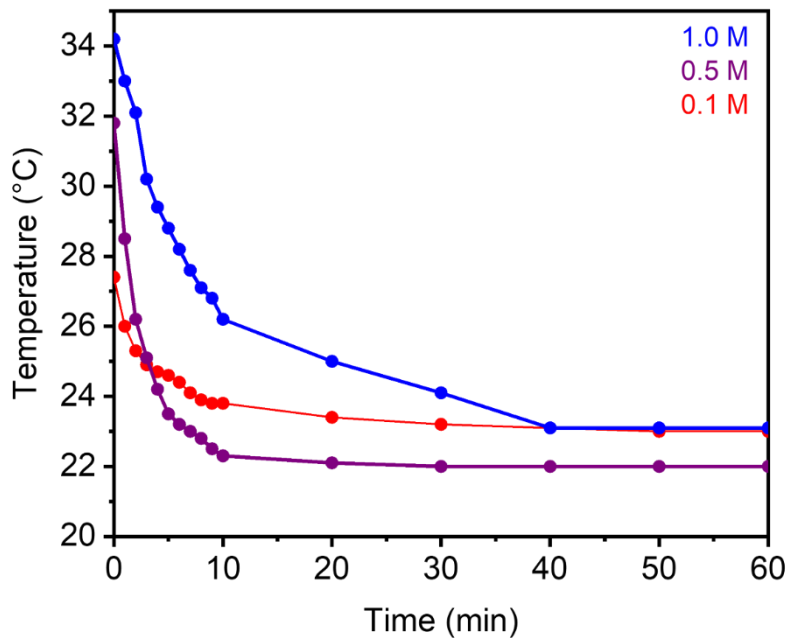

**Figure S7.** Temperature (°C) vs time for the synthesis of  $\text{Mg}_2(\text{dobdc})$  at different concentration conditions. The maximum temperature increase upon mixing increases as a function of the reaction concentration.

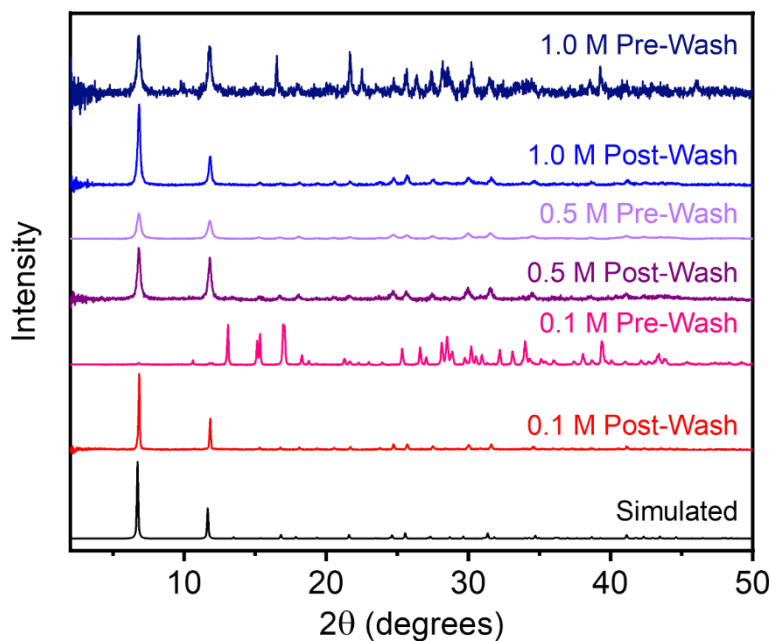

**Figure S8.** Baseline-corrected PXRD patterns ( $\lambda = 1.5406 \text{ \AA}$ ) of  $\text{Mg}_2(\text{dobdc})$  synthesized at different concentrations before (pre-wash) and after (post-wash) soaking in MeOH. The simulated pattern based on the previously reported SCXRD structure of the isostructural framework  $\text{Zn}_2(\text{dobdc})$  is included for reference.<sup>9</sup> While the samples prepared at 0.5 M and 1.0 M consist largely of  $\text{Mg}_2(\text{dobdc})$  before soaking in MeOH, the sample prepared at 0.1 M consists of a different phase or mixture of phases that transforms into phase-pure  $\text{Mg}_2(\text{dobdc})$  upon soaking in MeOH. The powder pattern of this product was reliably indexed, and refined unit cell parameters were determined through Pawley refinement (Figure S140).

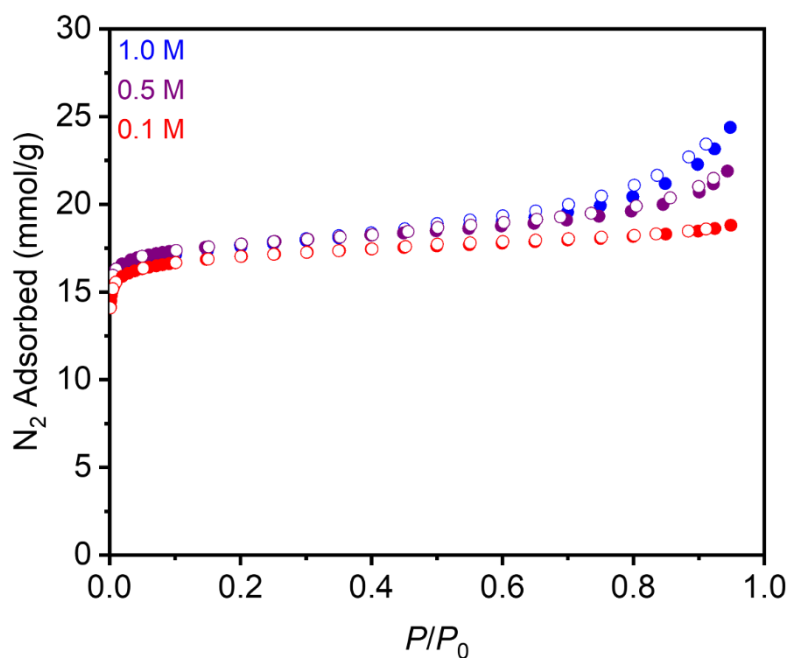

**Figure S9.** 77 K N<sub>2</sub> adsorption (filled circles) and desorption (open circles) isotherms of activated Mg<sub>2</sub>(dobdc) synthesized at different reaction concentrations. The BET surface areas determined from these data are  $1532 \pm 1 \text{ m}^2/\text{g}$  (0.1 M),  $1597 \pm 1 \text{ m}^2/\text{g}$  (0.5 M), and  $1569 \pm 1 \text{ m}^2/\text{g}$  (1.0 M), respectively. The Langmuir surface areas determined from these data are  $1792 \text{ m}^2/\text{g}$  (0.1 M),  $1974 \text{ m}^2/\text{g}$  (0.5 M), and  $2092 \text{ m}^2/\text{g}$  (1.0 M), respectively. The literature BET and Langmuir surface areas of this MOF are  $1800 \text{ m}^2/\text{g}$  and  $2060 \text{ m}^2/\text{g}$ ,<sup>7</sup> respectively.

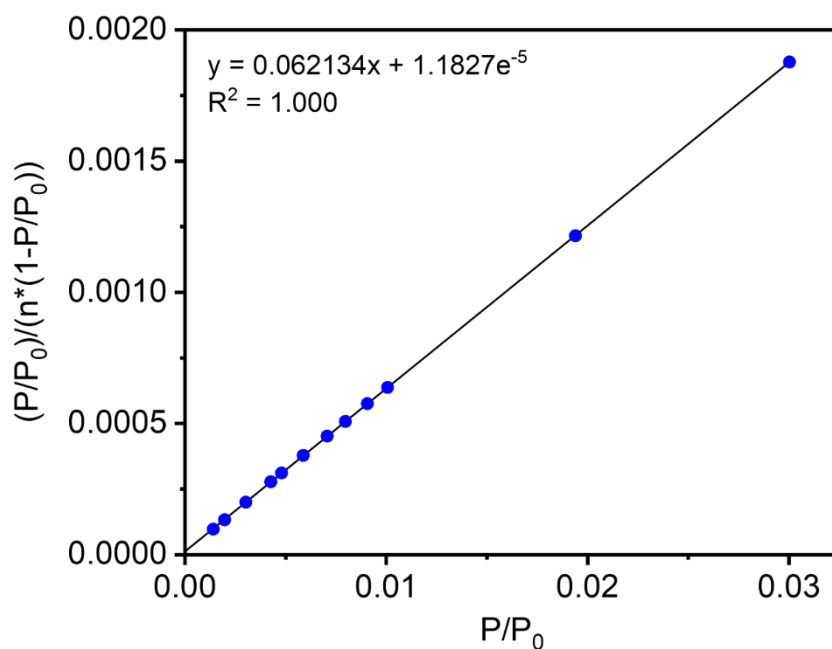

**Figure S10.** Linearized BET plot for the N<sub>2</sub> adsorption data of Mg<sub>2</sub>(dobdc) synthesized at 1.0 M.



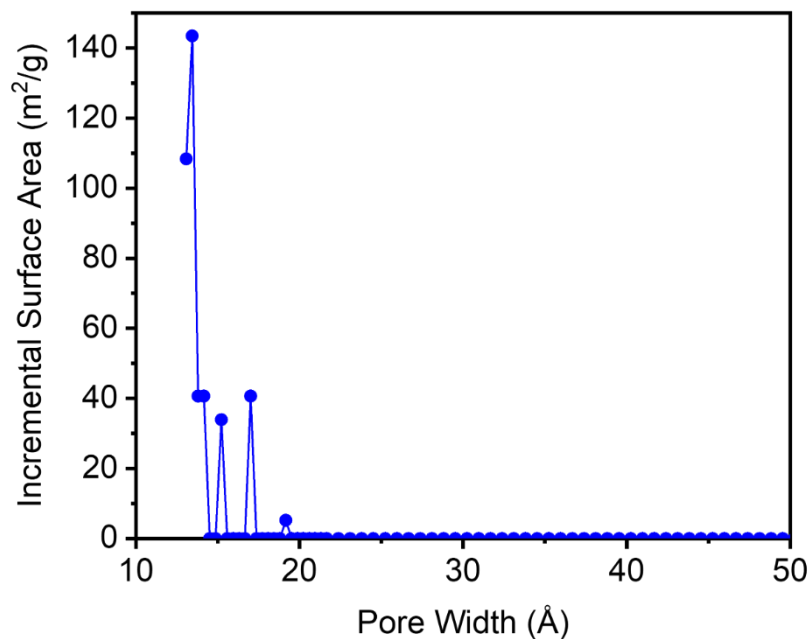

**Figure S11.** DFT-calculated pore size distribution for  $\text{Mg}_2(\text{dobdc})$  synthesized at 1.0 M, assuming a cylindrical pore geometry. The primary pore size is below the lower limit of the measurement.

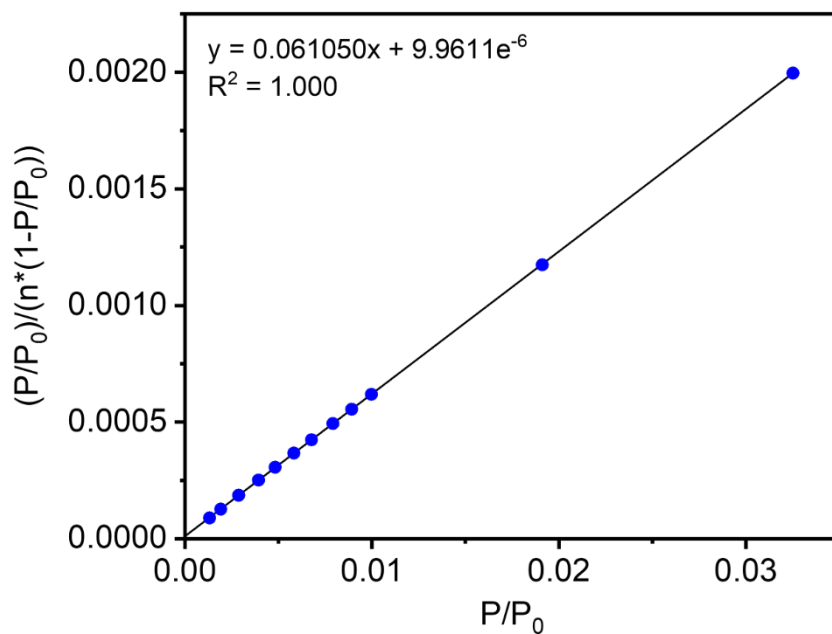

**Figure S12.** Linearized BET plot for the  $\text{N}_2$  adsorption data of  $\text{Mg}_2(\text{dobdc})$  synthesized at 0.5 M.

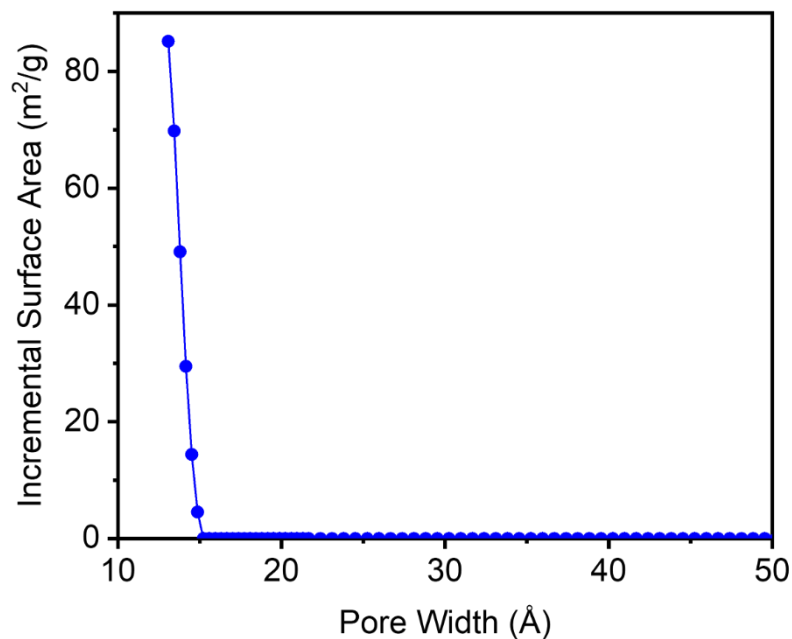

**Figure S13.** DFT-calculated pore size distribution for  $\text{Mg}_2(\text{dobdc})$  synthesized at 0.5 M, assuming a cylindrical pore geometry. The primary pore size is below the lower limit of the measurement.

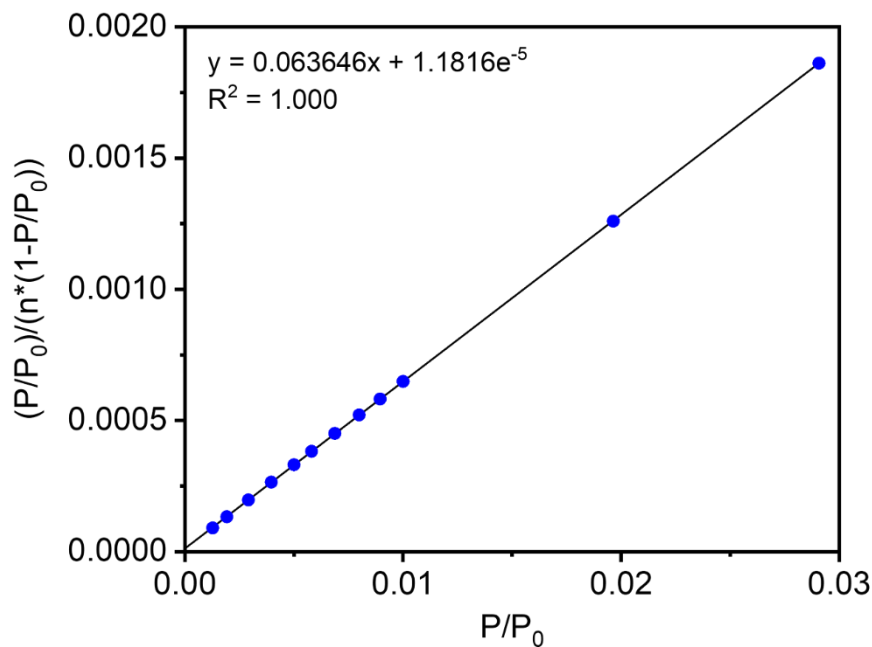

**Figure S14.** Linearized BET plot for the  $\text{N}_2$  adsorption data of  $\text{Mg}_2(\text{dobdc})$  synthesized at 0.1 M.

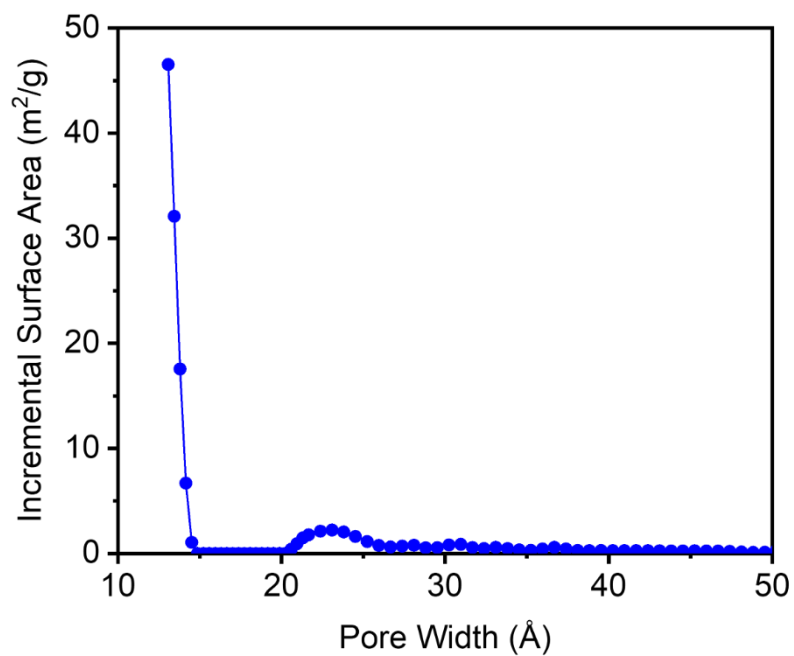

**Figure S15.** DFT-calculated pore size distribution for  $\text{Mg}_2(\text{dobdc})$  synthesized at 0.1 M, assuming a cylindrical pore geometry. The primary pore size is below the lower limit of the measurement.

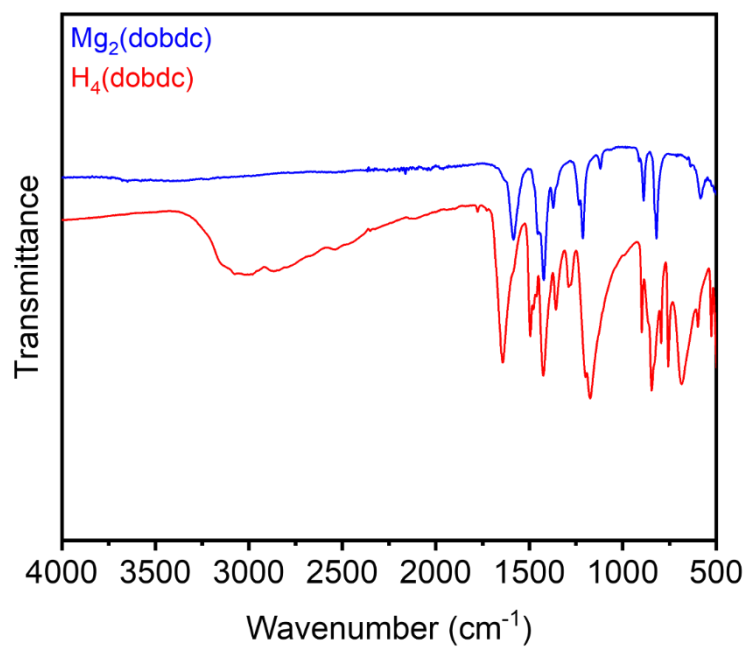

**Figure S16.** ATR-IR spectra of  $\text{Mg}_2(\text{dobdc})$  synthesized at 0.5 M and the  $\text{H}_4\text{dobdc}$  linker.

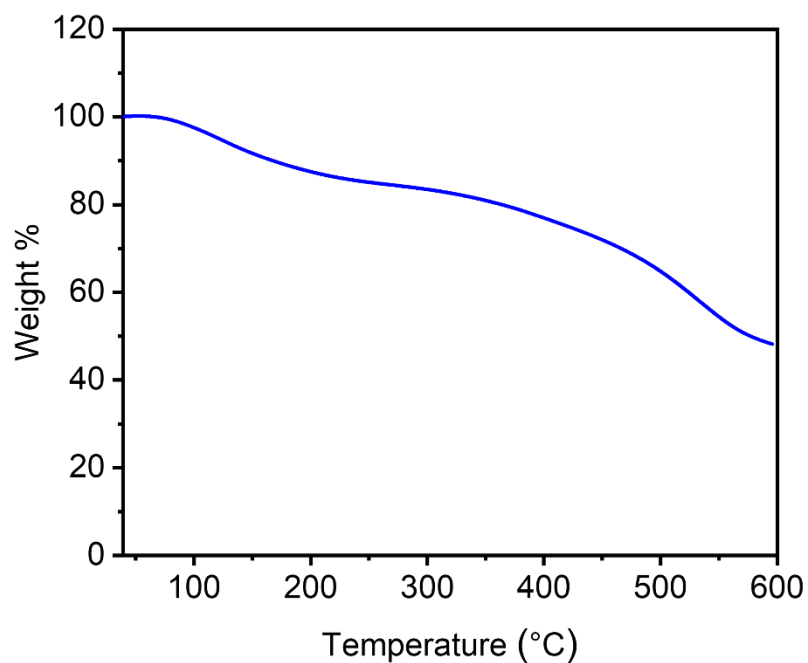

**Figure S17.** Thermogravimetric decomposition profile under N<sub>2</sub> of Mg<sub>2</sub>(dobdc) synthesized at 0.5 M.

**Table S2.** Surface area data and yields for Mg<sub>2</sub>(dobdc) at each synthesized concentration. Literature values for surface areas are included.

| Concentration (M) | BET Surface Area<br>(m <sup>2</sup> /g) | Langmuir Surface Area<br>(m <sup>2</sup> /g) | Yield (%) |
|-------------------|-----------------------------------------|----------------------------------------------|-----------|
| 0.1               | 1532 ± 1                                | 1792                                         | 42.7      |
| 0.5               | 1597 ± 1                                | 1974                                         | 74.6      |
| 1.0               | 1569 ± 1                                | 2092                                         | 71.5      |
| Literature        | 1510 <sup>10</sup>                      | 2060 <sup>7</sup>                            | -         |

### 3.2. Co<sub>2</sub>(dobdc).

Prepared according to a modified literature procedure.<sup>8</sup> In a 20 mL scintillation vial, Co(NO<sub>3</sub>)<sub>2</sub>•6H<sub>2</sub>O (728 mg, 2.50 mmol, 2.50 equiv.) was dissolved in H<sub>2</sub>O (5 mL, 1.0 mL, or 0.5 mL for 0.1 M, 0.5 M, and 1.0 M, respectively). In a separate 20 mL scintillation vial equipped with a stir bar, NaOH (160 mg, 4.00 mmol, 4.00 equiv.), H<sub>4</sub>dobdc (198 mg, 1.00 mmol, 1.00 equiv.), and H<sub>2</sub>O (5 mL, 1.0 mL, or 0.5 mL for 0.1 M, 0.5 M, and 1.0 M, respectively) were combined. The Co(NO<sub>3</sub>)<sub>2</sub>•H<sub>2</sub>O solution was added all at once to the H<sub>4</sub>dobdc solution via a plastic pipette. The mixture was stirred at room temperature for 1 h. The reaction mixture was vacuum-filtered, and the resulting solid was rinsed with MeOH (10–15 mL). The resulting dark red-orange solid was transferred to a new scintillation vial filled with MeOH (10–15 mL). The vial was transferred to an aluminum block on a hot plate that had been pre-heated to 60 °C and was allowed to stand at this temperature for at least 12 h. At this time, the heterogenous mixture was allowed to cool to room temperature, the solvent was decanted, and fresh MeOH (10–15 mL) was added. This process was repeated for a total of six MeOH soaks. After the final soak, the solvent was decanted, and the remaining solid was allowed to dry in air. The sample was then activated using supercritical CO<sub>2</sub> (See Section 1), yielding activated Co<sub>2</sub>(dobdc) (28.4%, 51.6%, 52.4% yield for 0.1 M, 0.5 M, and 1.0 M, respectively) that was immediately transferred to a glass adsorption tube equipped with a Micromeritics *CheckSeal*. The sample was activated on the SmartVac under high vacuum (<10 μbar), ramping the temperature slowly to 180 °C (0.1 °C/min). The sample was allowed to stand at 180 °C under high vacuum (<10 μbar) for 12 h prior to gas adsorption analysis.

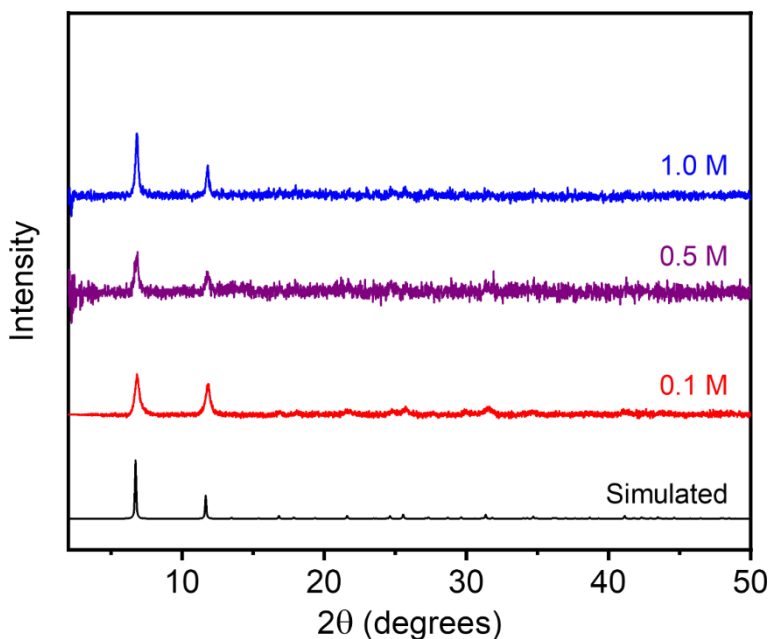

**Figure S18.** Baseline-corrected PXRD patterns ( $\lambda = 1.5406 \text{ \AA}$ ) of MeOH-solvated Co<sub>2</sub>(dobdc) at different concentrations after aqueous synthesis. The simulated pattern based on the previously reported SCXRD structure of the isostructural framework Zn<sub>2</sub>(dobdc) is included for reference.<sup>9</sup>

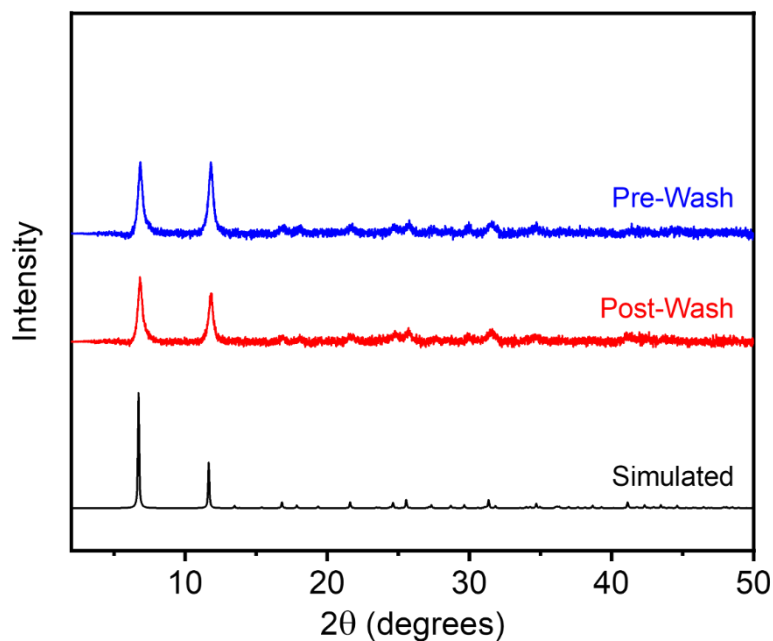

**Figure S19.** Baseline-corrected PXRD patterns ( $\lambda = 1.5406 \text{ \AA}$ ) of  $\text{Co}_2(\text{dobdc})$  synthesized at 0.1 M before (pre-wash) and after (post-wash) soaking in MeOH. The simulated pattern based on the previously reported SCXRD structure of the isostructural framework  $\text{Zn}_2(\text{dobdc})$  is included for reference.<sup>9</sup> No significant change in the pattern was observed upon soaking the MOF in MeOH.

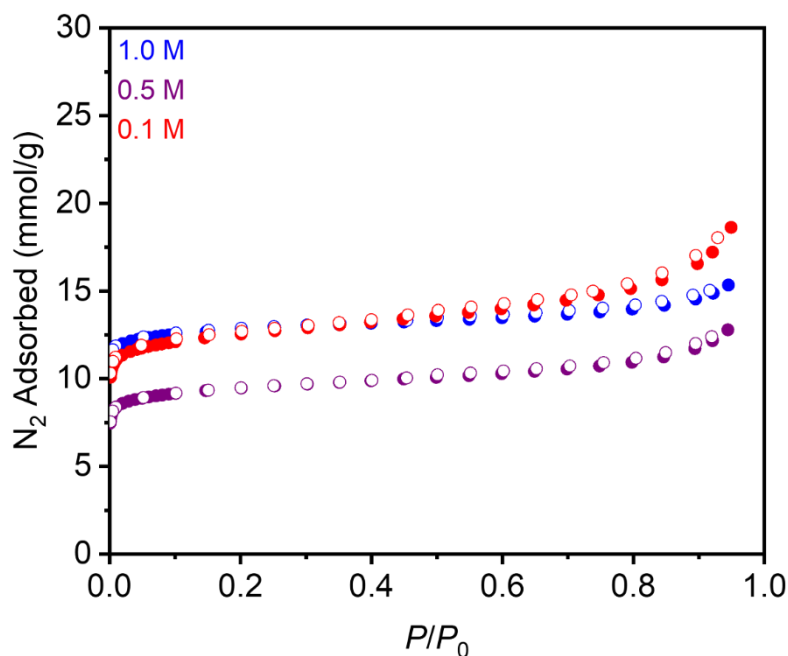

**Figure S20.** 77 K N<sub>2</sub> adsorption (filled circles) and desorption (open circles) isotherms of activated Co<sub>2</sub>(dobdc) at different concentrations after aqueous synthesis. BET surface areas determined from these data are  $1097 \pm 1 \text{ m}^2/\text{g}$  (0.1 M),  $831 \pm 1 \text{ m}^2/\text{g}$  (0.5 M), and  $1155 \pm 1 \text{ m}^2/\text{g}$  (1.0 M). The Langmuir surface areas determined from these data are  $1559 \text{ m}^2/\text{g}$  (0.1 M),  $1115 \text{ m}^2/\text{g}$  (0.5 M), and  $1399 \text{ m}^2/\text{g}$  (1.0 M).

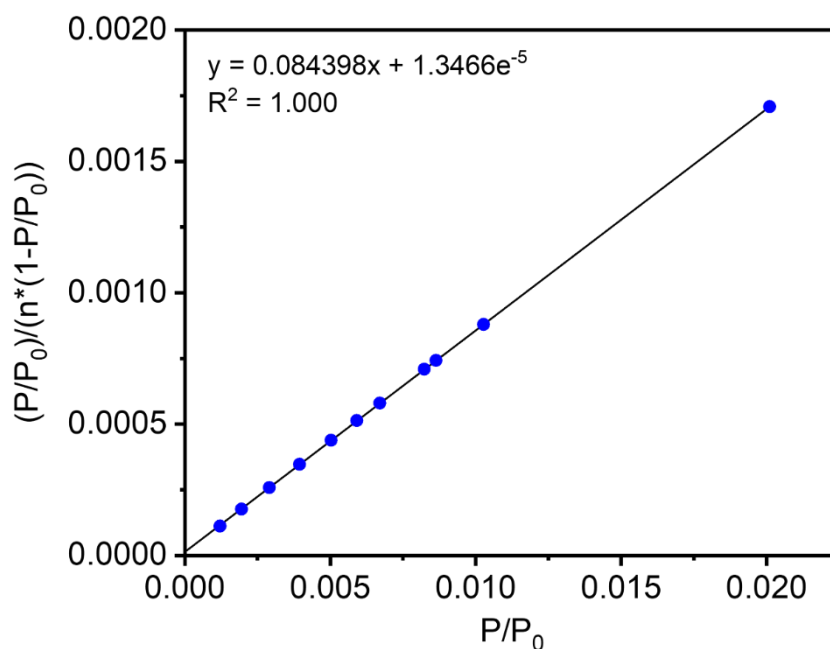

**Figure S21.** Linearized BET plot for the N<sub>2</sub> adsorption data of Co<sub>2</sub>(dobdc) synthesized at 1.0 M.

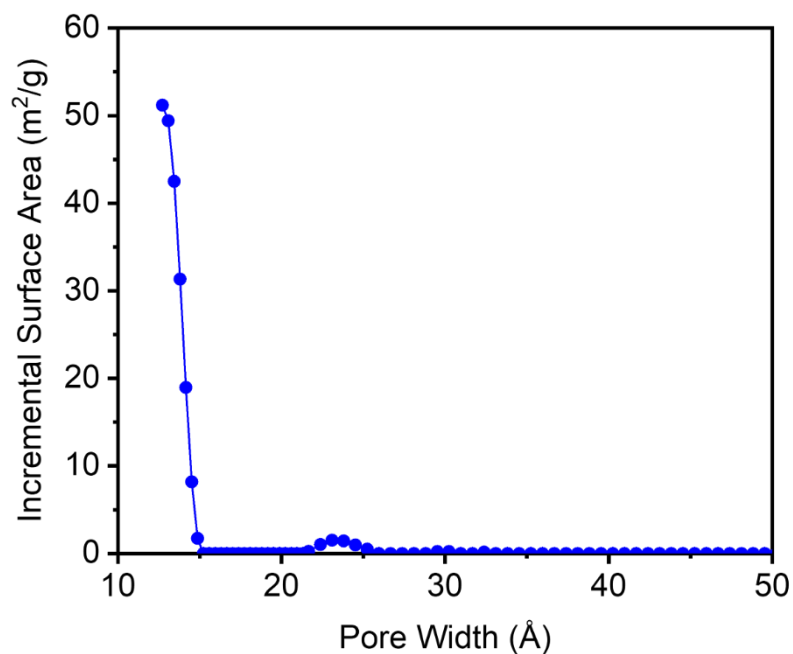

**Figure S22.** DFT-calculated pore size distribution for Co<sub>2</sub>(dobdc) synthesized at 1.0 M, assuming a cylindrical pore geometry. The primary pore size is below the lower limit of the measurement.

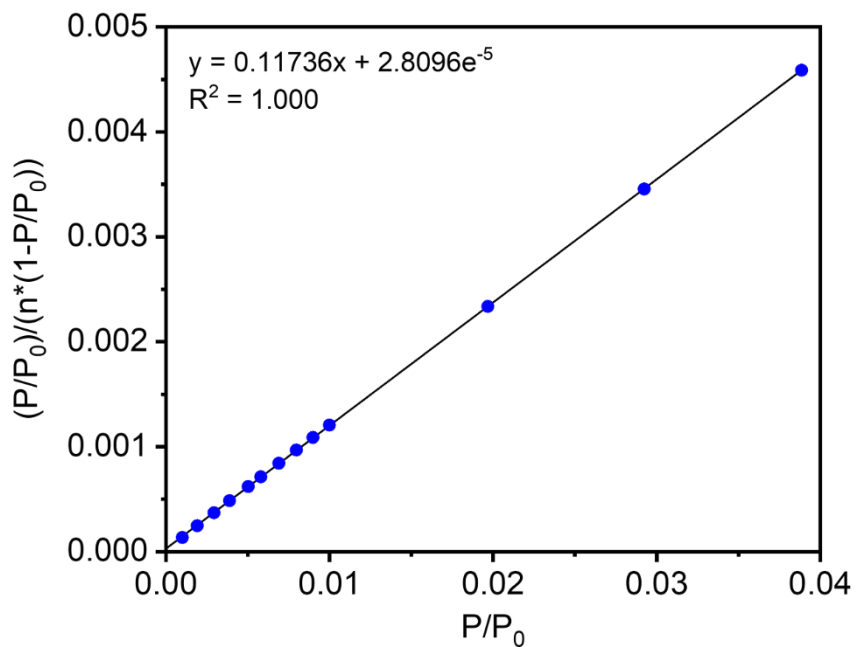

**Figure S23.** Linearized BET plot for the N<sub>2</sub> adsorption data of Co<sub>2</sub>(dobdc) synthesized at 0.5 M.



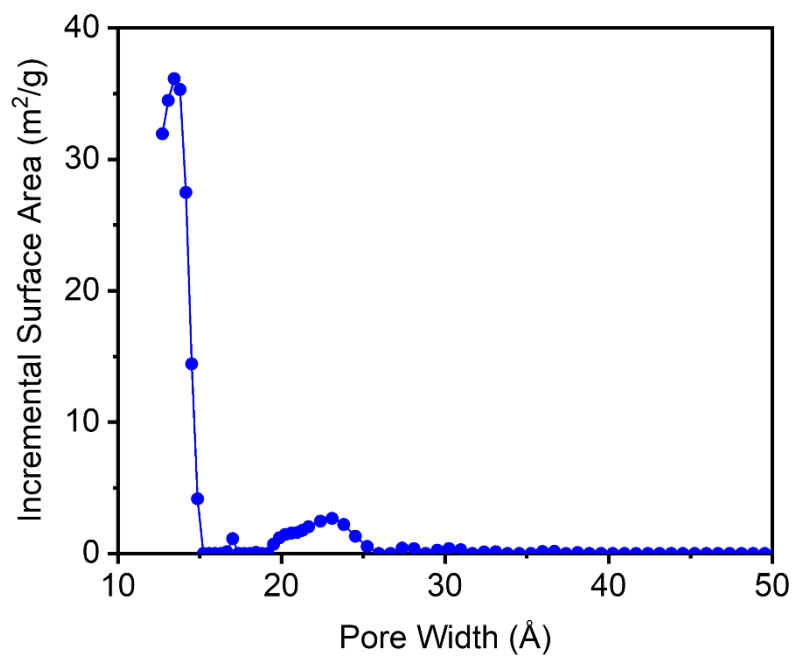

**Figure S24.** DFT-calculated pore size distribution for Co<sub>2</sub>(dobdc) synthesized at 0.5 M, assuming a cylindrical pore geometry.

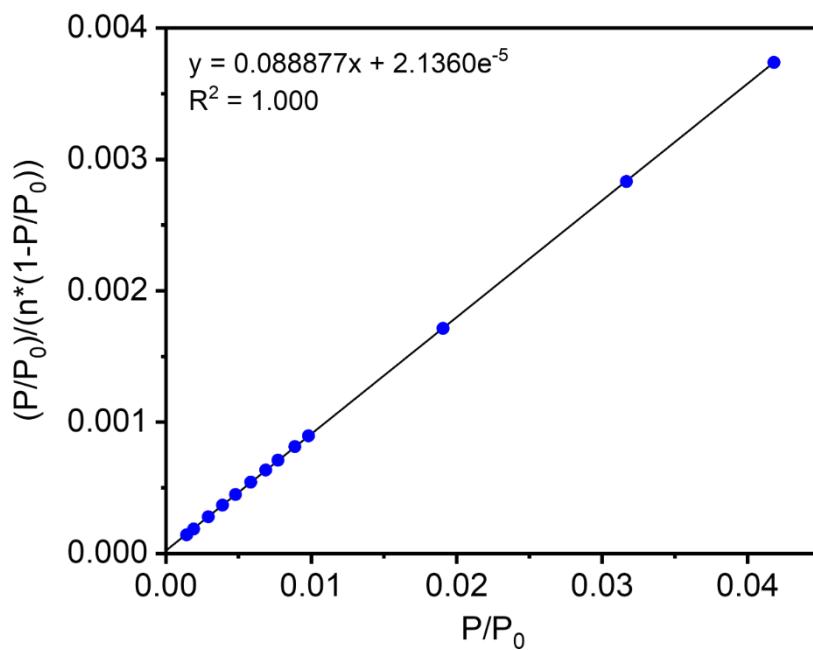

**Figure S25.** Linearized BET plot for the N<sub>2</sub> adsorption data of Co<sub>2</sub>(dobdc) synthesized at 0.1 M.

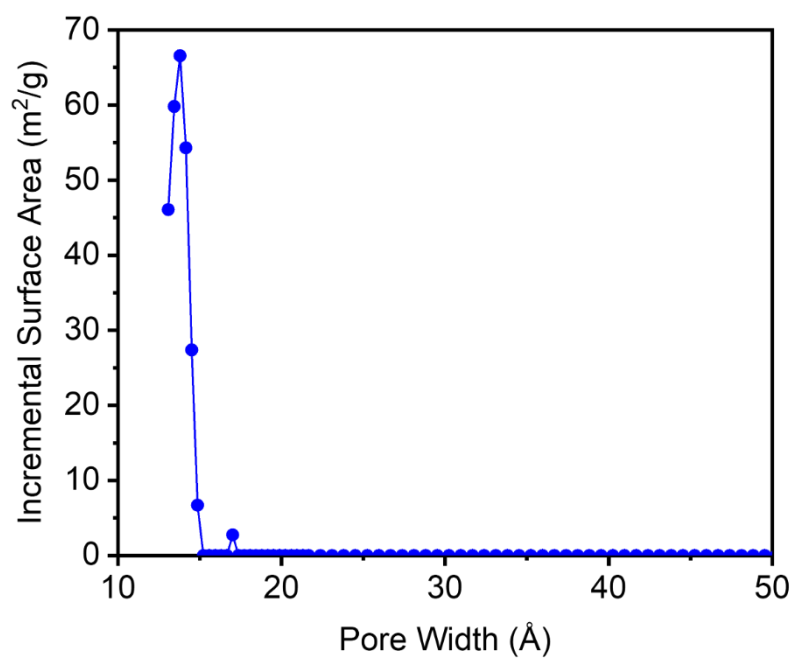

**Figure S26.** DFT-calculated pore size distribution for  $\text{Co}_2(\text{dobdc})$  synthesized at 0.1 M, assuming a cylindrical pore geometry.

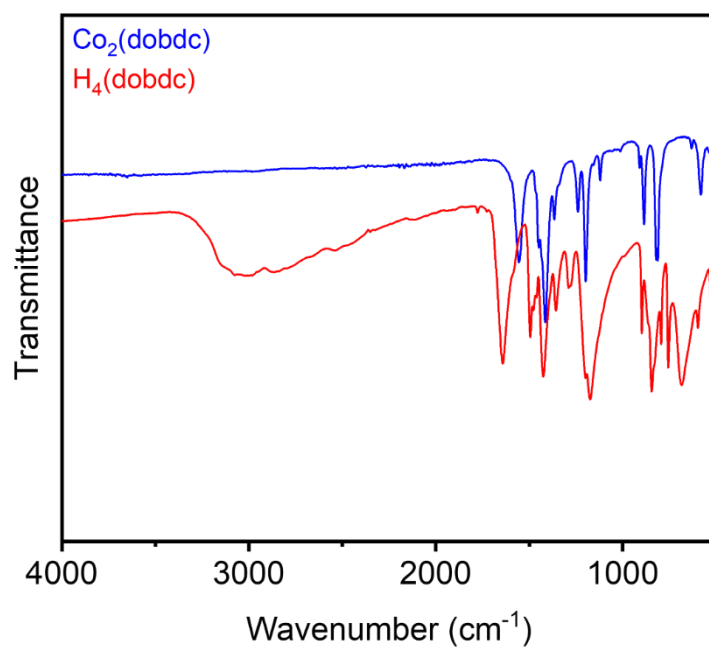

**Figure S27.** ATR-IR spectra of  $\text{Co}_2(\text{dobdc})$  synthesized at 1.0 M and the  $\text{H}_4\text{dobdc}$  linker.

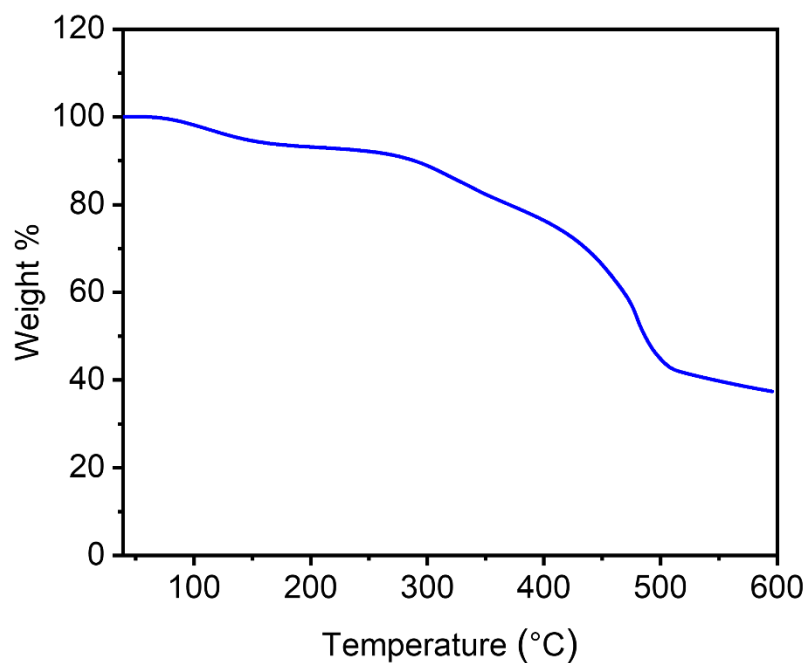

**Figure S28.** Thermogravimetric decomposition profile under N<sub>2</sub> of Co<sub>2</sub>(dobdc) synthesized at 1.0 M.

**Table S3.** Surface area data and yields for Co<sub>2</sub>(dobdc) at each synthesized concentration. Literature values for surface areas are included.

| Concentration (M) | BET Surface Area (m <sup>2</sup> /g) | Langmuir Surface Area (m <sup>2</sup> /g) | Yield (%) |
|-------------------|--------------------------------------|-------------------------------------------|-----------|
| 0.1               | 1097 ± 1                             | 1559                                      | 28.4      |
| 0.5               | 831 ± 1                              | 1115                                      | 51.6      |
| 1.0               | 1155 ± 1                             | 1399                                      | 52.4      |
| Literature        | 1341 <sup>7</sup>                    | 1432 <sup>7</sup>                         | -         |

### 3.3. Ni<sub>2</sub>(dobdc).

Prepared according to a modified literature procedure.<sup>8</sup> In a 20 mL scintillation vial, Ni(NO<sub>3</sub>)<sub>2</sub>•6H<sub>2</sub>O (727 mg, 2.50 mmol, 2.50 equiv.) was dissolved in H<sub>2</sub>O (5 mL, 1.0 mL, or 0.5 mL for 0.1 M, 0.5 M, and 1.0 M, respectively). In a separate 20 mL scintillation vial equipped with a stir bar, NaOH (160 mg, 4.00 mmol, 4.00 equiv.), H<sub>4</sub>dobdc (198 mg, 1.00 mmol, 1.00 equiv.), and H<sub>2</sub>O (5 mL, 1.0 mL, or 0.5 mL for 0.1 M, 0.5 M, and 1.0 M, respectively) were combined. The Ni(NO<sub>3</sub>)<sub>2</sub>•H<sub>2</sub>O solution was added all at once to the H<sub>4</sub>dobdc solution via a plastic pipette. The mixture was stirred at room temperature for 1 h. The reaction mixture was vacuum-filtered, and the resulting solid was rinsed with MeOH (10–15 mL). The resulting dark brown solid was transferred to a new scintillation vial filled with MeOH (10–15 mL). The vial was transferred to an aluminum block on a hot plate that had been pre-heated to 60 °C and was allowed to stand at this temperature for at least 12 h. At this time, the heterogenous mixture was allowed to cool to room temperature, the solvent was decanted, and fresh MeOH (10–15 mL) was added. This process was repeated for a total of six MeOH soaks. After the final soak, the solvent was decanted, and the remaining solid was allowed to dry in air. The sample was then activated using supercritical CO<sub>2</sub> (See Section 1), yielding activated Ni<sub>2</sub>(dobdc) (85.7%, 78.5%, and 57.1% yield for 0.1 M, 0.5 M, and 1.0 M, respectively) that was immediately transferred to a glass adsorption tube equipped with a Micromeritics *CheckSeal*. The sample was activated on the SmartVac under high vacuum (<10 μbar), ramping the temperature slowly to 180 °C (0.1 °C/min). The sample was allowed to stand at 180 °C under high vacuum (<10 μbar) for 12 h prior to gas adsorption analysis.

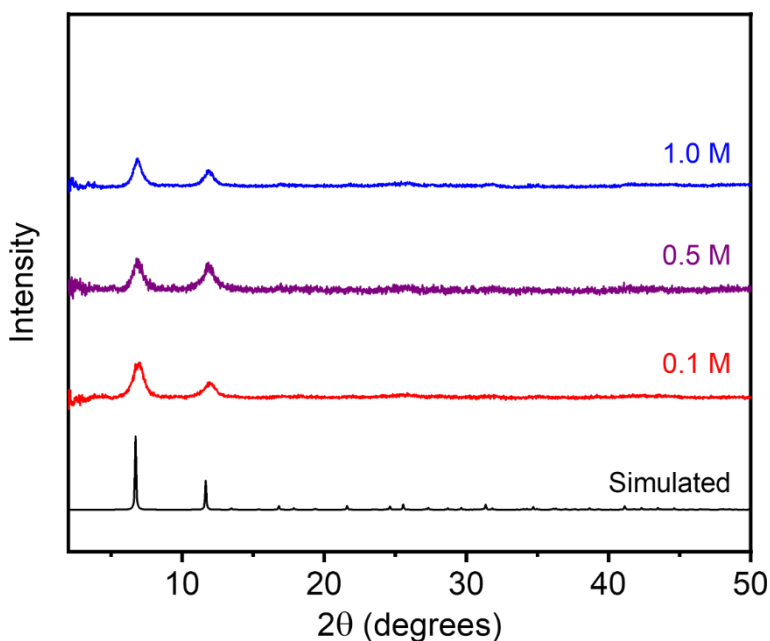

**Figure S29.** Baseline-corrected PXRD patterns ( $\lambda = 1.5406 \text{ \AA}$ ) of MeOH-solvated Ni<sub>2</sub>(dobdc) at different concentrations after aqueous synthesis. The simulated pattern based on the previously reported SCXRD structure of the isostructural framework Zn<sub>2</sub>(dobdc) is included for reference.<sup>9</sup>

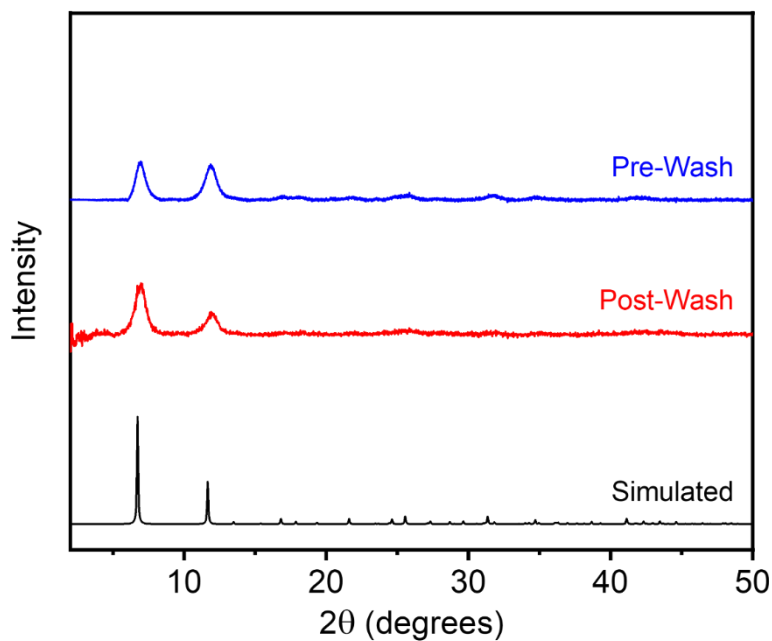

**Figure S30.** Baseline-corrected PXRD patterns ( $\lambda = 1.5406 \text{ \AA}$ ) of  $\text{Ni}_2(\text{dobdc})$  synthesized at 0.1 M before (pre-wash) and after (post-wash) soaking in MeOH. The simulated pattern based on the previously reported SCXRD structure of the isostructural framework  $\text{Zn}_2(\text{dobdc})$  is included for reference.<sup>9</sup> No significant change in the pattern was observed upon soaking the MOF in MeOH.

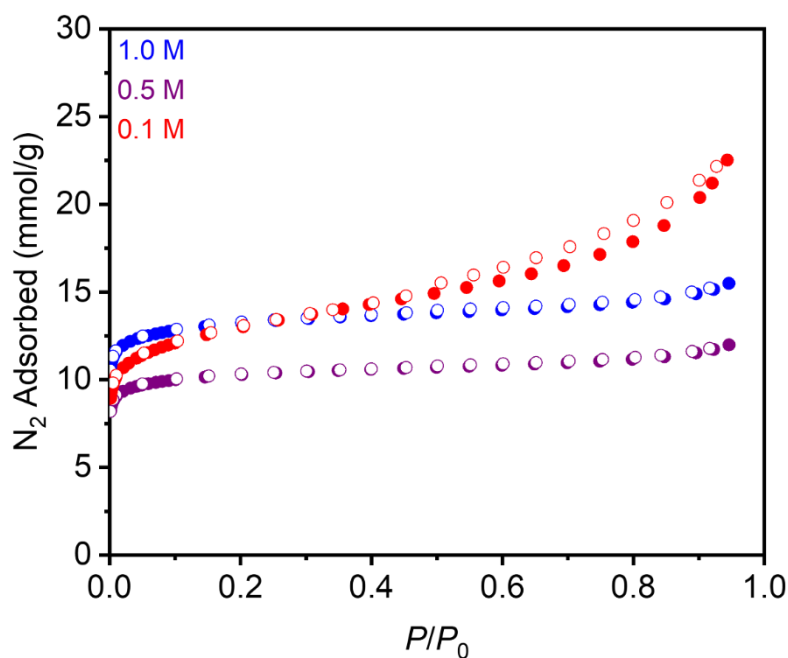

**Figure S31.** 77 K N<sub>2</sub> adsorption (filled circles) and desorption (open circles) isotherms of activated Ni<sub>2</sub>(dobdc) at different concentrations after aqueous synthesis. BET surface areas determined from these data are  $1071 \pm 2 \text{ m}^2/\text{g}$  (0.1 M),  $906 \pm 1 \text{ m}^2/\text{g}$  (0.5 M), and  $1160 \pm 1 \text{ m}^2/\text{g}$  (1.0 M). The Langmuir surface areas determined from these data are  $1859 \text{ m}^2/\text{g}$  (0.1 M),  $1113 \text{ m}^2/\text{g}$  (0.5 M), and  $1438 \text{ m}^2/\text{g}$  (1.0 M).

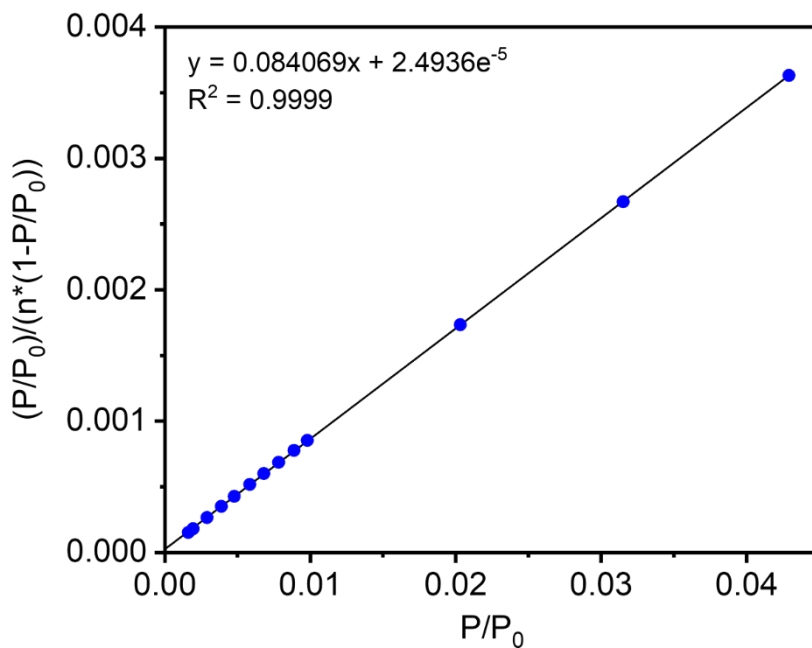

**Figure S32.** Linearized BET plot for the N<sub>2</sub> adsorption data of Ni<sub>2</sub>(dobdc) synthesized at 1.0 M.

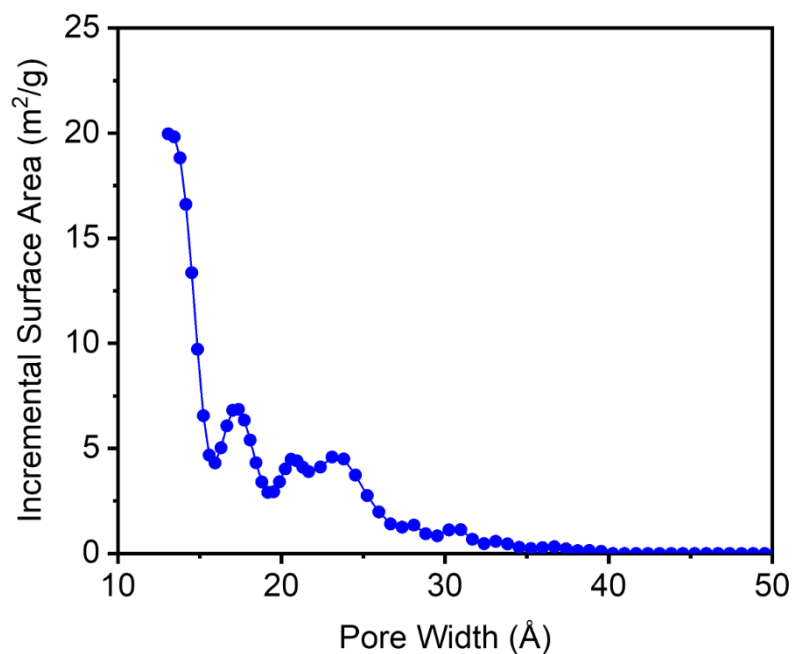

**Figure S33.** DFT-calculated pore size distribution for  $\text{Ni}_2(\text{dobdc})$  synthesized at 1.0 M, assuming a cylindrical pore geometry. The primary pore size is below the lower limit of the measurement.

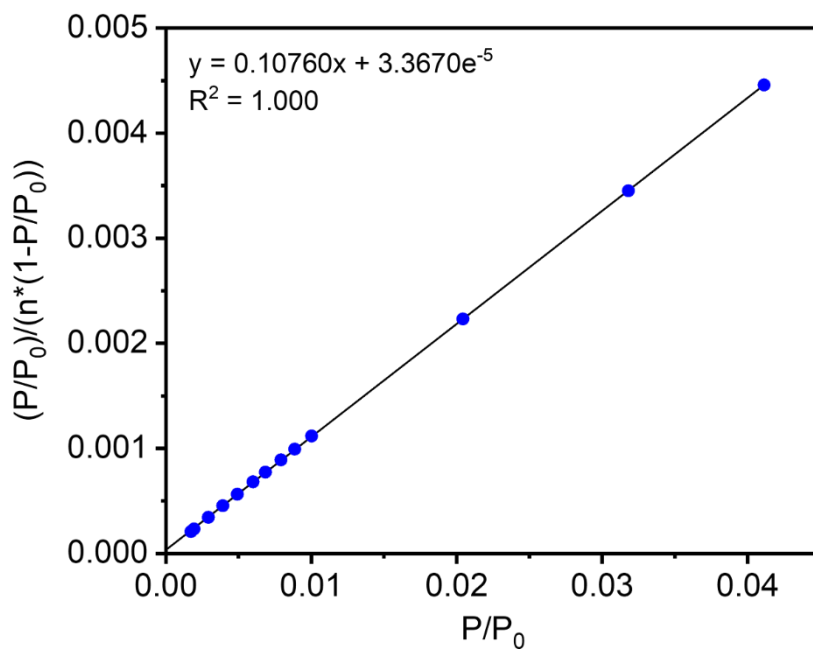

**Figure S34.** Linearized BET plot for the  $\text{N}_2$  adsorption data of  $\text{Ni}_2(\text{dobdc})$  synthesized at 0.5 M.

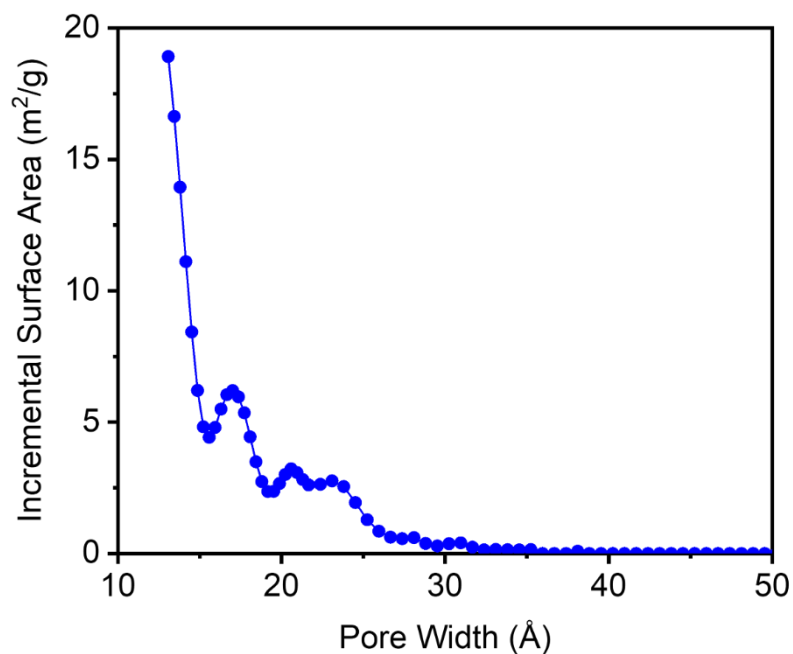

**Figure S35.** DFT-calculated pore size distribution for  $\text{Ni}_2(\text{dobdc})$  synthesized at 0.5 M, assuming a cylindrical pore geometry. The primary pore size is below the lower limit of the measurement.

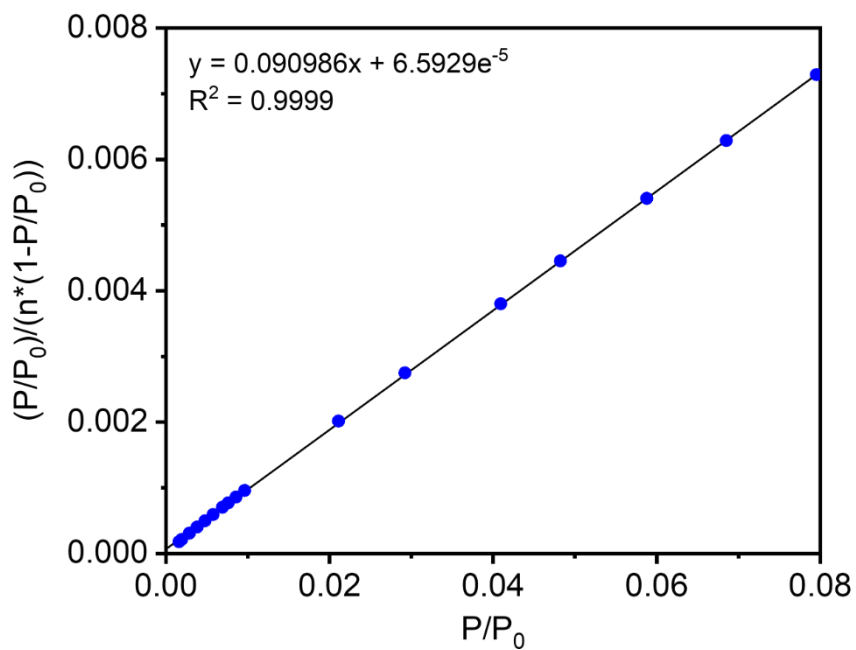

**Figure S36.** Linearized BET plot for the  $\text{N}_2$  adsorption data of  $\text{Ni}_2(\text{dobdc})$  synthesized at 0.1 M.



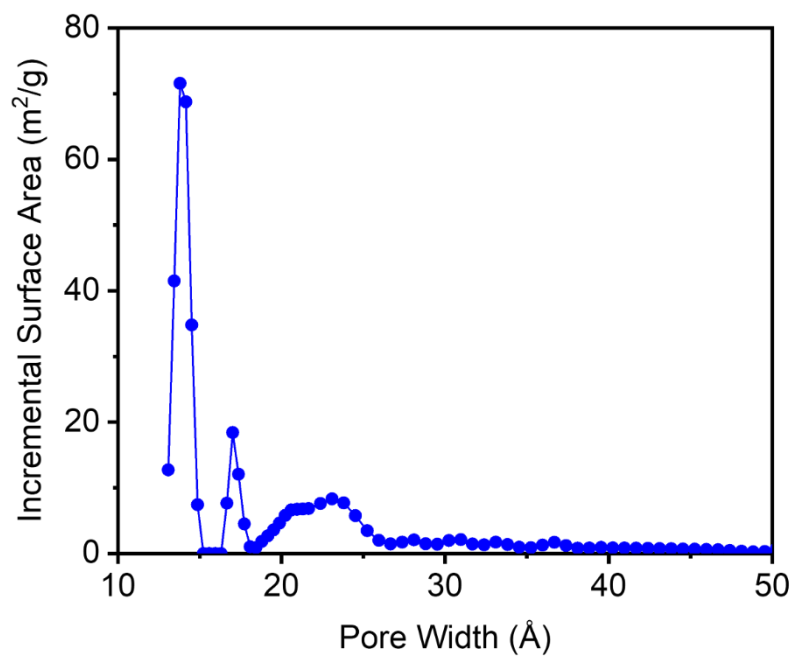

**Figure S37.** DFT-calculated pore size distribution for  $\text{Ni}_2(\text{dobdc})$  synthesized at 0.1 M, assuming a cylindrical pore geometry.

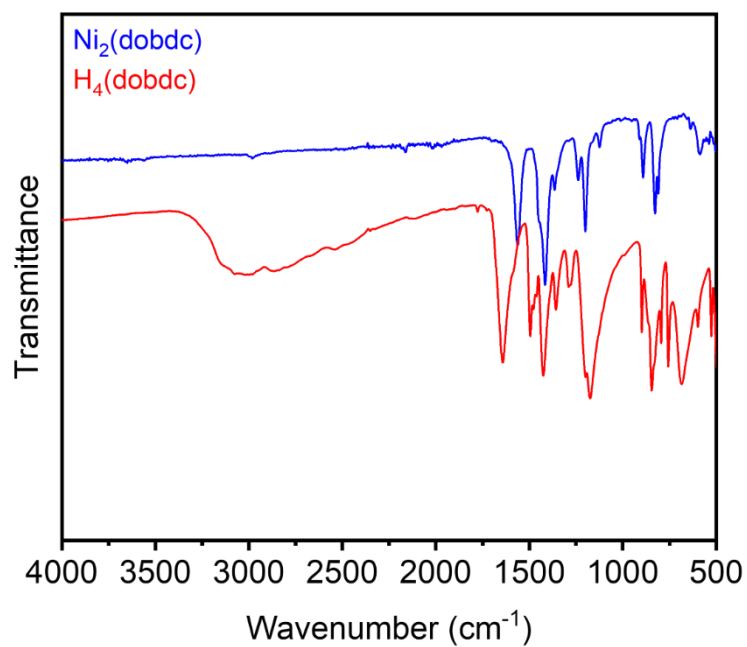

**Figure S38.** ATR-IR spectra of  $\text{Ni}_2(\text{dobdc})$  synthesized at 1.0 M and the  $\text{H}_4\text{dobdc}$  linker.

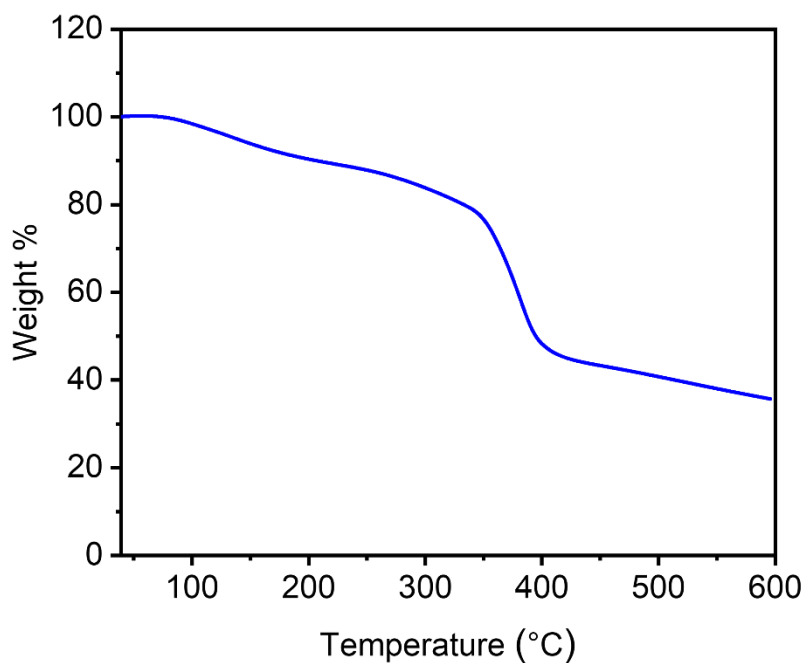

**Figure S39.** Thermogravimetric decomposition profile under N<sub>2</sub> of Ni<sub>2</sub>(dobdc) synthesized at 1.0 M.

**Table S4.** Surface area data and yields for Ni<sub>2</sub>(dobdc) at each synthesized concentration. Literature values for surface areas are included.

| Concentration (M) | BET Surface Area<br>(m <sup>2</sup> /g) | Langmuir Surface Area<br>(m <sup>2</sup> /g) | Yield (%) |
|-------------------|-----------------------------------------|----------------------------------------------|-----------|
| 0.1               | 1071 ± 2                                | 1859                                         | 85.7      |
| 0.5               | 906 ± 1                                 | 1113                                         | 78.5      |
| 1.0               | 1160 ± 1                                | 1438                                         | 57.1      |
| Literature        | 1218 <sup>7</sup>                       | 1312 <sup>7</sup>                            | -         |

### 3.4. Zn<sub>2</sub>(dobdc).

Prepared according to a modified literature procedure.<sup>8</sup> In a 20 mL scintillation vial, Zn(NO<sub>3</sub>)<sub>2</sub>•6H<sub>2</sub>O (744 mg, 2.50 mmol, 2.50 equiv.) was dissolved in H<sub>2</sub>O (5 mL, 1.0 mL, or 0.5 mL for 0.1 M, 0.5 M, and 1.0 M, respectively). In a separate 20 mL scintillation vial equipped with a stir bar, NaOH (160 mg, 4.00 mmol, 4.00 equiv.), 2,5-dihydroxyterephthalic acid (198 mg, 1.00 mmol, 1.00 equiv.), and H<sub>2</sub>O (5 mL, 1.0 mL, or 0.5 mL for 0.1 M, 0.5 M, and 1.0 M, respectively) were combined. The Zn(NO<sub>3</sub>)<sub>2</sub>•H<sub>2</sub>O solution was added all at once to the H<sub>4</sub>dobdc solution via a plastic pipette. The mixture was stirred at room temperature for 1 h. The reaction mixture was vacuum-filtered, and the resulting solid was rinsed with MeOH (10–15 mL). The resulting yellowish-brown solid was transferred to a new scintillation vial filled with MeOH (10–15 mL). The vial was transferred to an aluminum block on a hot plate that had been pre-heated to 60 °C and was allowed to stand at this temperature for at least 12 h. At this time, the heterogenous mixture was allowed to cool to room temperature, the solvent was decanted, and fresh MeOH (10–15 mL) was added. This process was repeated for a total of six MeOH soaks. After the final soak, the solvent was decanted, and the remaining solid was allowed to dry in air. The sample was then activated using supercritical CO<sub>2</sub> (See Section 1), yielding activated Zn<sub>2</sub>(dobdc) (70.5%, 74.2%, 67.3% yield for 0.1 M, 0.5 M, and 1.0 M, respectively) that was immediately transferred to a glass adsorption tube equipped with a Micromeritics *CheckSeal*. The sample was activated on the SmartVac under high vacuum (<10 μbar), ramping the temperature slowly to 180 °C (0.1 °C/min). The sample was allowed to stand at 180 °C under high vacuum (<10 μbar) for 12 h prior to gas adsorption analysis.

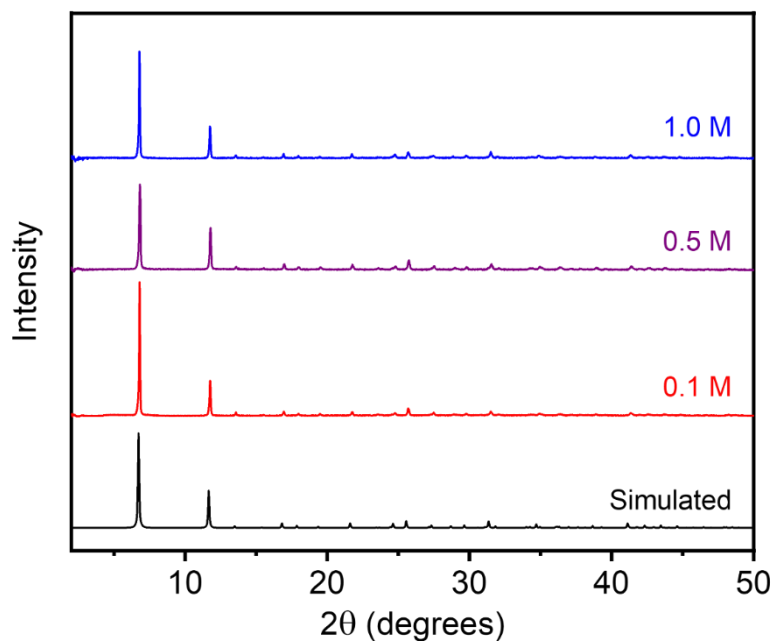

**Figure S40.** Baseline-corrected PXRD patterns ( $\lambda = 1.5406 \text{ \AA}$ ) of MeOH-solvated  $\text{Zn}_2(\text{dobdc})$  at different concentrations after aqueous synthesis. The simulated pattern based on the previously reported SCXRD structure of  $\text{Zn}_2(\text{dobdc})$  is included for reference.<sup>9</sup>

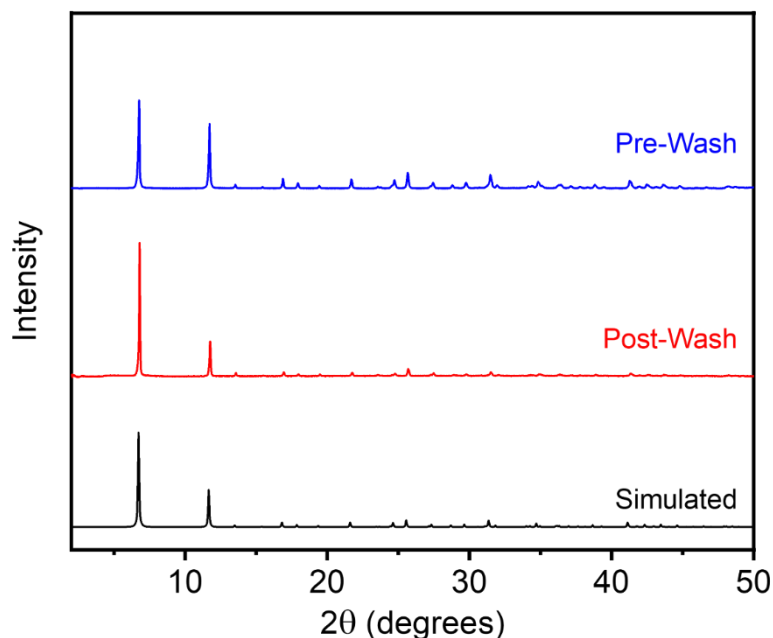

**Figure S41.** Baseline-corrected PXRD patterns ( $\lambda = 1.5406 \text{ \AA}$ ) of  $\text{Zn}_2(\text{dobdc})$  synthesized at 0.1 M before (pre-wash) and after (post-wash) soaking in MeOH. The simulated pattern based on the previously reported SCXRD structure of the isostructural framework  $\text{Zn}_2(\text{dobdc})$  is included for reference.<sup>9</sup> Minimal changes in the PXRD pattern were observed upon soaking in MeOH.

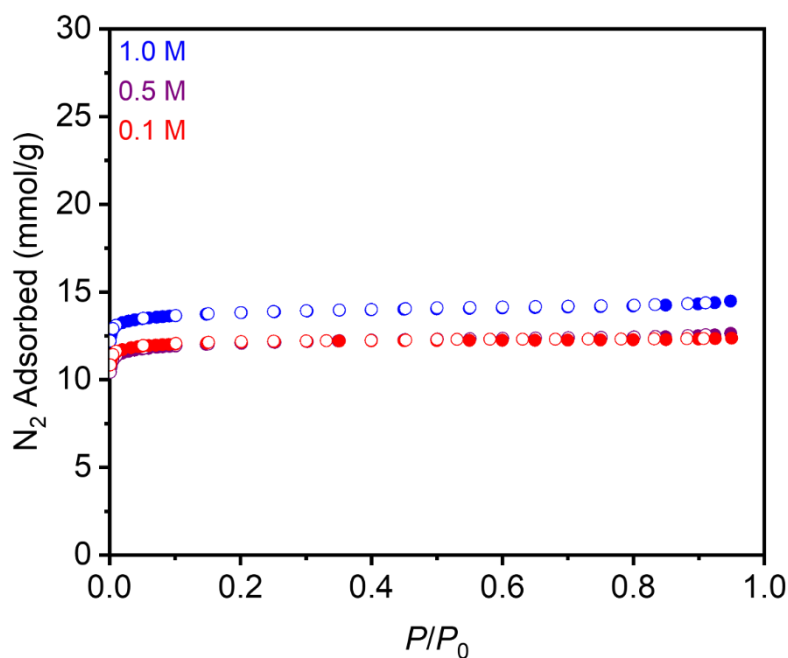

**Figure S42.** 77 K N<sub>2</sub> adsorption (filled circles) and desorption (open circles) isotherms of activated Zn<sub>2</sub>(dobdc) at different concentrations after aqueous synthesis. BET surface areas determined from these data are  $1127 \pm 1 \text{ m}^2/\text{g}$  (0.1 M),  $1108 \pm 1 \text{ m}^2/\text{g}$  (0.5 M), and  $1274 \pm 1 \text{ m}^2/\text{g}$  (1.0 M). The Langmuir surface areas determined from these data are  $1202 \text{ m}^2/\text{g}$  (0.1 M),  $1219 \text{ m}^2/\text{g}$  (0.5 M), and  $1395 \text{ m}^2/\text{g}$  (1.0 M).

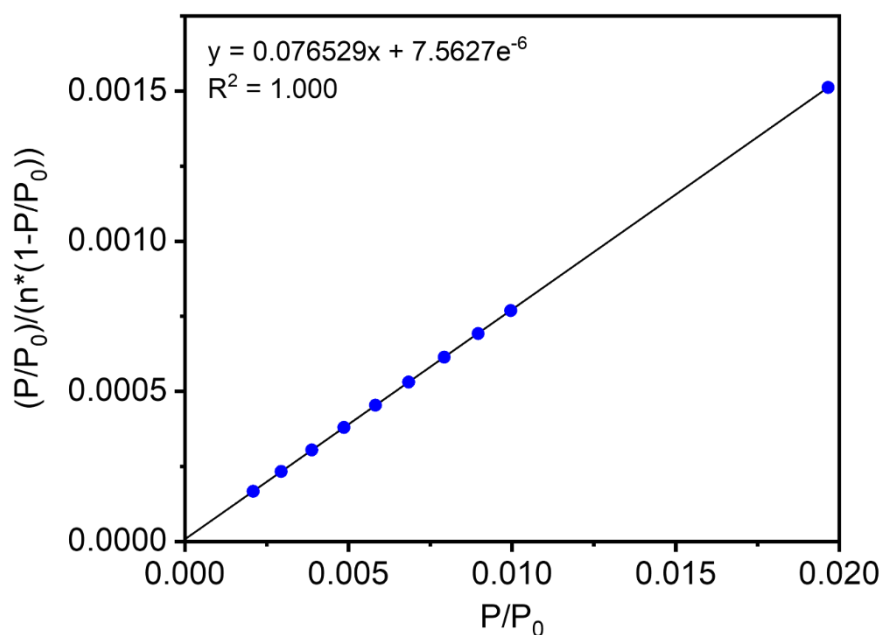

**Figure S43.** Linearized BET plot for the N<sub>2</sub> adsorption data of Zn<sub>2</sub>(dobdc) synthesized at 1.0 M.

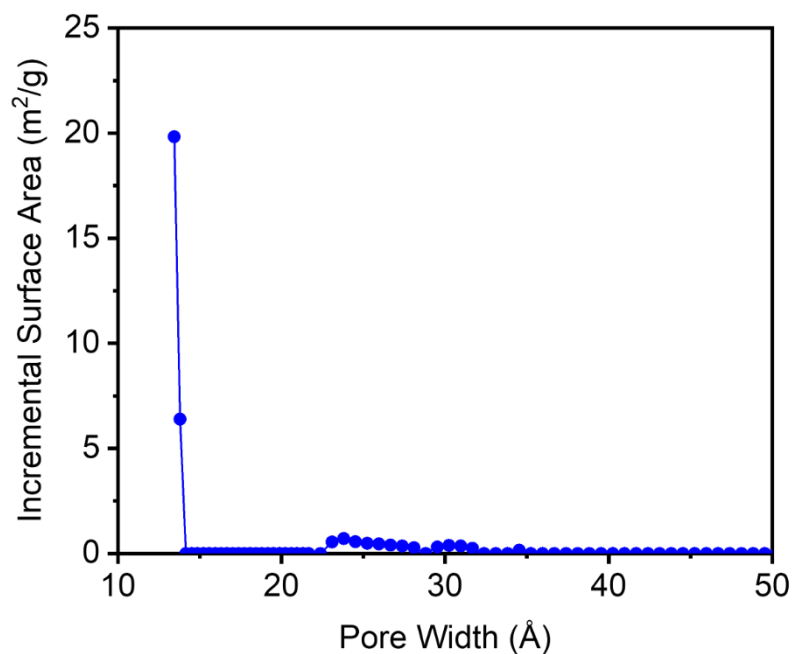

**Figure S44.** DFT-calculated pore size distribution for  $\text{Zn}_2(\text{dobdc})$  synthesized at 1.0 M, assuming a cylindrical pore geometry. The primary pore size is below the lower limit of the measurement.

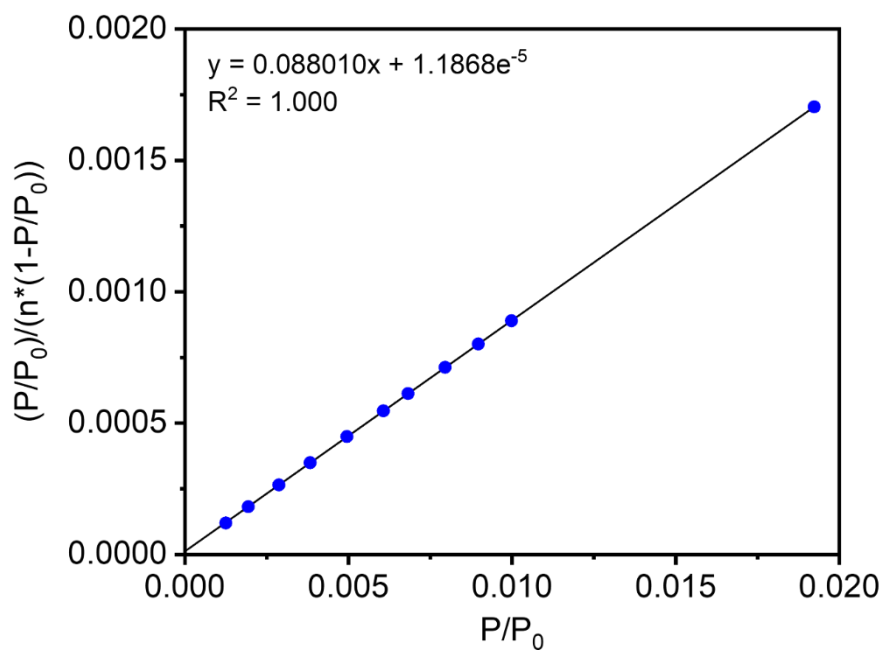

**Figure S45.** Linearized BET plot for the  $\text{N}_2$  adsorption data of  $\text{Zn}_2(\text{dobdc})$  synthesized at 0.5 M.

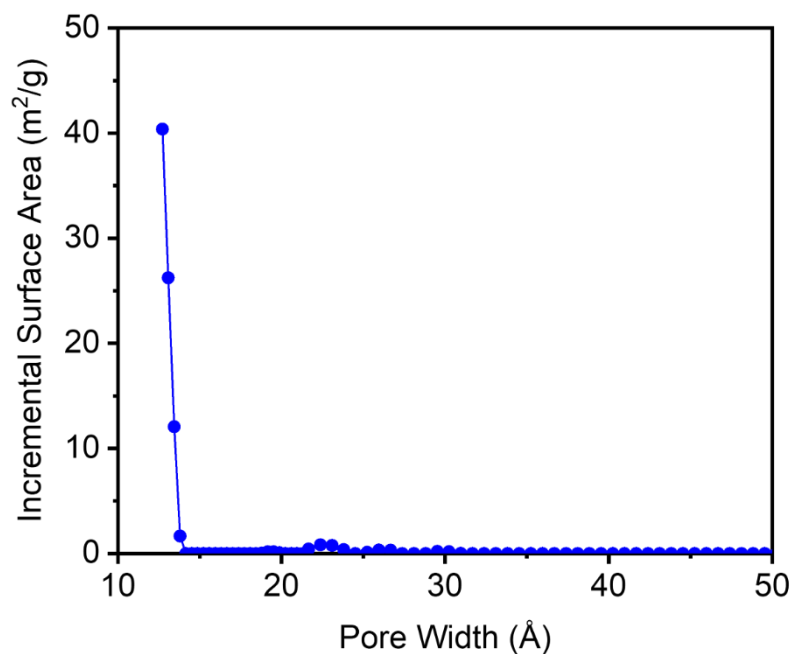

**Figure S46.** DFT-calculated pore size distribution for  $\text{Zn}_2(\text{dobdc})$  synthesized at 0.5 M, assuming a cylindrical pore geometry. The primary pore size is below the lower limit of the measurement.

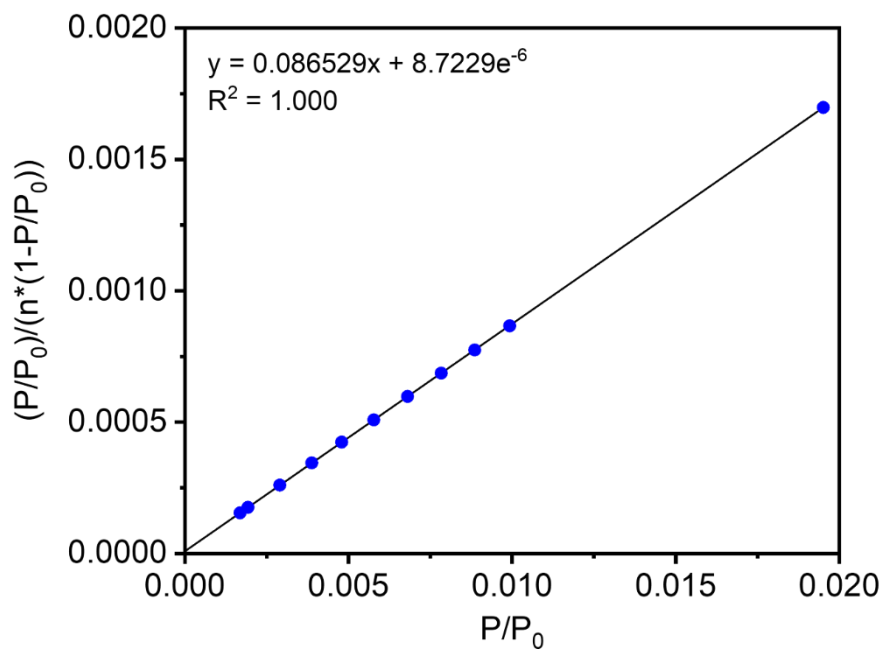

**Figure S47.** Linearized BET plot for the  $\text{N}_2$  adsorption data of  $\text{Zn}_2(\text{dobdc})$  synthesized at 0.1 M.

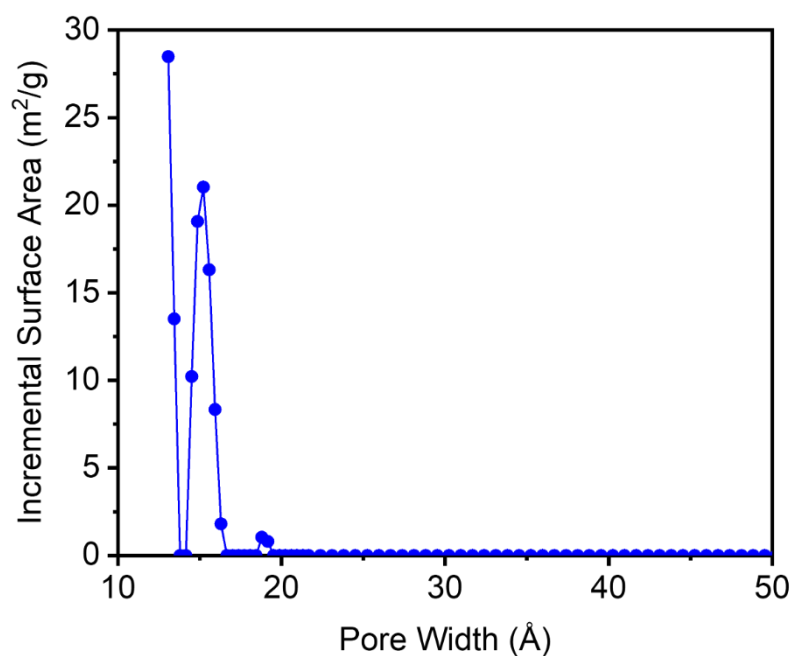

**Figure S48.** DFT-calculated pore size distribution for  $\text{Zn}_2(\text{dobdc})$  synthesized at 0.1 M, assuming a cylindrical pore geometry. The primary pore size is below the lower limit of the measurement.

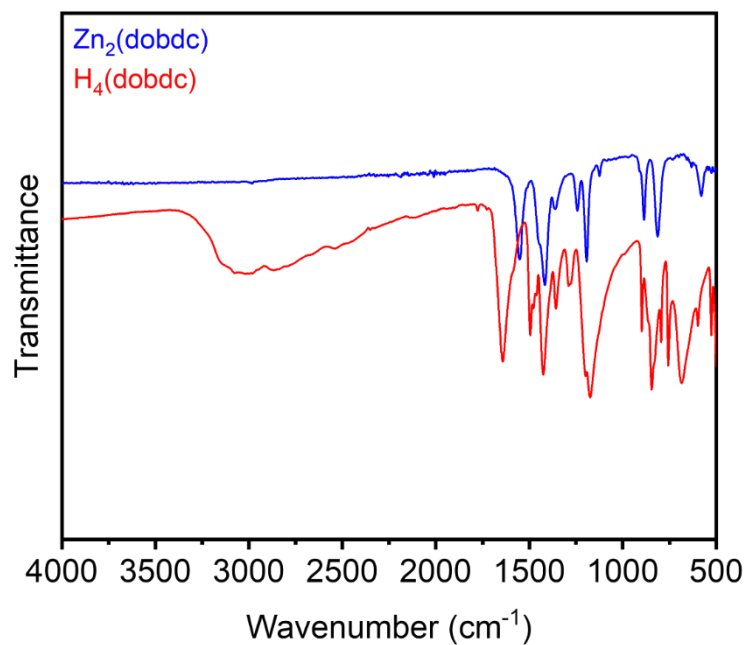

**Figure S49.** ATR-IR spectra of  $\text{Zn}_2(\text{dobdc})$  synthesized at 1.0 M and the  $\text{H}_4\text{dobdc}$  linker.



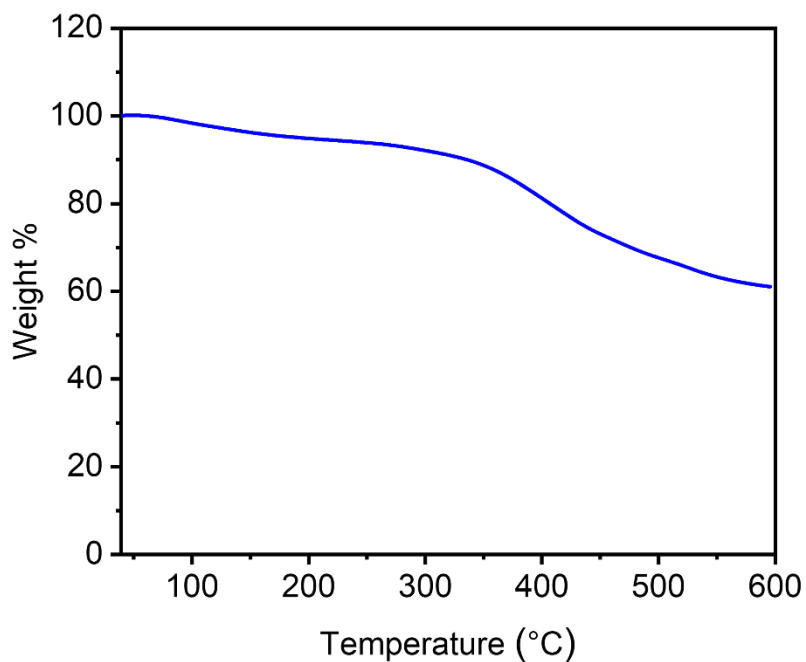

**Figure S50.** Thermogravimetric decomposition profile under N<sub>2</sub> of Zn<sub>2</sub>(dobdc) synthesized at 1.0 M.

**Table S5.** Surface area data and yields for Zn<sub>2</sub>(dobdc) at each synthesized concentration. Literature values for surface areas are included.

| Concentration (M) | BET Surface Area (m <sup>2</sup> /g) | Langmuir Surface Area (m <sup>2</sup> /g) | Yield (%) |
|-------------------|--------------------------------------|-------------------------------------------|-----------|
| 0.1               | 1127 ± 1                             | 1202                                      | 70.5      |
| 0.5               | 1108 ± 1                             | 1219                                      | 74.2      |
| 1.0               | 1274 ± 1                             | 1395                                      | 67.3      |
| Literature        | 1039 <sup>11</sup>                   | 1277 <sup>12</sup>                        | -         |

#### 4. High-concentration aqueous syntheses of $M_2(\text{dobpdc})$ MOFs.

##### 4.1. $Mg_2(\text{dobpdc})$ .

Prepared according to a modified literature procedure.<sup>8</sup> In a 20 mL scintillation vial,  $Mg(\text{NO}_3)_2 \cdot 6\text{H}_2\text{O}$  (321 mg, 1.25 mmol, 2.50 equiv.) was dissolved in  $\text{H}_2\text{O}$  (2.5 mL, 0.5 mL, or 0.25 mL for 0.1 M, 0.5 M, and 1.0 M, respectively). In a separate 20 mL scintillation vial equipped with a stir bar, NaOH (80.0 mg, 2.00 mmol, 4.00 equiv.),  $\text{H}_4\text{dobpdc}$  (137 mg, 0.50 mmol, 1.00 equiv.), and  $\text{H}_2\text{O}$  (2.5 mL, 0.5 mL, or 0.25 mL for 0.1 M, 0.5 M, and 1.0 M, respectively) were combined. The  $Mg(\text{NO}_3)_2 \cdot 6\text{H}_2\text{O}$  solution was added all at once to the  $\text{H}_4\text{dobpdc}$  solution via a plastic pipette. The mixture was stirred at room temperature for 1 h. The reaction mixture was vacuum-filtered, and the resulting solid was rinsed with MeOH (10–15 mL). The resulting yellow-white solid was transferred to a new scintillation vial filled with MeOH (10–15 mL). The vial was transferred to an aluminum block on a hot plate that had been pre-heated to 60 °C and was allowed to stand at this temperature for at least 12 h. At this time, the heterogenous mixture was allowed to cool to room temperature, the solvent was decanted, and fresh MeOH (10–15 mL) was added. This process was repeated for a total of six MeOH soaks. After the final soak, the solvent was decanted, and the remaining solid was allowed to dry in air. The sample was then activated using supercritical  $\text{CO}_2$  (See Section 1), yielding activated  $Mg_2(\text{dobpdc})$  (57.9%, 94.4%, and 50.9% yield for 0.1 M, 0.5 M, and 1.0 M, respectively) that was immediately transferred to a glass adsorption tube equipped with a Micromeritics *CheckSeal*. The sample was activated on the SmartVac under high vacuum (<10  $\mu\text{bar}$ ), ramping the temperature slowly to 180 °C (0.1°C/min). The sample was allowed to stand at 180 °C under high vacuum (<10  $\mu\text{bar}$ ) for 12 h prior to gas adsorption analysis.

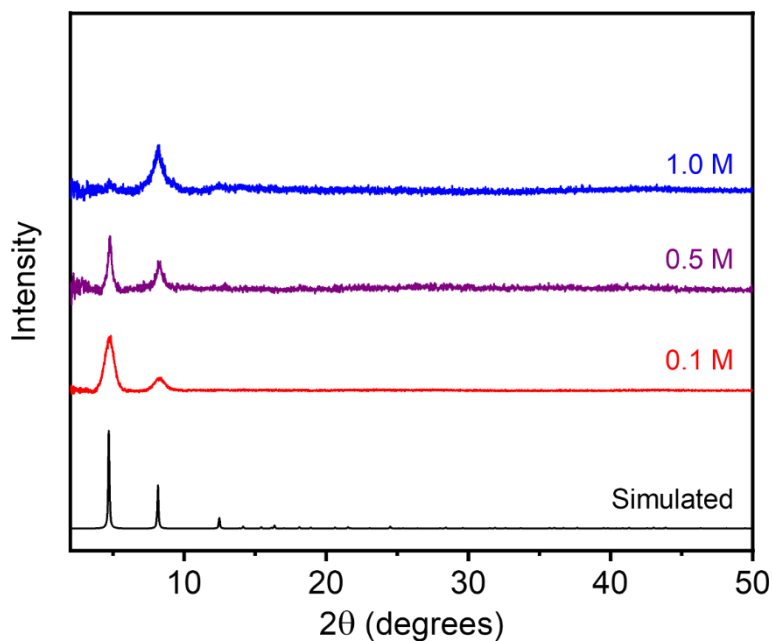

**Figure S51.** Baseline-corrected PXRD patterns ( $\lambda = 1.5406 \text{ \AA}$ ) of MeOH-solvated  $\text{Mg}_2(\text{dobpdc})$  at different concentrations after aqueous synthesis. The simulated pattern based on the previously reported SCXRD structure of the isostructural framework  $\text{Zn}_2(\text{dobpdc})$  is included for reference.<sup>13</sup>

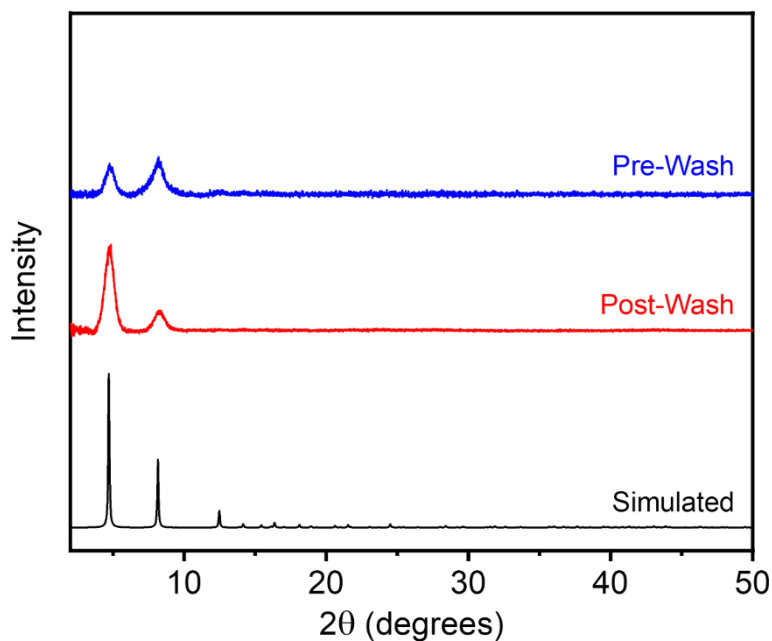

**Figure S52.** Baseline-corrected PXRD patterns ( $\lambda = 1.5406 \text{ \AA}$ ) of MeOH-solvated  $\text{Mg}_2(\text{dobpdc})$  synthesized at 0.1 M before (pre-wash) and after (post-wash) soaking in MeOH. The simulated pattern based on the previously reported SCXRD structure of the isostructural framework  $\text{Zn}_2(\text{dobpdc})$  is included for reference.<sup>13</sup> The MOF shows improved crystallinity after soaking.

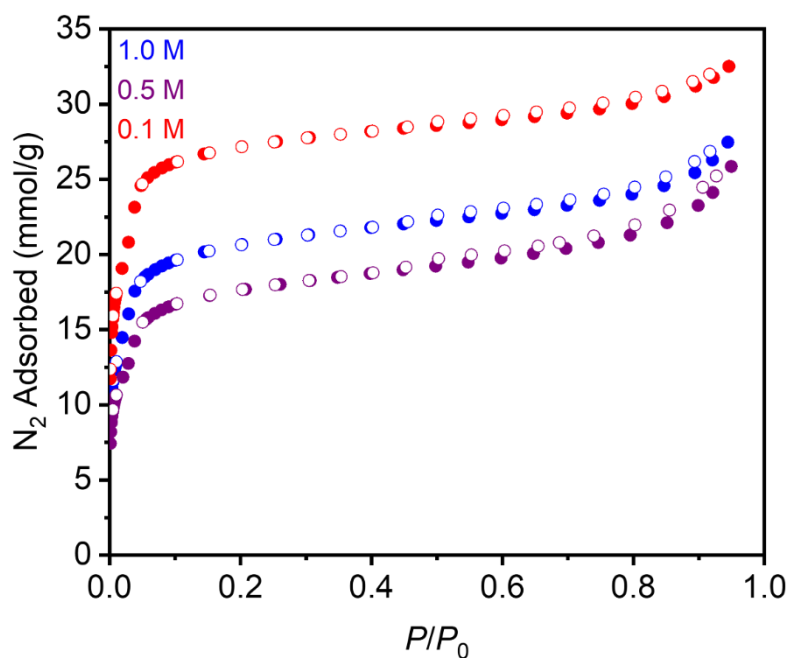

**Figure S53.** 77 K N<sub>2</sub> adsorption (filled circles) and desorption (open circles) isotherms of activated Mg<sub>2</sub>(dobpdc) at different concentrations after aqueous synthesis. BET surface areas determined from these data are  $2369 \pm 40 \text{ m}^2/\text{g}$  (0.1 M),  $1514 \pm 20 \text{ m}^2/\text{g}$  (0.5 M), and  $1785 \pm 21 \text{ m}^2/\text{g}$  (1.0 M). The Langmuir surface areas determined from these data are  $3011 \text{ m}^2/\text{g}$  (0.1 M),  $2206 \text{ m}^2/\text{g}$  (0.5 M), and  $2445 \text{ m}^2/\text{g}$  (1.0 M).

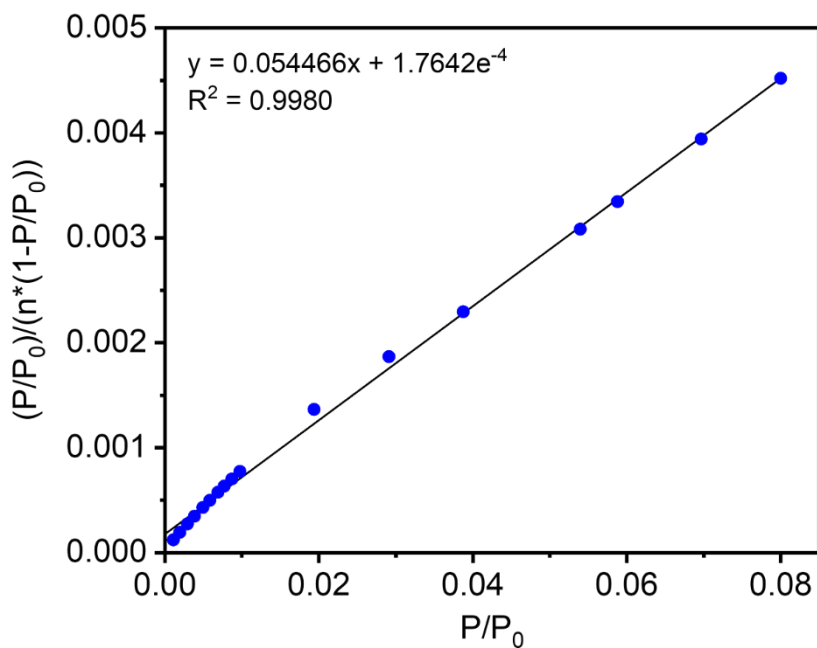

**Figure S54.** Linearized BET plot for the N<sub>2</sub> adsorption data of Mg<sub>2</sub>(dobpdc) synthesized at 1.0 M.

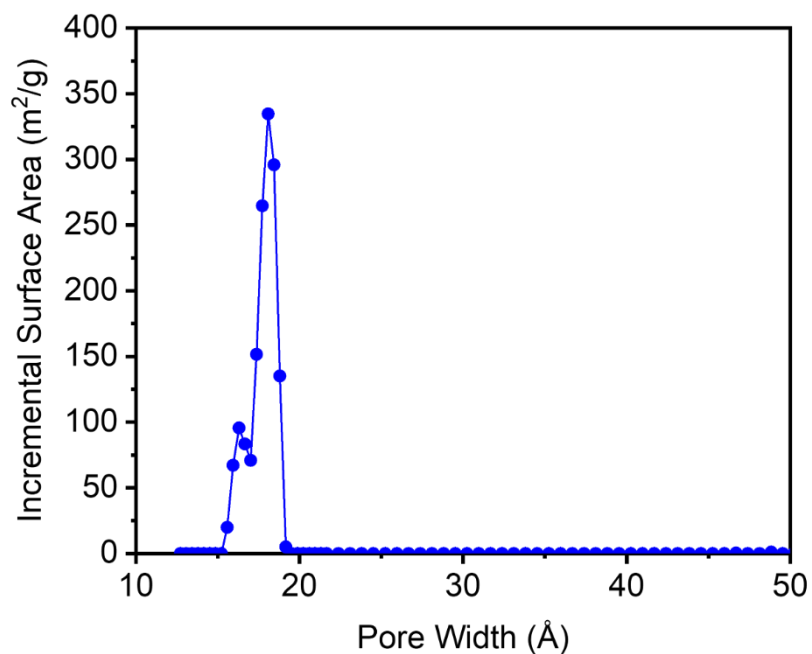

**Figure S55.** DFT-calculated pore size distribution for  $\text{Mg}_2(\text{dobpdc})$  synthesized at 1.0 M, assuming a cylindrical pore geometry.

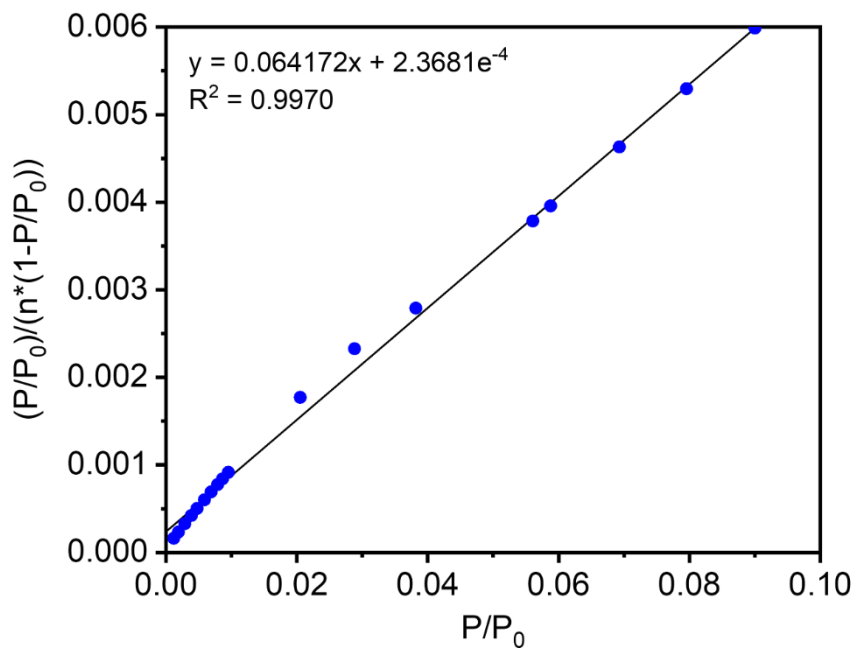

**Figure S56.** Linearized BET plot for the  $\text{N}_2$  adsorption data of  $\text{Mg}_2(\text{dobpdc})$  synthesized at 0.5 M.

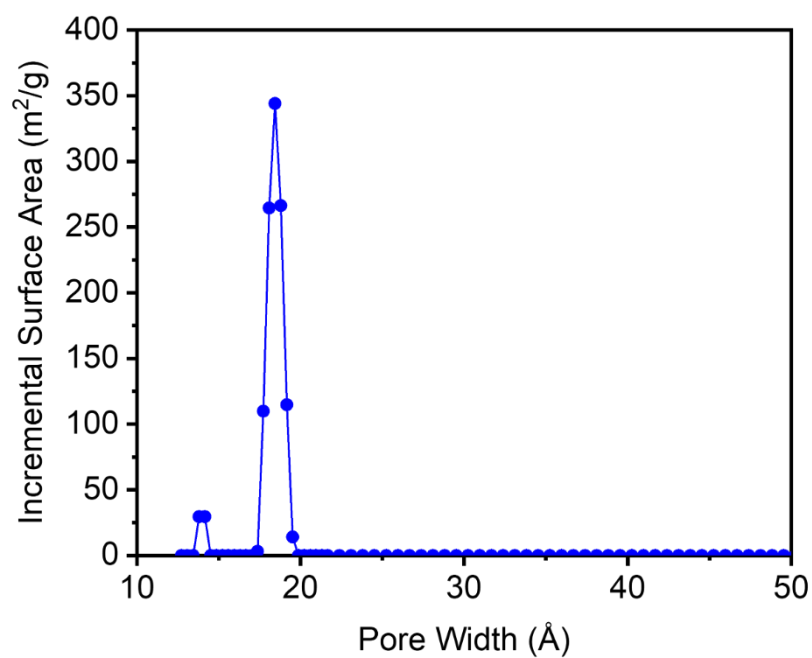

**Figure S57.** DFT-calculated pore size distribution for  $\text{Mg}_2(\text{dobpdc})$  synthesized at 0.5 M, assuming a cylindrical pore geometry.

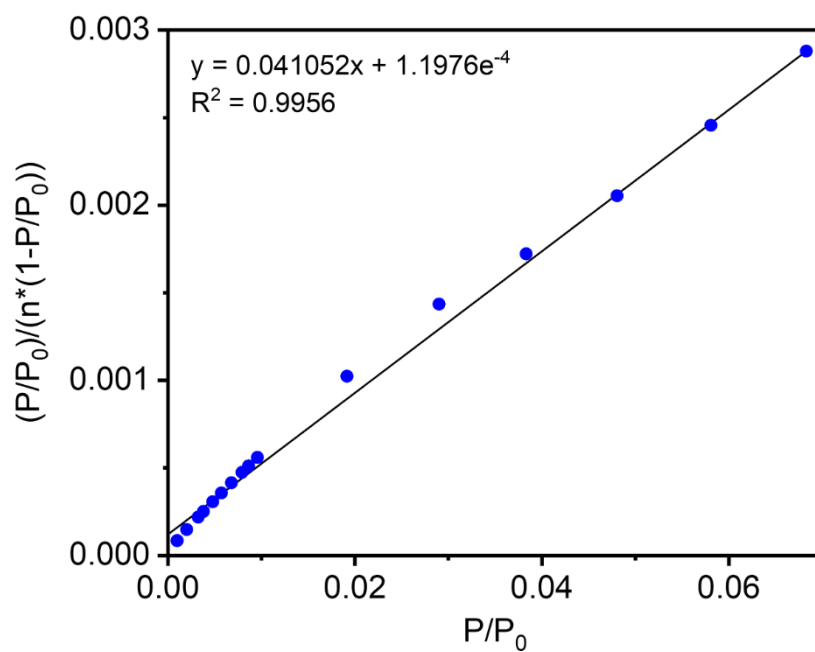

**Figure S58.** Linearized BET plot for the  $\text{N}_2$  adsorption data of  $\text{Mg}_2(\text{dobpdc})$  synthesized at 0.1 M.

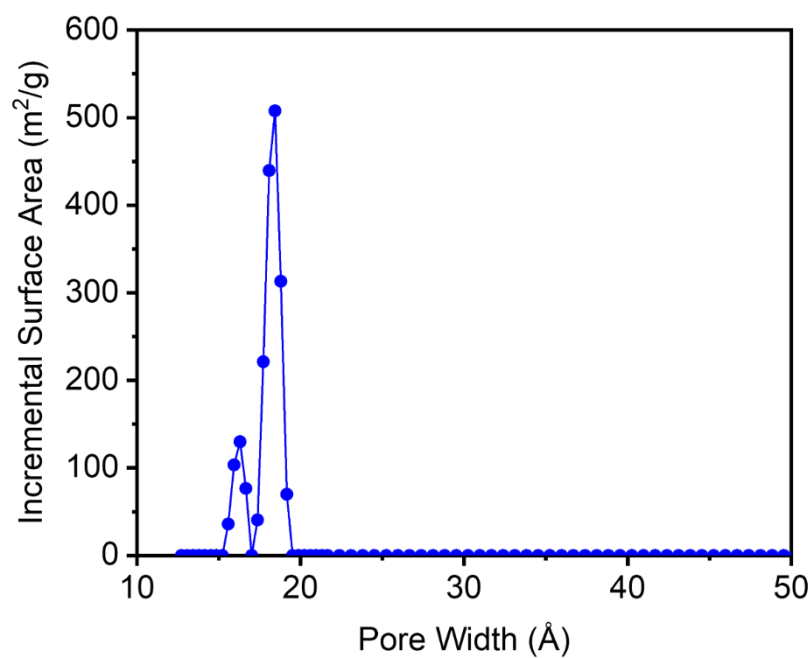

**Figure S59.** DFT-calculated pore size distribution for  $\text{Mg}_2(\text{dobpdc})$  synthesized at 0.1 M, assuming a cylindrical pore geometry.

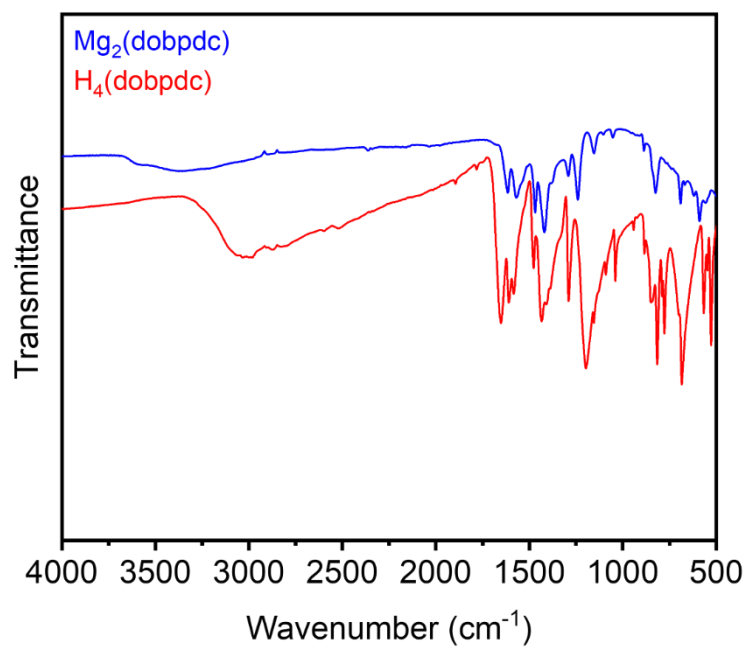

**Figure S60.** ATR-IR spectra of  $\text{Mg}_2(\text{dobpdc})$  synthesized at 0.1 M and the  $\text{H}_4\text{dobpdc}$  linker.

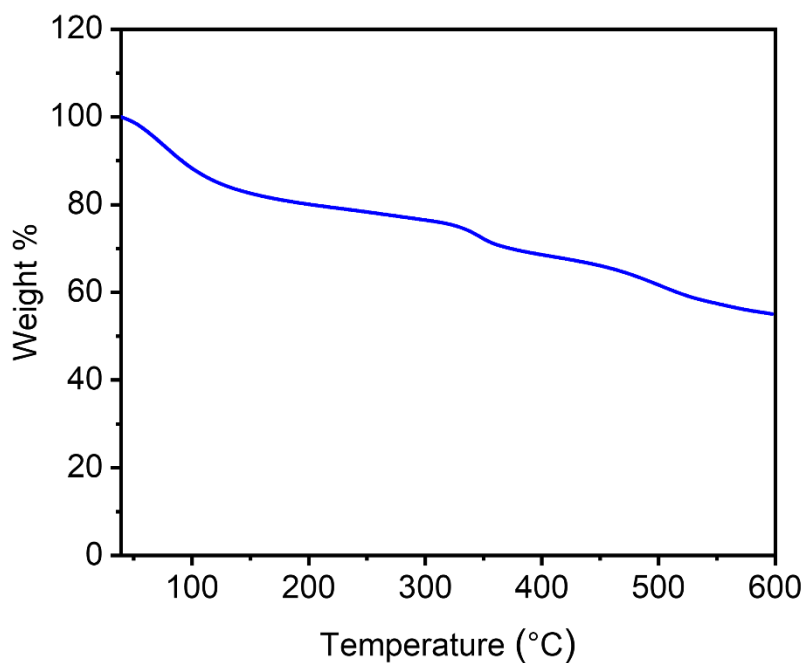

**Figure S61.** Thermogravimetric decomposition profile under N<sub>2</sub> of Mg<sub>2</sub>(dobpdc) synthesized at 0.1 M.

**Table S6.** Surface area data and yields for Mg<sub>2</sub>(dobpdc) at each synthesized concentration. Literature values for surface areas are included.

| Concentration (M) | BET Surface Area<br>(m <sup>2</sup> /g) | Langmuir Surface Area<br>(m <sup>2</sup> /g) | Yield (%) |
|-------------------|-----------------------------------------|----------------------------------------------|-----------|
| 0.1               | 2369 ± 40                               | 3011                                         | 57.9      |
| 0.5               | 1514 ± 20                               | 2206                                         | 94.4      |
| 1.0               | 1785 ± 21                               | 2445                                         | 50.9      |
| Literature        | 3270 <sup>7</sup>                       | 3873 <sup>7</sup>                            | -         |



## 4.2. Co<sub>2</sub>(dobpdc).

Prepared according to a modified literature procedure.<sup>8</sup> In a 20 mL scintillation vial, Co(NO<sub>3</sub>)<sub>2</sub>•6H<sub>2</sub>O (364 mg, 1.25 mmol, 2.50 equiv.) was dissolved in H<sub>2</sub>O (2.5 mL, 0.5 mL, or 0.25 mL for 0.1 M, 0.5 M, and 1.0 M, respectively). In a separate 20 mL scintillation vial equipped with a stir bar, NaOH (80.0 mg, 2.00 mmol, 4.00 equiv.), H<sub>4</sub>dobpdc (137 mg, 0.50 mmol, 1.00 equiv.), and H<sub>2</sub>O (2.5 mL, 0.5 mL, or 0.25 mL for 0.1 M, 0.5 M, and 1.0 M, respectively) were combined. The Co(NO<sub>3</sub>)<sub>2</sub>•H<sub>2</sub>O solution was added all at once to the H<sub>4</sub>dobpdc solution via a plastic pipette. The mixture was stirred at room temperature for 1 h. The reaction mixture was vacuum-filtered, and the resulting solid was rinsed with MeOH (10–15 mL). The resulting dark pink solid was transferred to a new scintillation vial filled with MeOH (10–15 mL). The vial was transferred to an aluminum block on a hot plate that had been pre-heated to 60 °C and was allowed to stand at this temperature for at least 12 h. At this time, the heterogenous mixture was allowed to cool to room temperature, the solvent was decanted, and fresh MeOH (10–15 mL) was added. This process was repeated for a total of six MeOH soaks. After the final soak, the solvent was decanted, and the remaining solid was allowed to dry in air. The sample was then activated using supercritical CO<sub>2</sub> (See Section 1), yielding activated Co<sub>2</sub>(dobpdc) (84.9%, 90.2%, and 47.2% yield for 0.1 M, 0.5 M, and 1.0 M, respectively) that was immediately transferred to a glass adsorption tube equipped with a Micromeritics *CheckSeal*. The sample was activated on the SmartVac under high vacuum (<10 μbar), ramping the temperature slowly to 180 °C (0.1 °C/min). The sample was allowed to stand at 180 °C under high vacuum (<10 μbar) for 12 h prior to gas adsorption analysis.

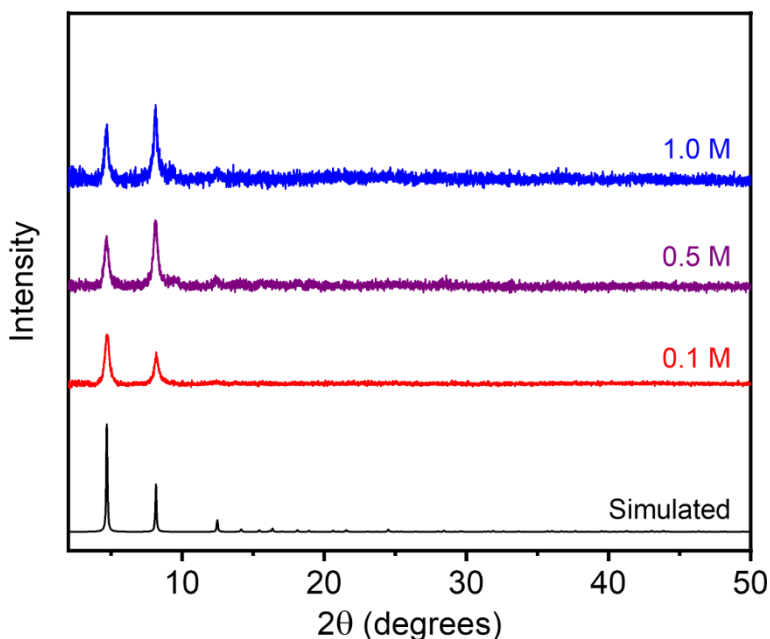

**Figure S62.** Baseline-corrected PXRD patterns ( $\lambda = 1.5406 \text{ \AA}$ ) of MeOH-solvated Co<sub>2</sub>(dobpdc) at different concentrations after aqueous synthesis. The simulated pattern based on the previously reported SCXRD structure of the isostructural framework Zn<sub>2</sub>(dobpdc) is included for reference.<sup>13</sup>

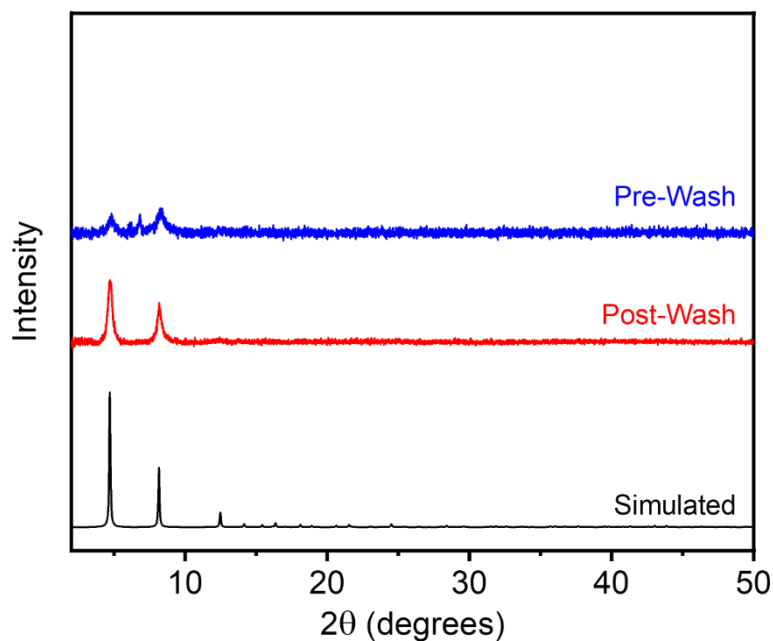

**Figure S63.** Baseline-corrected PXRD patterns ( $\lambda = 1.5406 \text{ \AA}$ ) of MeOH-solvated  $\text{Co}_2(\text{dobpdc})$  synthesized at 0.1 M before (pre-wash) and after (post-wash) soaking in MeOH. The simulated pattern based on the previously reported SCXRD structure of the isostructural framework  $\text{Zn}_2(\text{dobpdc})$  is included for reference.<sup>13</sup> The MOF shows improved crystallinity after soaking.

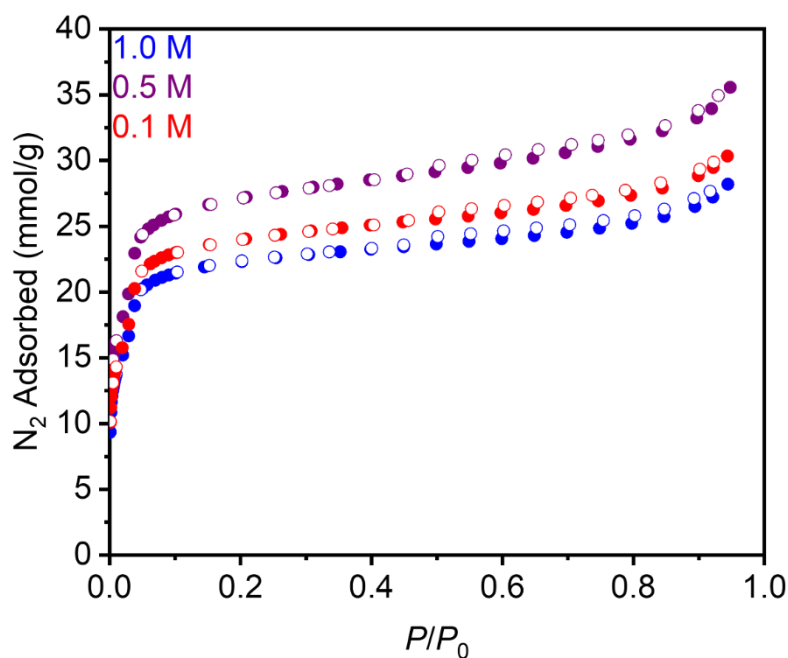

**Figure S64.** 77 K N<sub>2</sub> adsorption (filled circles) and desorption (open circles) isotherms of activated Co<sub>2</sub>(dobpdc) at different concentrations after aqueous synthesis. BET surface areas determined from these data are  $2102 \pm 40 \text{ m}^2/\text{g}$  (0.1 M),  $2371 \pm 42 \text{ m}^2/\text{g}$  (0.5 M),  $1946 \pm 39 \text{ m}^2/\text{g}$  (1.0 M). The Langmuir surface areas determined from these data are  $2767 \text{ m}^2/\text{g}$  (0.1 M),  $3197 \text{ m}^2/\text{g}$  (0.5 M), and  $2549 \text{ m}^2/\text{g}$  (1.0 M).

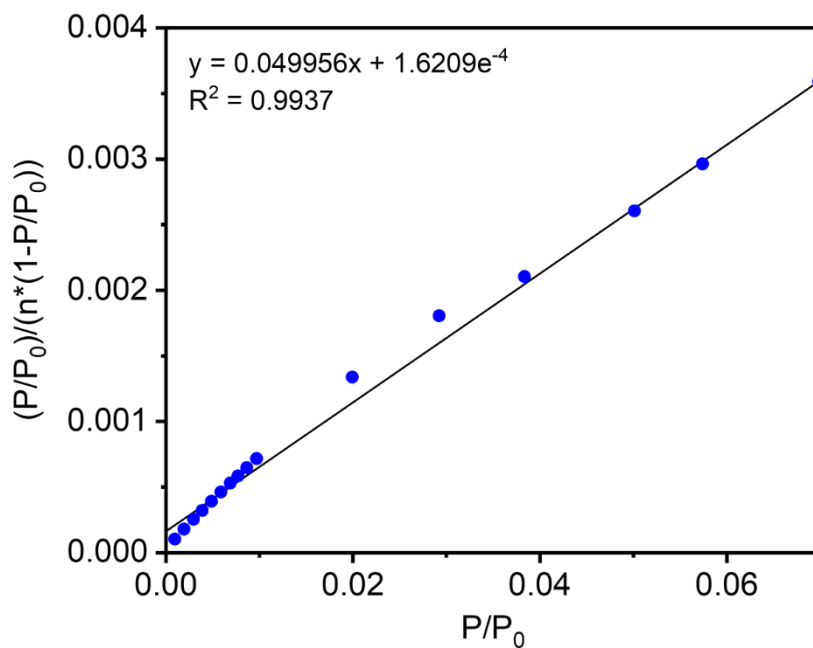

**Figure S65.** Linearized BET plot for the N<sub>2</sub> adsorption data of Co<sub>2</sub>(dobpdc) synthesized at 1.0 M.

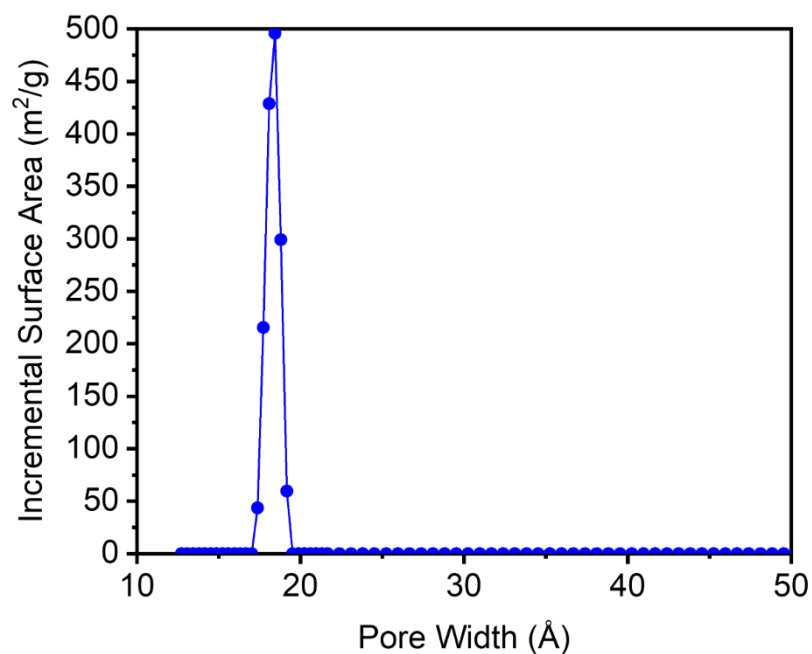

**Figure S66.** DFT-calculated pore size distribution for Co<sub>2</sub>(dobpdc) synthesized at 1.0 M, assuming a cylindrical pore geometry.

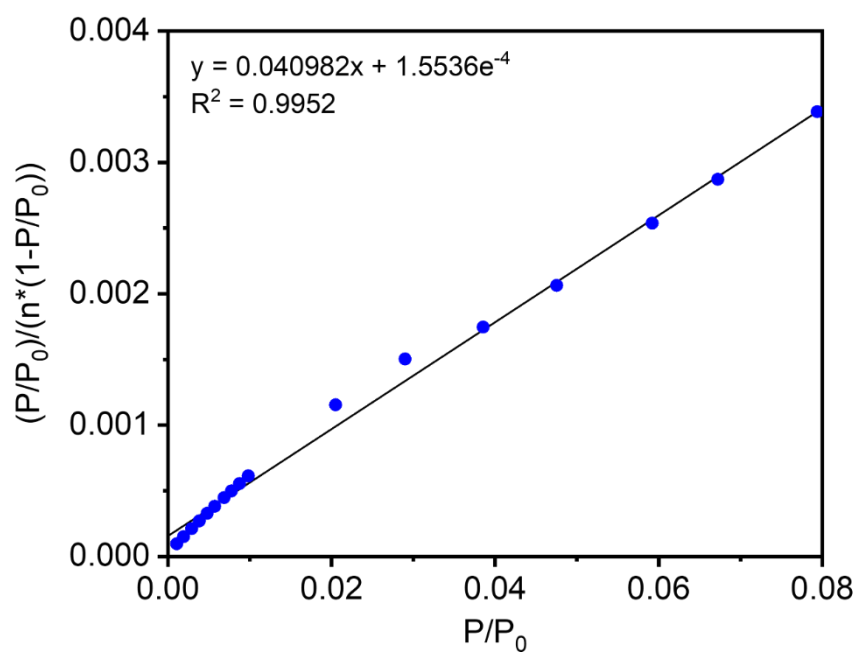

**Figure S67.** Linearized BET plot for the N<sub>2</sub> adsorption data of Co<sub>2</sub>(dobpdc) synthesized at 0.5 M.

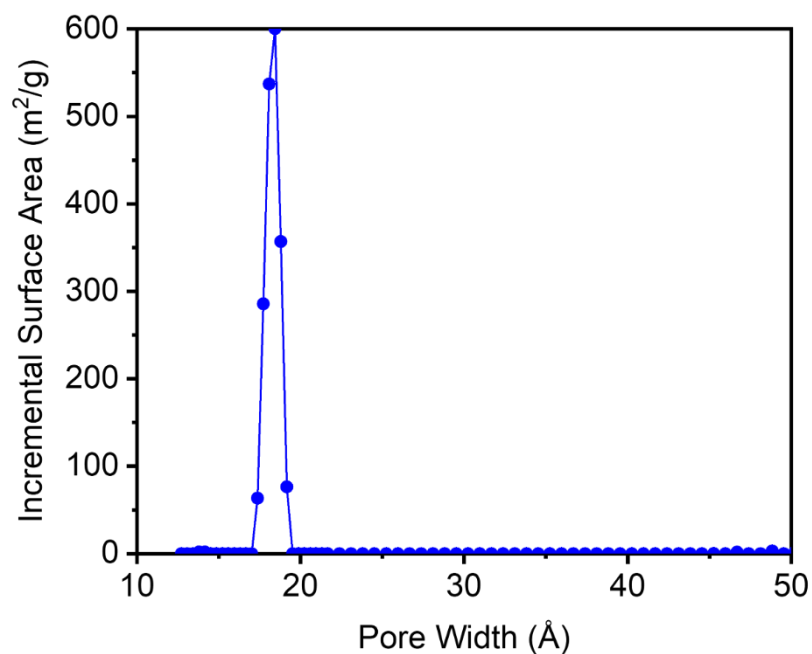

**Figure S68.** DFT-calculated pore size distribution for Co<sub>2</sub>(dobpdc) synthesized at 0.5 M, assuming a cylindrical pore geometry. The primary pore size is below the lower limit of the measurement.

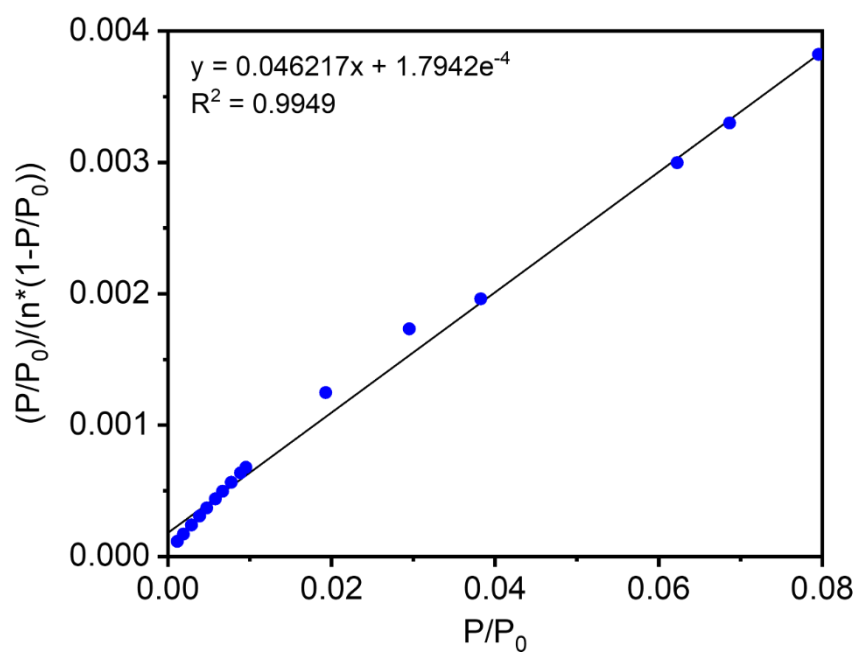

**Figure S69.** Linearized BET plot for the N<sub>2</sub> adsorption data of Co<sub>2</sub>(dobpdc) synthesized at 0.1 M.

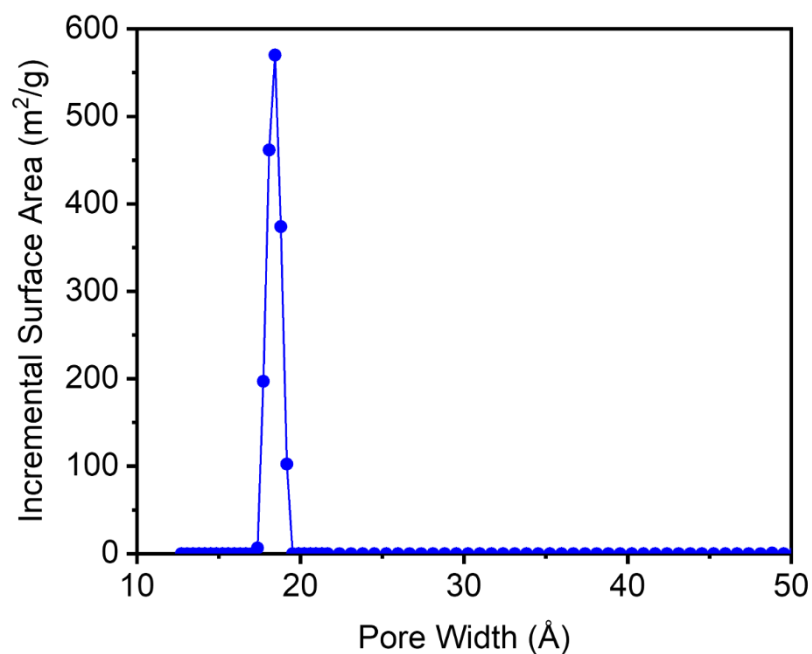

**Figure S70.** DFT-calculated pore size distribution for  $\text{Co}_2(\text{dobpdc})$  synthesized at 0.1 M, assuming a cylindrical pore geometry. The primary pore size is below the lower limit of the measurement.

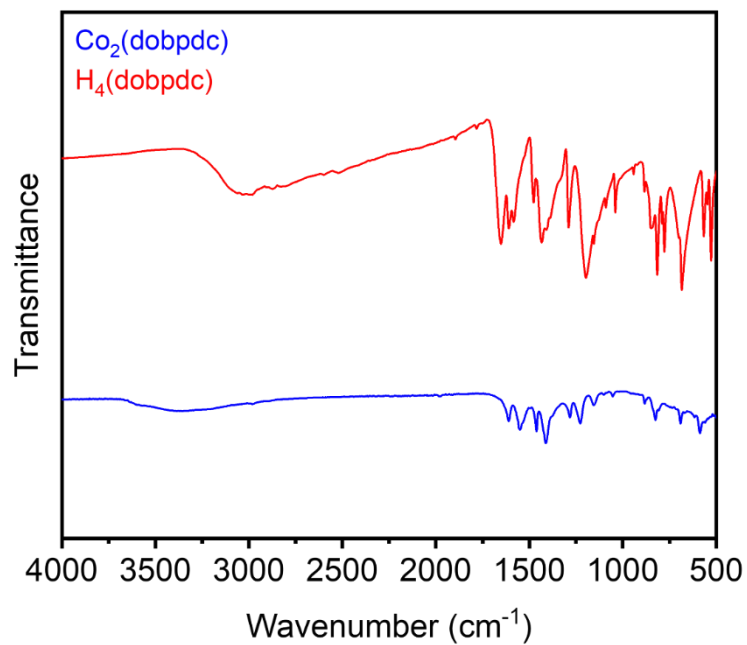

**Figure S71.** ATR-IR spectra of  $\text{Co}_2(\text{dobpdc})$  synthesized at 0.5 M and the  $\text{H}_4\text{dobpdc}$  linker.

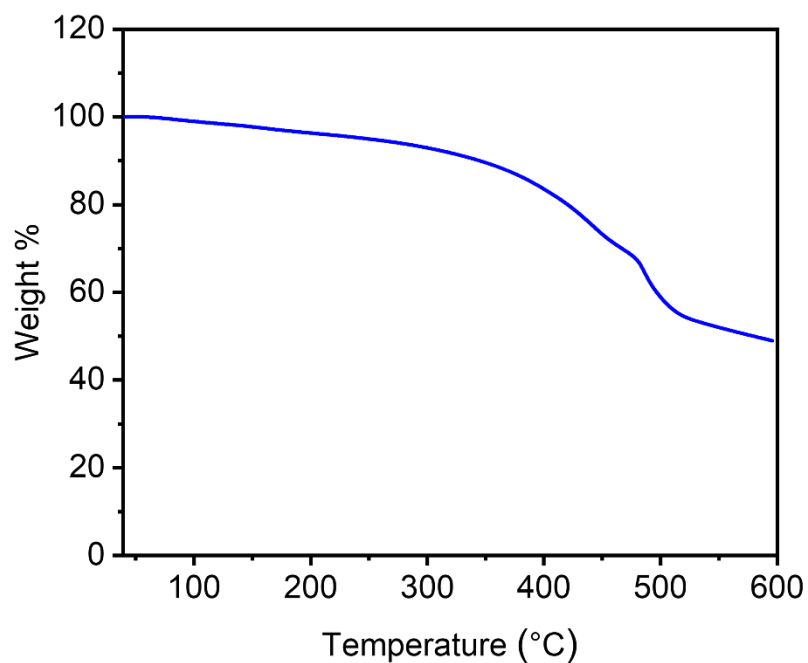

**Figure S72.** Thermogravimetric decomposition profile under N<sub>2</sub> of Co<sub>2</sub>(dobpdc) synthesized at 0.5 M.

**Table S7.** Surface area data and yields for Co<sub>2</sub>(dobpdc) at each synthesized concentration. Literature values for surface areas are included.

| Concentration (M) | BET Surface Area<br>(m <sup>2</sup> /g) | Langmuir Surface Area<br>(m <sup>2</sup> /g) | Yield (%) |
|-------------------|-----------------------------------------|----------------------------------------------|-----------|
| 0.1               | 2102 ± 40                               | 2767                                         | 84.9      |
| 0.5               | 2371 ± 42                               | 3197                                         | 90.2      |
| 1.0               | 1946 ± 39                               | 2549                                         | 47.2      |
| Literature        | 2255 <sup>7</sup>                       | 3357 <sup>7</sup>                            | -         |

### 4.3. Ni<sub>2</sub>(dobpdc).

Prepared according to a modified literature procedure.<sup>8</sup> In a 20 mL scintillation vial, Ni(NO<sub>3</sub>)<sub>2</sub>•6H<sub>2</sub>O (364 mg, 1.25 mmol, 2.50 equiv.) was dissolved in H<sub>2</sub>O (2.5 mL, 0.5 mL, or 0.25 mL for 0.1 M, 0.5 M, and 1.0 M, respectively). In a separate 20 mL scintillation vial equipped with a stir bar, NaOH (80.0 mg, 2.00 mmol, 4.00 equiv.), H<sub>4</sub>dobpdc (137 mg, 0.50 mmol, 1.00 equiv.), and H<sub>2</sub>O (2.5 mL, 0.5 mL, or 0.25 mL for 0.1 M, 0.5 M, and 1.0 M, respectively) were combined. The Ni(NO<sub>3</sub>)<sub>2</sub>•H<sub>2</sub>O solution was added all at once to the H<sub>4</sub>dobpdc solution via a plastic pipette. The mixture was stirred at room temperature for 1 h. The reaction mixture was vacuum-filtered, and the resulting solid was rinsed with MeOH (10–15 mL). The resulting green solid was transferred to a new scintillation vial filled with MeOH (10–15 mL). The vial was transferred to an aluminum block on a hot plate that had been pre-heated to 60 °C and was allowed to stand at this temperature for at least 12 h. At this time, the heterogenous mixture was allowed to cool to room temperature, the solvent was decanted, and fresh MeOH (10–15 mL) was added. This process was repeated for a total of six MeOH soaks. After the final soak, the solvent was decanted, and the remaining solid was allowed to dry in air. The sample was then activated using supercritical CO<sub>2</sub> (See Section 1), yielding activated Ni<sub>2</sub>(dobpdc) (91.1%, 51.8%, and 30.5% yield for 0.1 M, 0.5 M, and 1.0 M, respectively) that was immediately transferred to a glass adsorption tube equipped with a Micromeritics *CheckSeal*. The sample was activated on the SmartVac under high vacuum (<10 μbar), ramping the temperature slowly to 180 °C (0.1 °C/min). The sample was allowed to stand at 180 °C under high vacuum (<10 μbar) for 12 h prior to gas adsorption analysis.

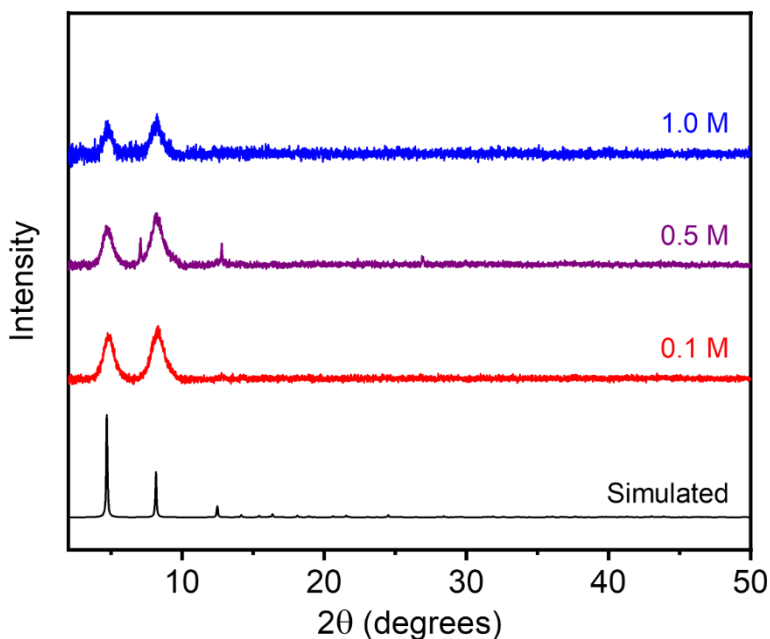

**Figure S73.** Baseline-corrected PXRD patterns ( $\lambda = 1.5406 \text{ \AA}$ ) of MeOH-solvated Ni<sub>2</sub>(dobpdc) at different concentrations after aqueous synthesis. The simulated pattern based on the previously reported SCXRD structure of the isostructural framework Zn<sub>2</sub>(dobpdc) is included for reference.<sup>13</sup>



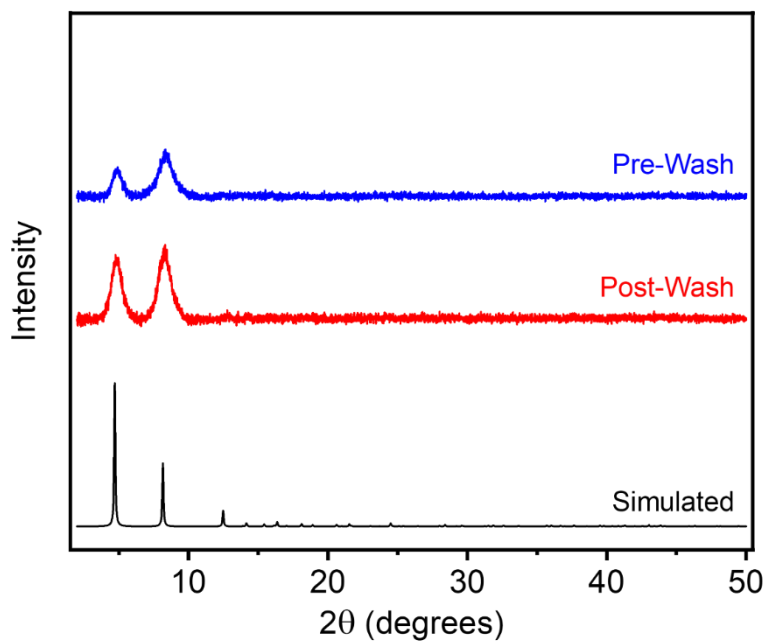

**Figure S74.** Baseline-corrected PXRD patterns ( $\lambda = 1.5406 \text{ \AA}$ ) of MeOH-solvated  $\text{Ni}_2(\text{dobpdc})$  synthesized at 0.1 M before (pre-wash) and after (post-wash) soaking in MeOH. The simulated pattern based on the previously reported SCXRD structure of the isostructural framework  $\text{Zn}_2(\text{dobpdc})$  is included for reference.<sup>13</sup> No significant change in the pattern was observed upon soaking the MOF in MeOH.

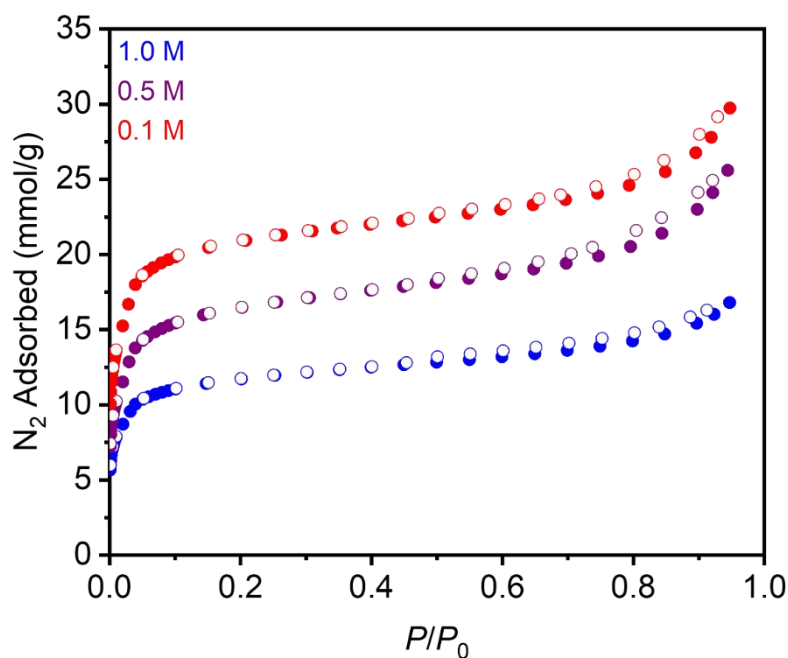

**Figure S75.** 77 K N<sub>2</sub> adsorption (filled circles) and desorption (open circles) isotherms of activated Ni<sub>2</sub>(dobpdc) at different concentrations after aqueous synthesis. BET surface areas determined from these data are  $1794 \pm 17 \text{ m}^2/\text{g}$  (0.1 M),  $1393 \pm 12 \text{ m}^2/\text{g}$  (0.5 M), and  $992 \pm 8 \text{ m}^2/\text{g}$  (1.0 M). The Langmuir surface areas determined from these data are  $2542 \text{ m}^2/\text{g}$  (0.1 M),  $2143 \text{ m}^2/\text{g}$  (0.5 M), and  $1459 \text{ m}^2/\text{g}$  (1.0 M).

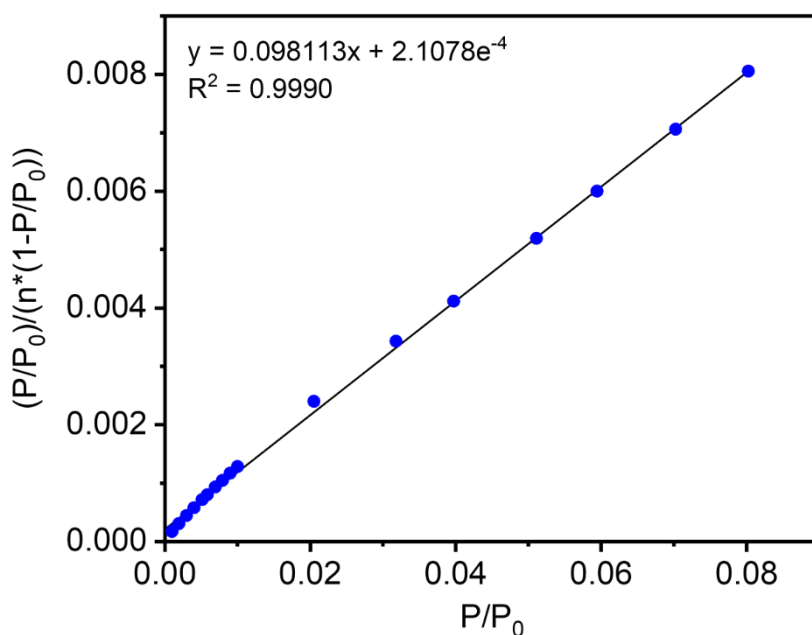

**Figure S76.** Linearized BET plot for the N<sub>2</sub> adsorption data of Ni<sub>2</sub>(dobpdc) synthesized at 1.0 M.

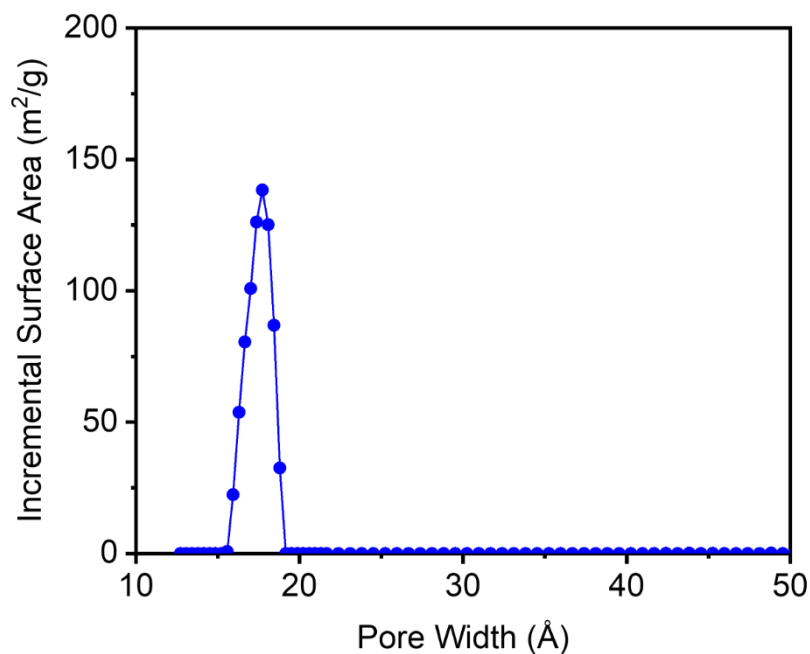

**Figure S77.** DFT-calculated pore size distribution for  $\text{Ni}_2(\text{dobpdc})$  synthesized at 1.0 M, assuming a cylindrical pore geometry.

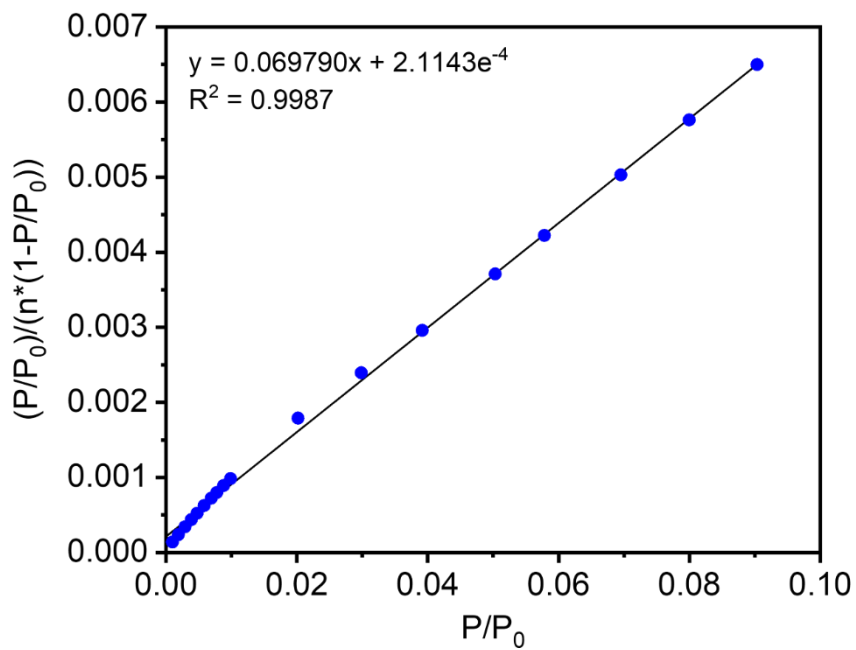

**Figure S78.** Linearized BET plot for the  $\text{N}_2$  adsorption data of  $\text{Ni}_2(\text{dobpdc})$  synthesized at 0.5 M.

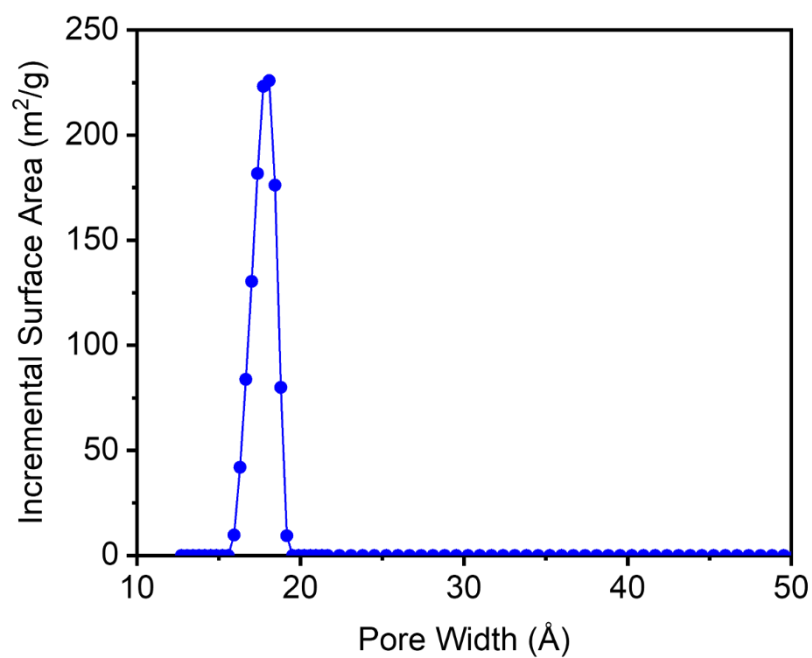

**Figure S79.** DFT-calculated pore size distribution for Ni<sub>2</sub>(dobpdc) synthesized at 0.5 M, assuming a cylindrical pore geometry.

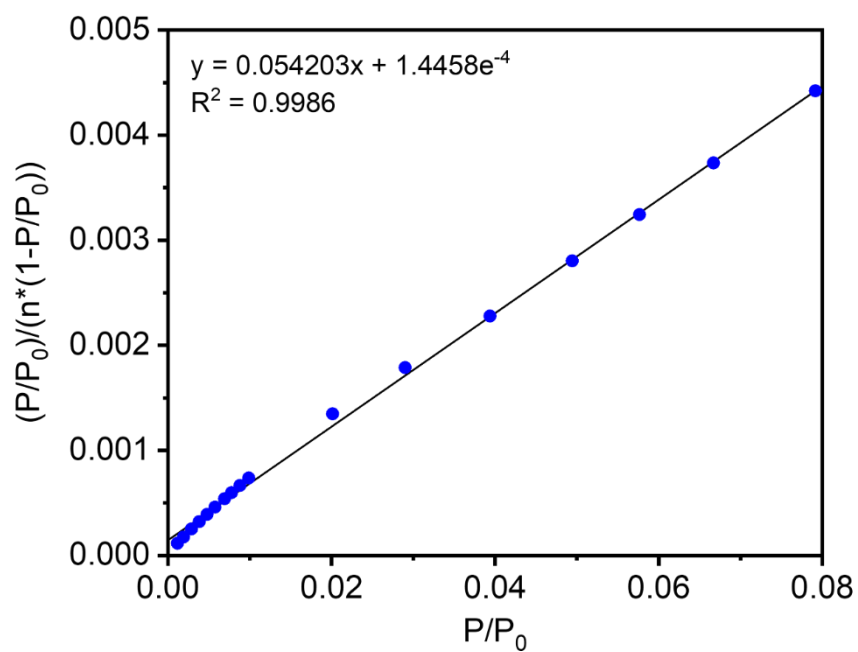

**Figure S80.** Linearized BET plot for the N<sub>2</sub> adsorption data of Ni<sub>2</sub>(dobpdc) synthesized at 0.1 M.

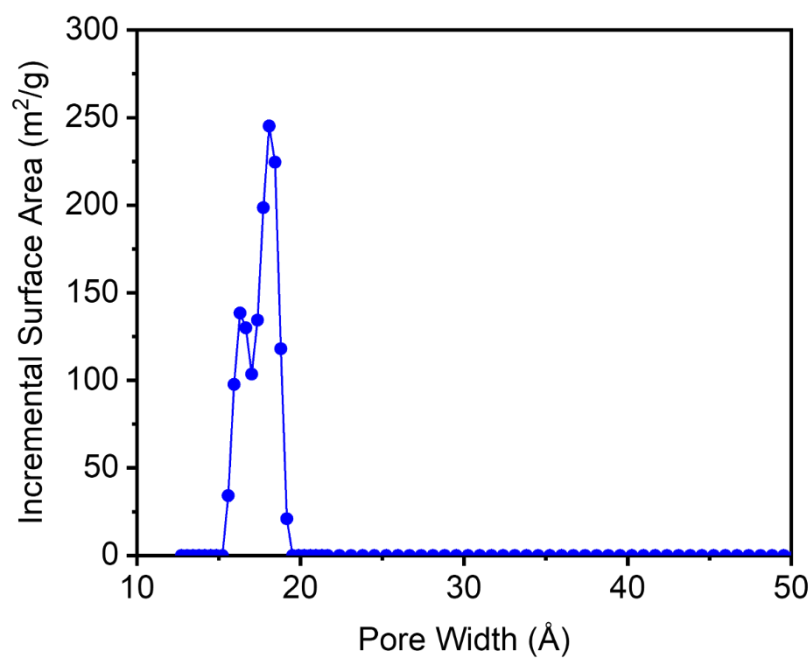

**Figure S81.** DFT-calculated pore size distribution for  $\text{Ni}_2(\text{dobpdc})$  synthesized at 0.1 M, assuming a cylindrical pore geometry.

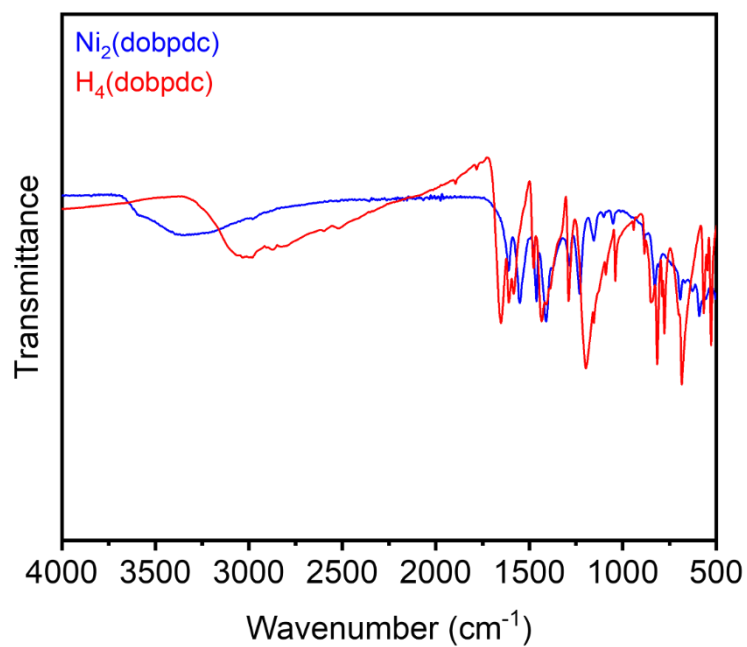

**Figure S82.** ATR-IR spectra of  $\text{Ni}_2(\text{dobpdc})$  synthesized at 0.1 M and the  $\text{H}_4\text{dobpdc}$  linker.

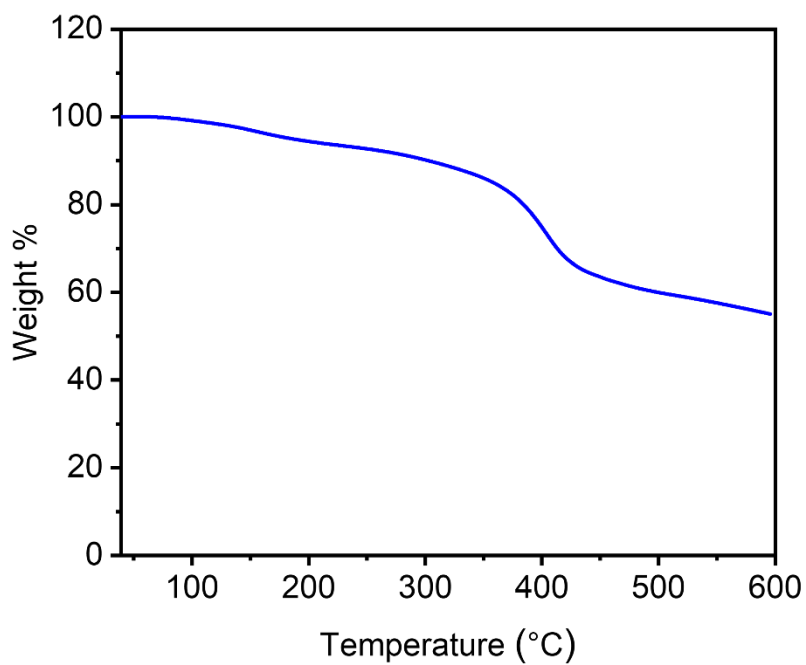

**Figure S83.** Thermogravimetric decomposition profile under N<sub>2</sub> of Ni<sub>2</sub>(dobpdc) synthesized at 0.1 M.

**Table S8.** Surface area data and yields for Ni<sub>2</sub>(dobpdc) at each synthesized concentration. Literature values for surface areas are included.

| Concentration (M) | BET Surface Area (m <sup>2</sup> /g) | Langmuir Surface Area (m <sup>2</sup> /g) | Yield (%) |
|-------------------|--------------------------------------|-------------------------------------------|-----------|
| 0.1               | 1794 ± 17                            | 2542                                      | 91.1      |
| 0.5               | 1393 ± 12                            | 2143                                      | 51.8      |
| 1.0               | 992 ± 8                              | 1459                                      | 30.5      |
| Literature        | 2059 <sup>7</sup>                    | 3108 <sup>7</sup>                         | -         |

#### 4.4. Zn<sub>2</sub>(dobpdc).

Prepared according to a modified literature procedure.<sup>8</sup> In a 20 mL scintillation vial, Zn(NO<sub>3</sub>)<sub>2</sub>•6H<sub>2</sub>O (372 mg, 1.25 mmol, 2.50 equiv.) was dissolved in H<sub>2</sub>O (2.5 mL, 0.5 mL, or 0.25 mL for 0.1 M, 0.5 M, and 1.0 M, respectively). In a separate 20 mL scintillation vial equipped with a stir bar, NaOH (80.0 mg, 2.00 mmol, 4.00 equiv.), H<sub>4</sub>dobpdc (137 mg, 0.50 mmol, 1.00 equiv.), and H<sub>2</sub>O (2.5 mL, 0.5 mL, or 0.25 mL for 0.1 M, 0.5 M, and 1.0 M, respectively) were combined. The Zn(NO<sub>3</sub>)<sub>2</sub>•H<sub>2</sub>O solution was added all at once to the H<sub>4</sub>dobpdc solution via a plastic pipette. The mixture was stirred at room temperature for 1 h. The reaction mixture was vacuum-filtered, and the resulting solid was rinsed with MeOH (10–15 mL). The resulting off-white solid was transferred to a new scintillation vial filled with MeOH (10–15 mL). The vial was transferred to an aluminum block on a hot plate that had been pre-heated to 60 °C and was allowed to stand at this temperature for at least 12 h. At this time, the heterogenous mixture was allowed to cool to room temperature, the solvent was decanted, and fresh MeOH (10–15 mL) was added. This process was repeated for a total of six MeOH soaks. After the final soak, the solvent was decanted, and the remaining solid was allowed to dry in air. The sample was then activated using supercritical CO<sub>2</sub> (See Section 1), yielding activated Zn<sub>2</sub>(dobpdc) (87.8%, 59.6%, and 69.0% yield for 0.1 M, 0.5 M, and 1.0 M, respectively) that was immediately transferred to a glass adsorption tube equipped with a Micromeritics *CheckSeal*. The sample was activated on the SmartVac under high vacuum (<10 μbar), ramping the temperature slowly to 180 °C (0.1 °C/min). The sample was allowed to stand at 180 °C under high vacuum (<10 μbar) for 12 h prior to gas adsorption analysis.

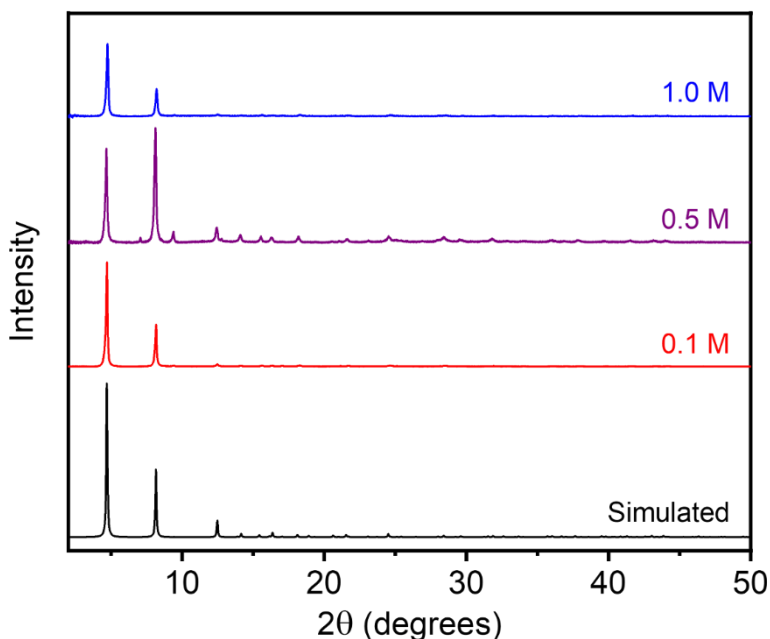

**Figure S84.** Baseline-corrected PXRD patterns ( $\lambda = 1.5406 \text{ \AA}$ ) of MeOH-solvated Zn<sub>2</sub>(dobpdc) at different concentrations after aqueous synthesis. The simulated pattern based on the previously reported SCXRD structure of the isostructural framework Zn<sub>2</sub>(dobpdc) is included for reference.<sup>13</sup>

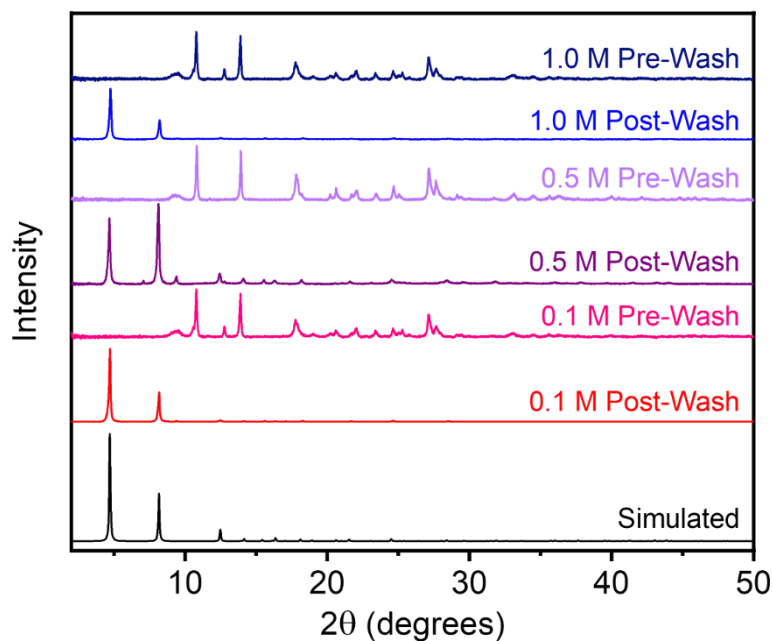

**Figure S85.** Baseline-corrected PXRD patterns ( $\lambda = 1.5406 \text{ \AA}$ ) of MeOH-solvated  $\text{Zn}_2(\text{dobpdc})$  synthesized at different concentrations before (pre-wash) and after (post-wash) soaking in MeOH. The simulated pattern based on the previously reported SCXRD structure of the isostructural framework  $\text{Zn}_2(\text{dobpdc})$  is included for reference.<sup>13</sup> A different phase or mixture of phases is obtained initially at all concentrations that transformations into  $\text{Zn}_2(\text{dobpdc})$  upon soaking in MeOH. Indexing the powder data of these samples did not produce definitive unit cell parameters.



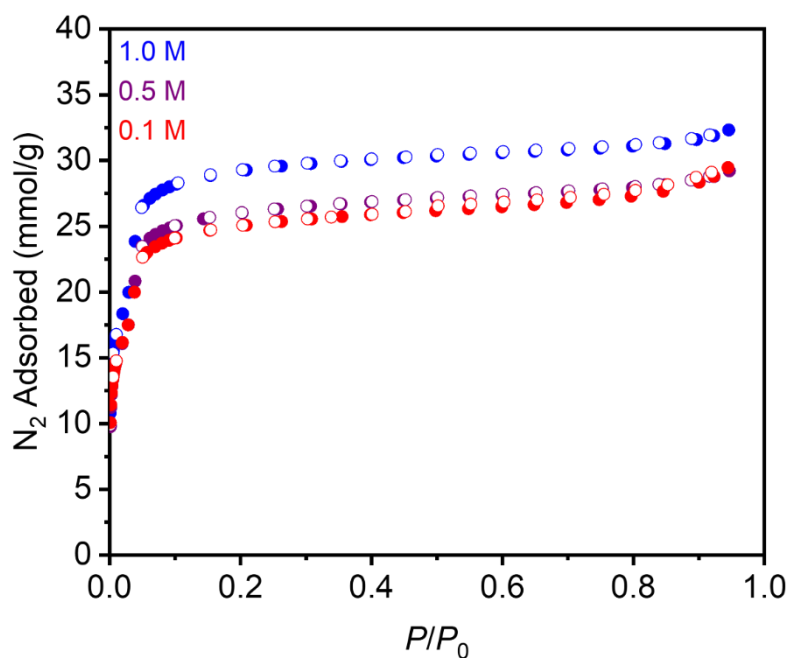

**Figure S86.** 77 K N<sub>2</sub> adsorption (filled circles) and desorption (open circles) isotherms of activated Zn<sub>2</sub>(dobpdc) at different concentrations after aqueous synthesis. BET surface areas determined from these data are  $2190 \pm 60 \text{ m}^2/\text{g}$  (0.1 M),  $2285 \pm 70 \text{ m}^2/\text{g}$  (0.5 M),  $2574 \pm 77 \text{ m}^2/\text{g}$  (1.0 M). The Langmuir surface areas determined from these data are  $2743 \text{ m}^2/\text{g}$  (0.1 M),  $2783 \text{ m}^2/\text{g}$  (0.5 M), and  $3090 \text{ m}^2/\text{g}$  (1.0 M).

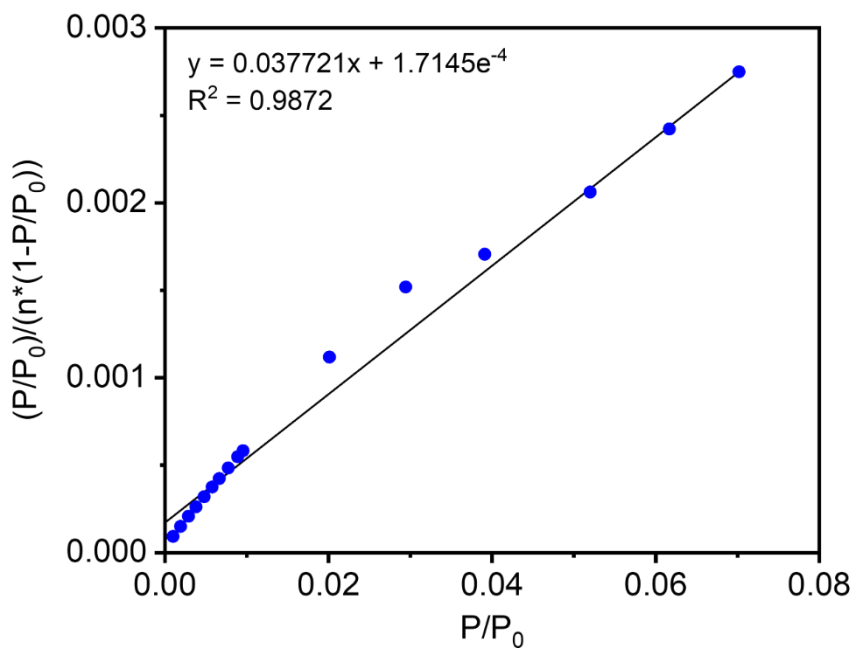

**Figure S87.** Linearized BET plot for the N<sub>2</sub> adsorption data of Zn<sub>2</sub>(dobpdc) synthesized at 1.0 M.

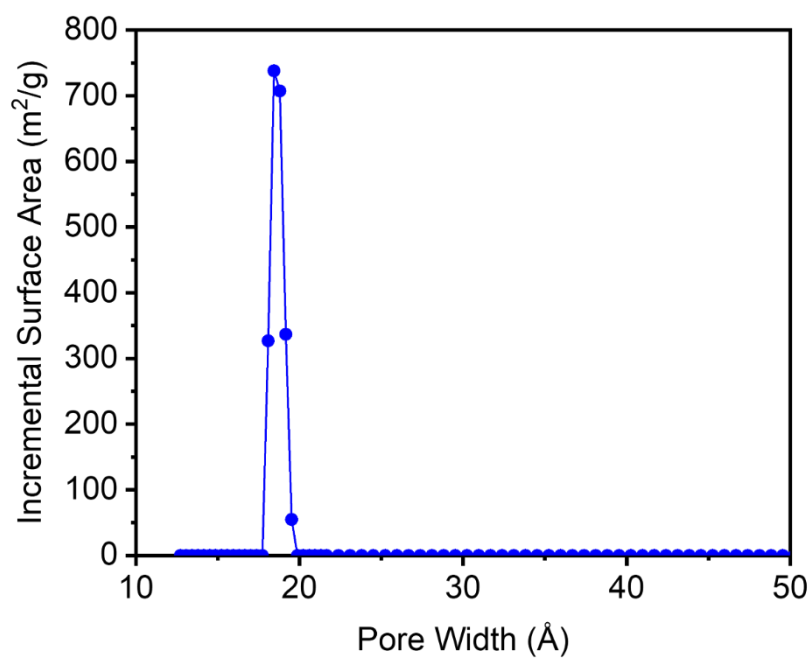

**Figure S88.** DFT-calculated pore size distribution for  $\text{Zn}_2(\text{dobpdc})$  synthesized at 1.0 M, assuming a cylindrical pore geometry.

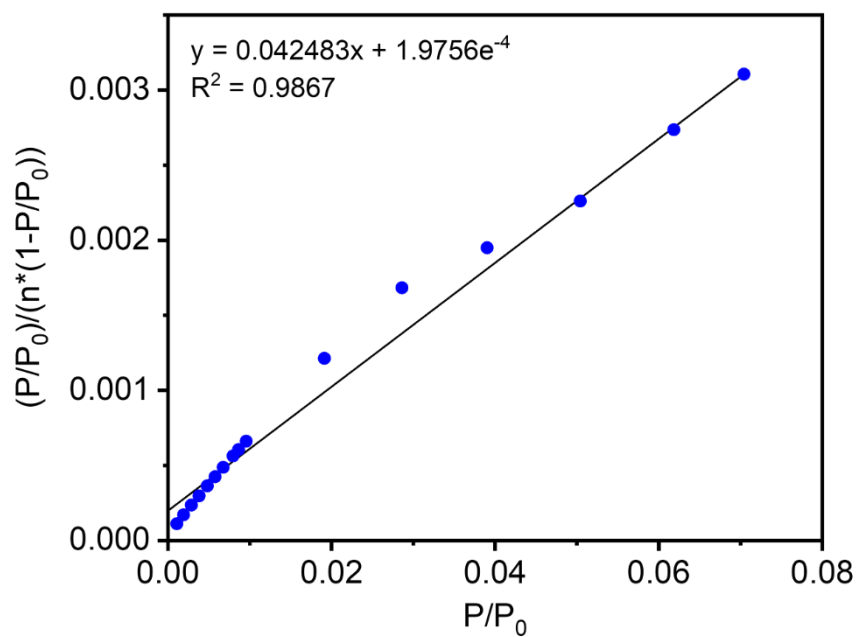

**Figure S89.** Linearized BET plot for the  $\text{N}_2$  adsorption data of  $\text{Zn}_2(\text{dobpdc})$  synthesized at 0.5 M.

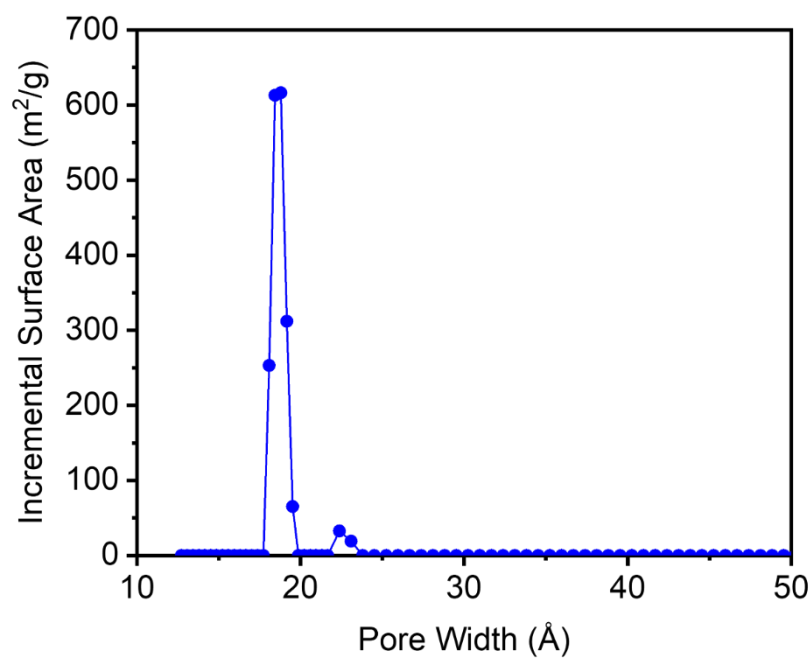

**Figure S90.** DFT-calculated pore size distribution for  $\text{Zn}_2(\text{dobpdc})$  synthesized at 0.5 M, assuming a cylindrical pore geometry.

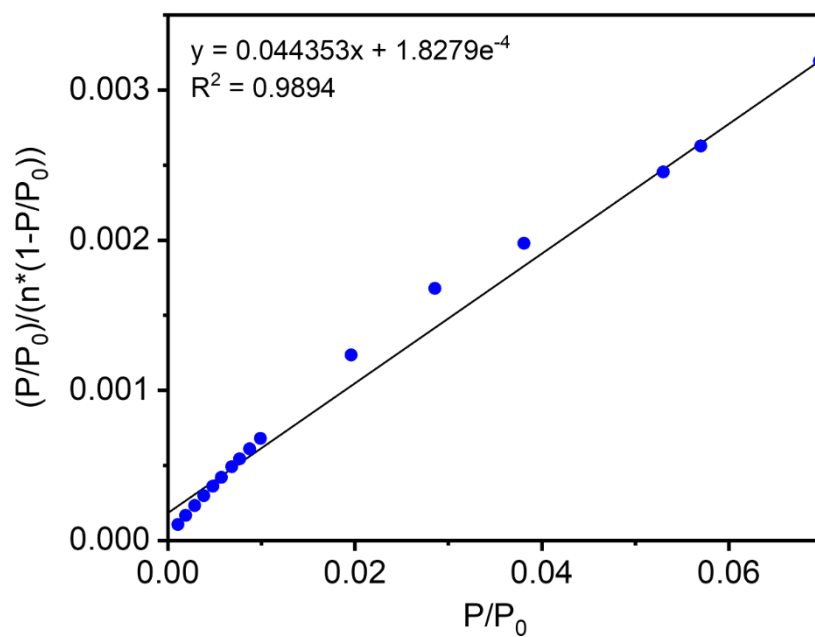

**Figure S91.** Linearized BET plot for the  $\text{N}_2$  adsorption data of  $\text{Zn}_2(\text{dobpdc})$  synthesized at 0.1 M.

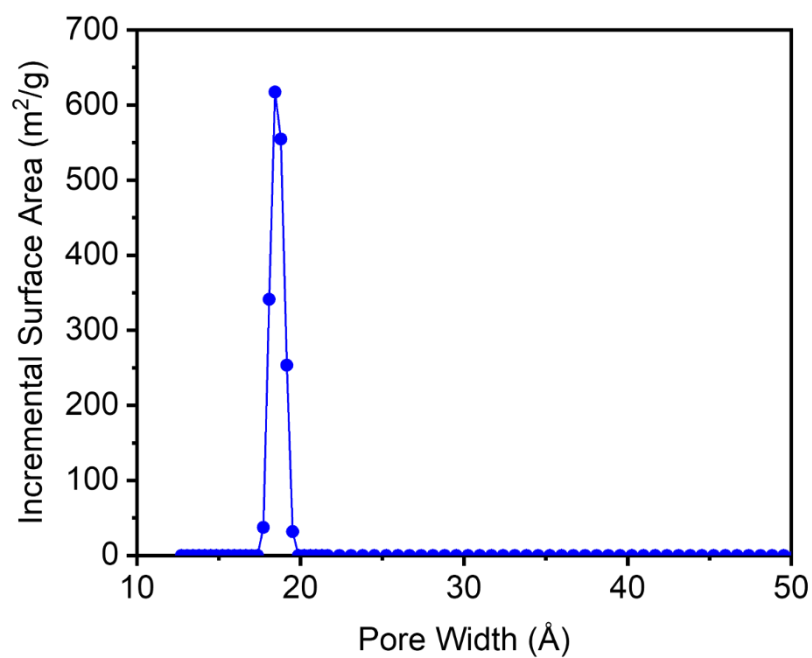

**Figure S92.** DFT-calculated pore size distribution for  $\text{Zn}_2(\text{dobpdc})$  synthesized at 0.1 M, assuming a cylindrical pore geometry.

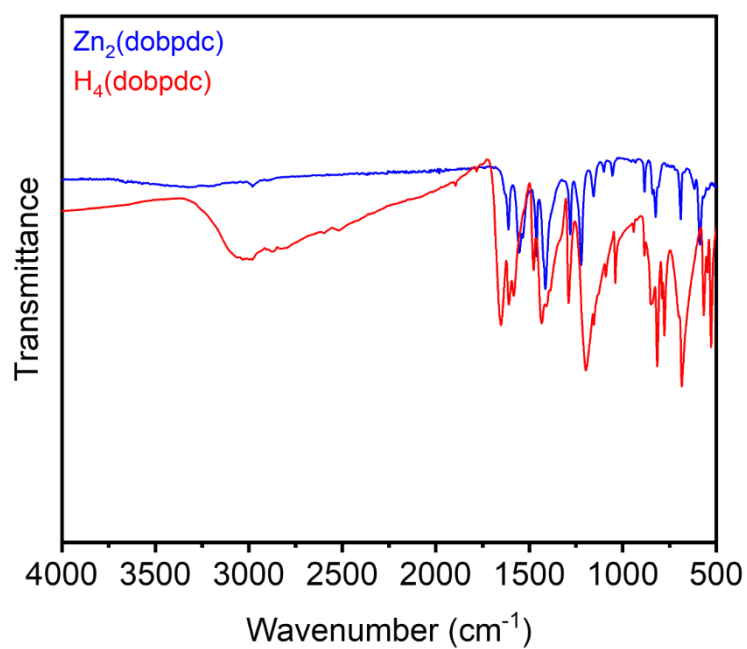

**Figure S93.** ATR-IR spectra of  $\text{Zn}_2(\text{dobpdc})$  synthesized at 1.0 M and the  $\text{H}_4\text{dobpdc}$  linker.

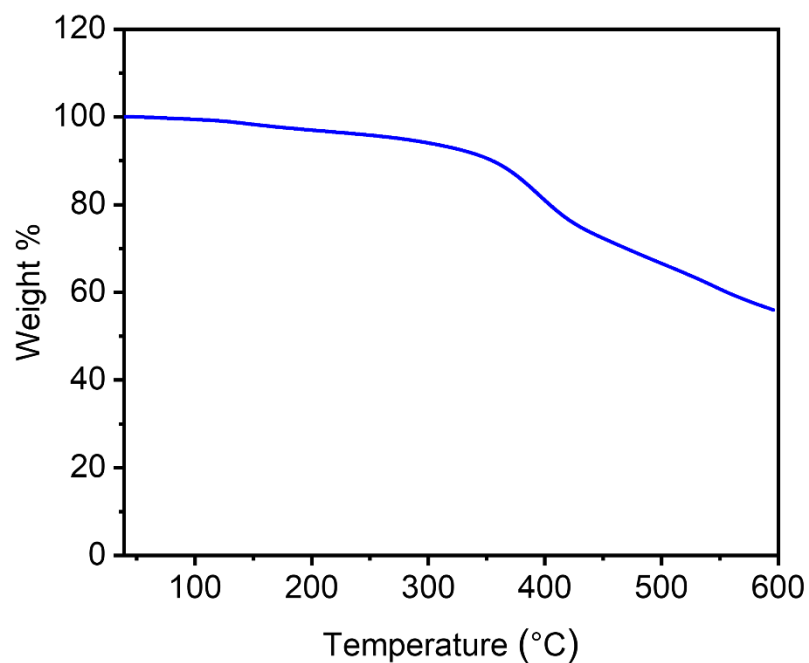

**Figure S94.** Thermogravimetric decomposition profile under N<sub>2</sub> of Zn<sub>2</sub>(dobpdc) synthesized at 1.0 M.

**Table S9.** Surface area data and yields for Zn<sub>2</sub>(dobpdc) at each synthesized concentration. Literature values for surface areas are included.

| Concentration (M) | BET Surface Area<br>(m <sup>2</sup> /g) | Langmuir Surface Area<br>(m <sup>2</sup> /g) | Yield (%) |
|-------------------|-----------------------------------------|----------------------------------------------|-----------|
| 0.1               | 2190 ± 60                               | 2743                                         | 87.8      |
| 0.5               | 2285 ± 70                               | 2783                                         | 59.6      |
| 1.0               | 2574 ± 77                               | 3090                                         | 69.0      |
| Literature        | 1873 <sup>7</sup>                       | 2974 <sup>7</sup>                            | -         |

## 5. High-concentration aqueous syntheses of $M_2(m\text{-dobdc})$ MOFs.

### 5.1. $Mg_2(m\text{-dobdc})$ .

Prepared according to a modified literature procedure.<sup>8</sup> In a 20 mL scintillation vial,  $Mg(NO_3)_2 \cdot 6H_2O$  (321 mg, 1.25 mmol, 2.50 equiv.) was dissolved in  $H_2O$  (2.5 mL, 0.5 mL, or 0.25 mL for 0.1 M, 0.5 M, and 1.0 M, respectively). In a separate 20 mL scintillation vial equipped with a stir bar, NaOH (80.0 mg, 2.00 mmol, 4.00 equiv.),  $H_4m\text{-dobdc}$  (99.0 mg, 0.50 mmol, 1.00 equiv.), and  $H_2O$  (2.5 mL, 0.5 mL, or 0.25 mL for 0.1 M, 0.5 M, and 1.0 M, respectively) were combined. The  $Mg(NO_3)_2 \cdot H_2O$  solution was added all at once to the  $H_4m\text{-dobdc}$  solution via a plastic pipette. The mixture was stirred at room temperature for 1 h. The reaction mixture was vacuum-filtered, and the resulting solid was rinsed with MeOH (10–15 mL). The resulting off-white/salmon-colored solid was transferred to a new scintillation vial filled with MeOH (10–15 mL). The vial was transferred to an aluminum block on a hot plate that had been pre-heated to 60 °C and was allowed to stand at this temperature for at least 12 h. At this time, the heterogenous mixture was allowed to cool to room temperature, the solvent was decanted, and fresh MeOH (10–15 mL) was added. This process was repeated for a total of six MeOH soaks. After the final soak, the solvent was decanted, and the remaining solid was allowed to dry in air. The sample was then activated using supercritical  $CO_2$  (See Section 1), yielding activated  $Mg_2(m\text{-dobdc})$  (26.8%, 43.7%, and 69.2% yield for 0.1 M, 0.5 M, and 1.0 M, respectively) that was immediately transferred to a glass adsorption tube equipped with a Micromeritics *CheckSeal*. The sample was activated on the SmartVac under high vacuum (<10  $\mu$ bar), ramping the temperature slowly to 180 °C (0.1°C/min). The sample was allowed to stand at 180 °C under high vacuum (<10  $\mu$ bar) for 12 h prior to gas adsorption analysis.

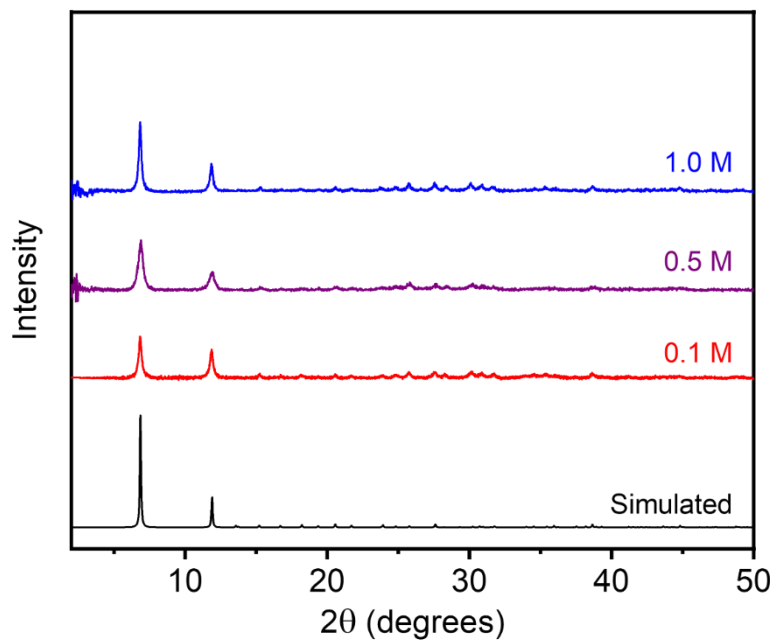

**Figure S95.** Baseline-corrected PXRD patterns ( $\lambda = 1.5406 \text{ \AA}$ ) of MeOH-solvated  $\text{Mg}_2(m\text{-dobdc})$  at different concentrations after aqueous synthesis. The simulated pattern based on the previously reported SCXRD structure of the isostructural framework  $\text{Co}_2(m\text{-dobdc})$  is included for reference.<sup>14</sup>

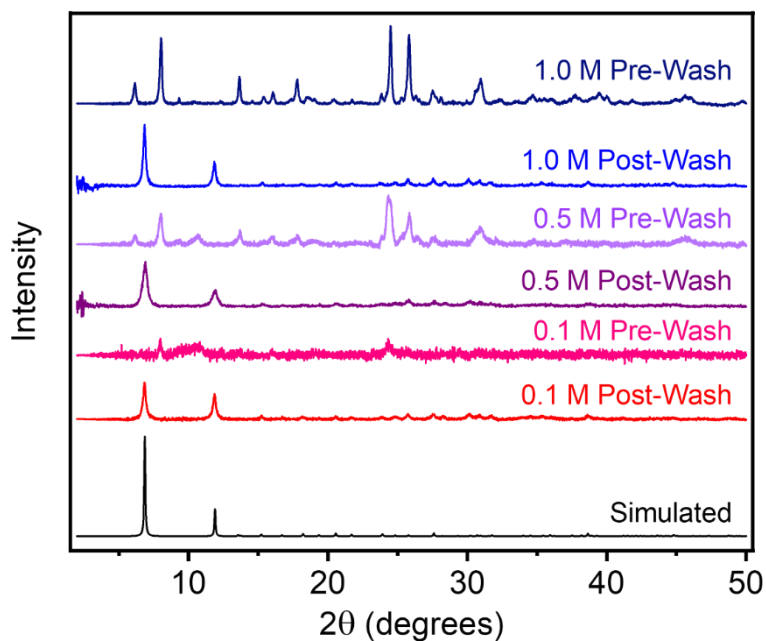

**Figure S96.** Baseline-corrected PXRD patterns ( $\lambda = 1.5406 \text{ \AA}$ ) of  $\text{Mg}_2(m\text{-dobdc})$  synthesized at different concentrations before (pre-wash) and after (post-wash) soaking in MeOH. The simulated pattern based on the previously reported SCXRD structure of the isostructural framework  $\text{Co}_2(m\text{-dobdc})$  is included for reference.<sup>14</sup> A different phase or mixture of phases is obtained initially at all concentrations that transformations into  $\text{Mg}_2(m\text{-dobdc})$  upon soaking in MeOH. Indexing the powder data did not produce definitive unit cell parameters.



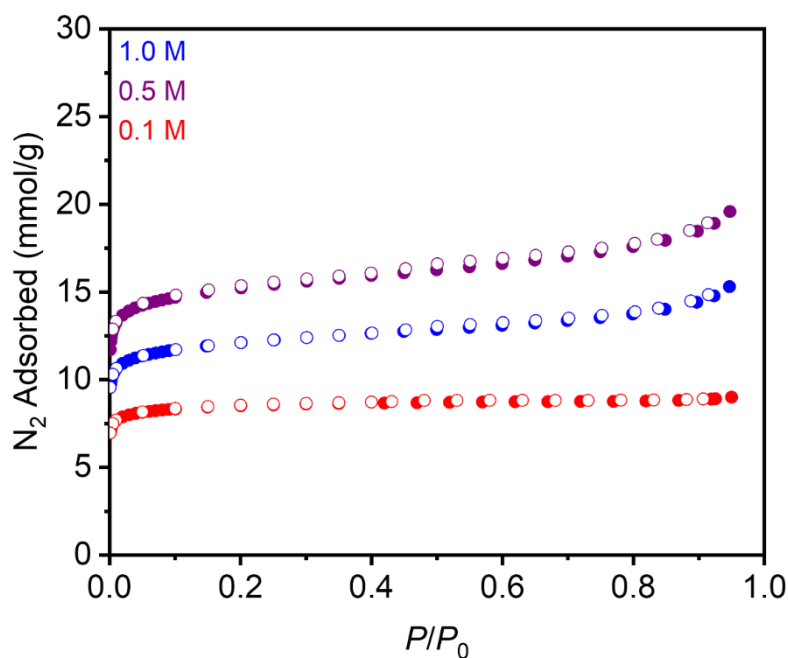

**Figure S97.** 77 K N<sub>2</sub> adsorption (filled circles) and desorption (open circles) isotherms of activated Mg<sub>2</sub>(*m*-dobdc) at different concentrations after aqueous synthesis. BET surface areas determined from these data are  $762 \pm 1 \text{ m}^2/\text{g}$  (0.1 M),  $1330 \pm 2 \text{ m}^2/\text{g}$  (0.5 M), and  $1060 \pm 1 \text{ m}^2/\text{g}$  (1.0 M). The Langmuir surface areas determined from these data are  $865 \text{ m}^2/\text{g}$  (0.1 M),  $1767 \text{ m}^2/\text{g}$  (0.5 M), and  $1383 \text{ m}^2/\text{g}$  (1.0 M).

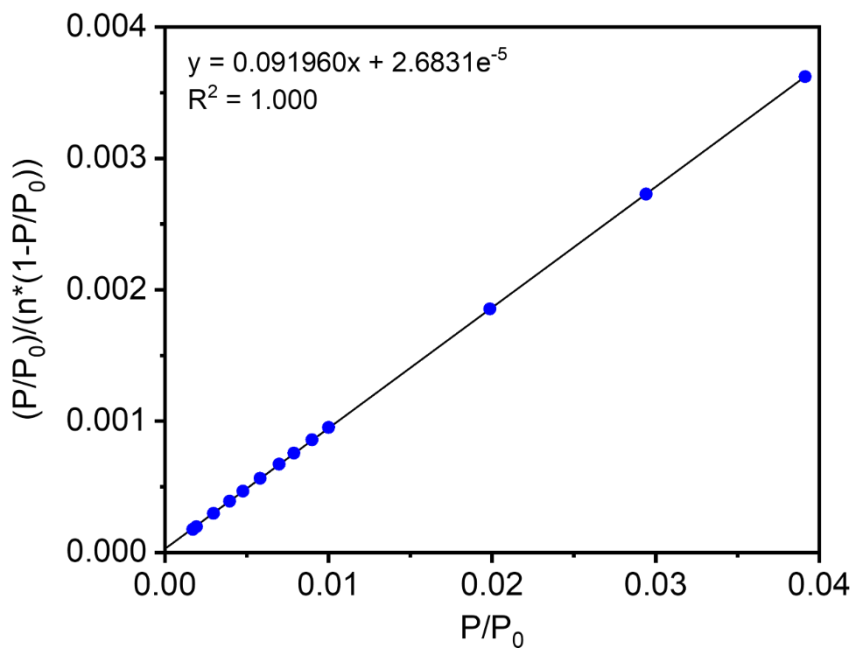

**Figure S98.** Linearized BET plot for the N<sub>2</sub> adsorption data of Mg<sub>2</sub>(*m*-dobdc) synthesized at 1.0 M.

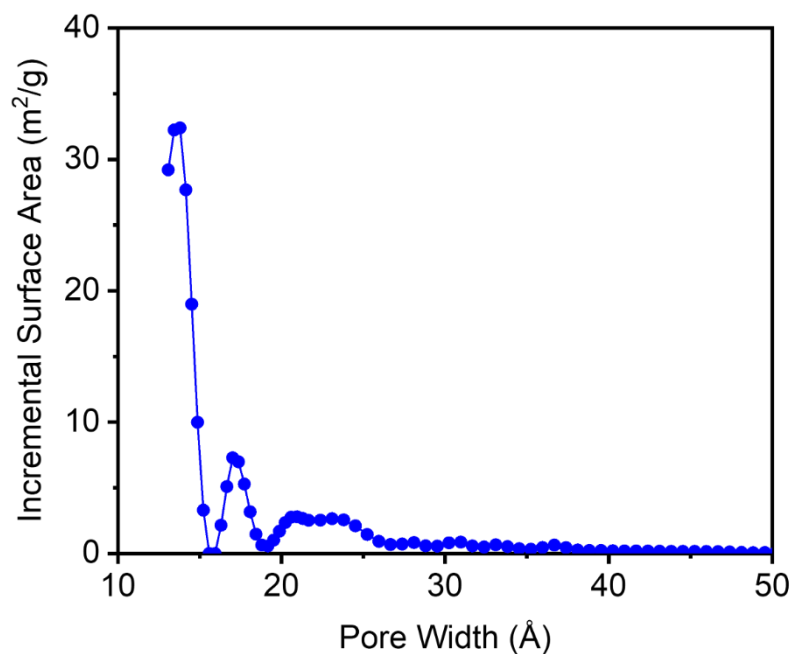

**Figure S99.** DFT-calculated pore size distribution for  $\text{Mg}_2(m\text{-dobdc})$  synthesized at 1.0 M, assuming a cylindrical pore geometry.

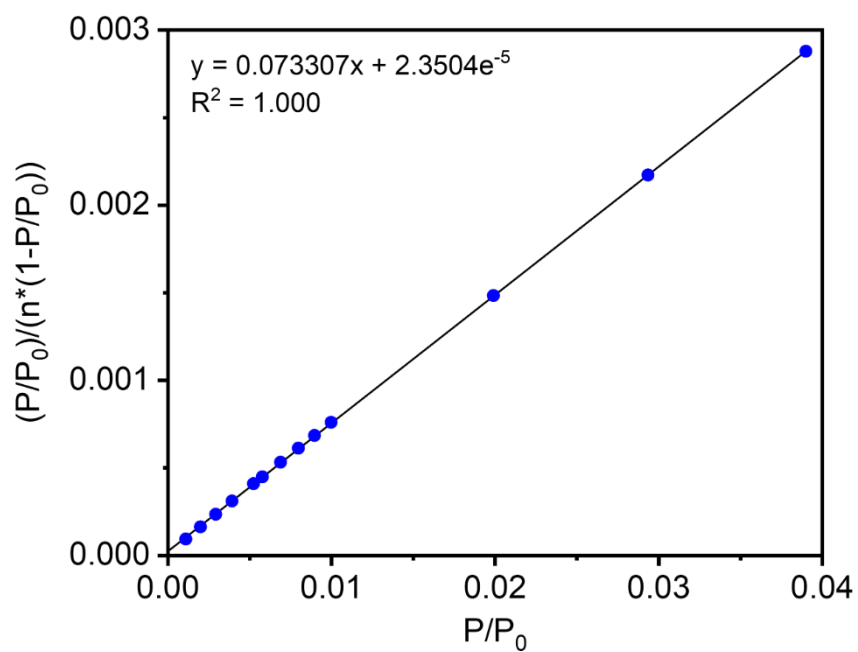

**Figure S100.** Linearized BET plot for the  $\text{N}_2$  adsorption data of  $\text{Mg}_2(m\text{-dobdc})$  synthesized at 0.5 M.

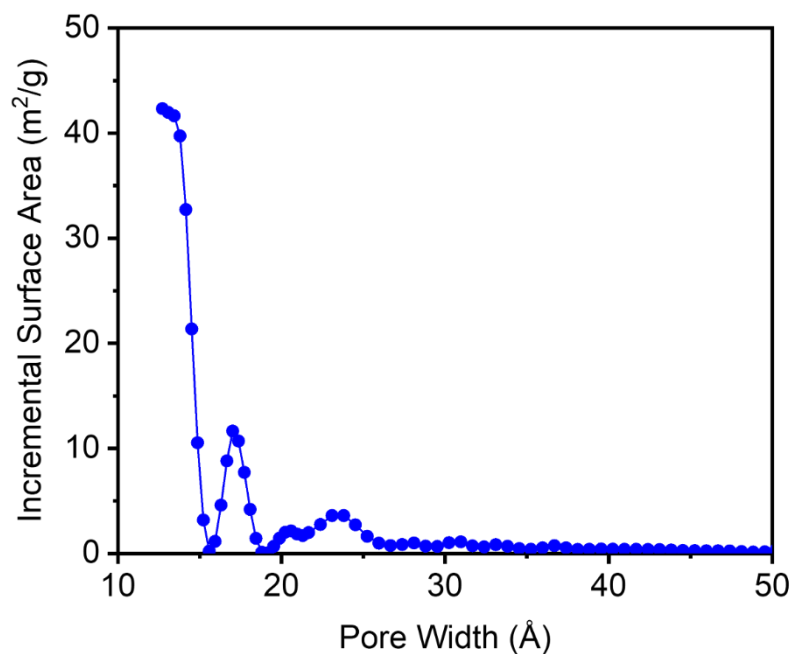

**Figure S101.** DFT-calculated pore size distribution for  $\text{Mg}_2(m\text{-dobdc})$  synthesized at 0.5 M, assuming a cylindrical pore geometry. The primary pore size is below the lower limit of the measurement.

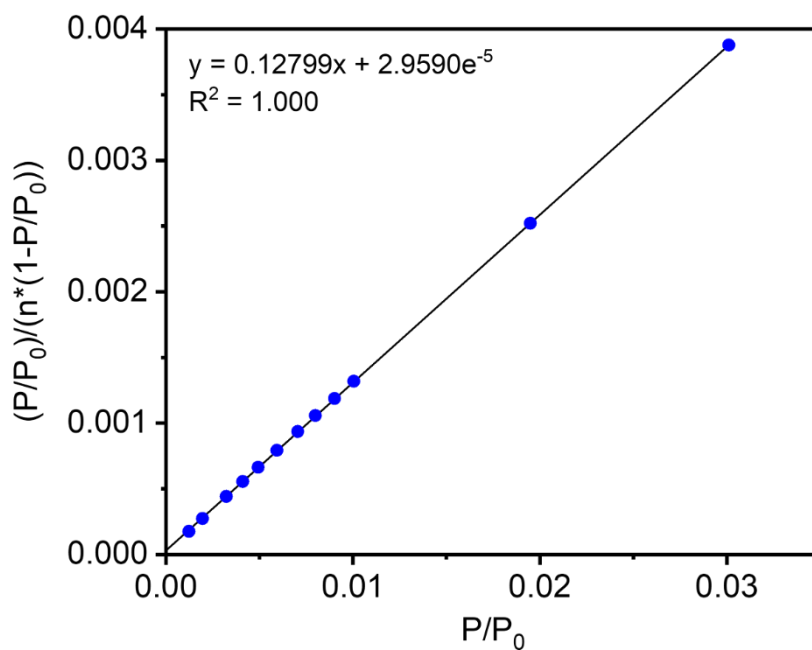

**Figure S102.** Linearized BET plot for the  $\text{N}_2$  adsorption data of  $\text{Mg}_2(m\text{-dobdc})$  synthesized at 0.1 M.

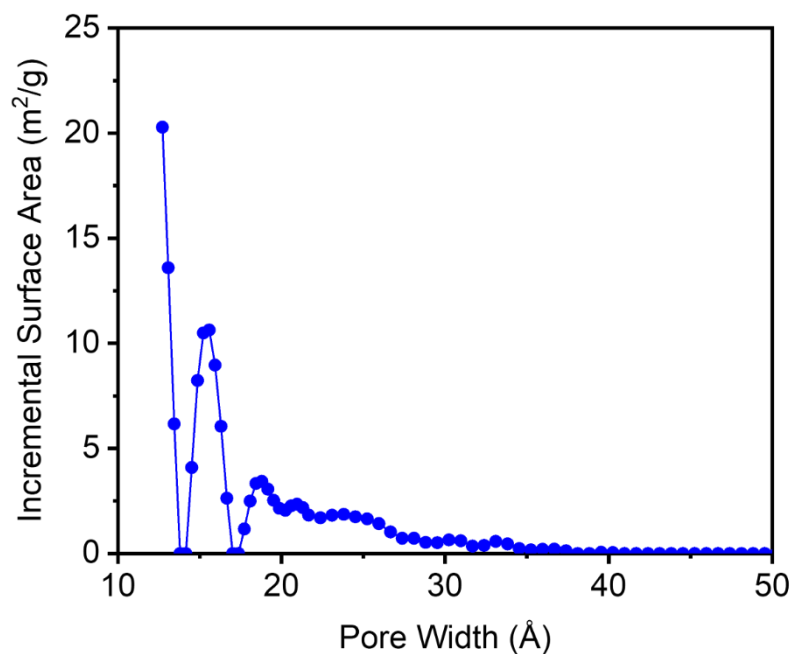

**Figure S103.** DFT-calculated pore size distribution for  $\text{Mg}_2(m\text{-dobdc})$  synthesized at 0.1 M, assuming a cylindrical pore geometry. The primary pore size is below the lower limit of the measurement.

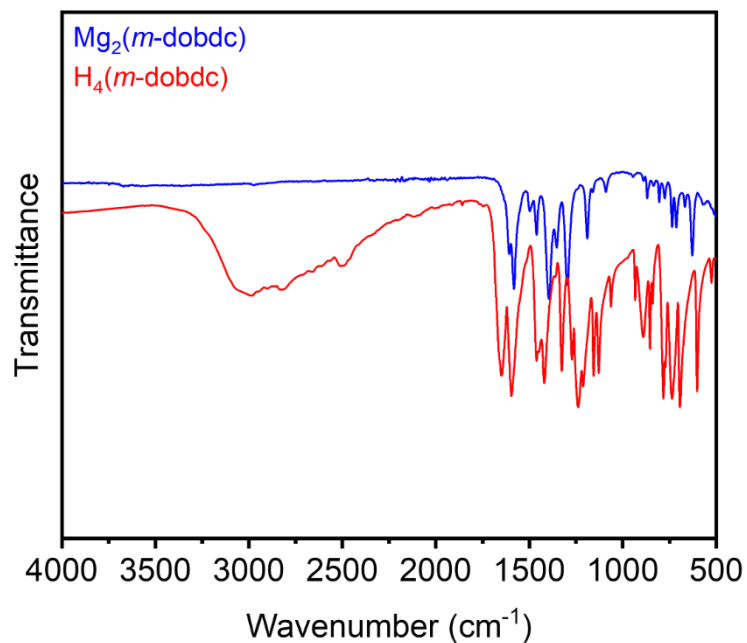

**Figure S104.** ATR-IR spectra of  $\text{Mg}_2(m\text{-dobdc})$  synthesized at 0.5 M and the  $\text{H}_4(m\text{-dobdc})$  linker.

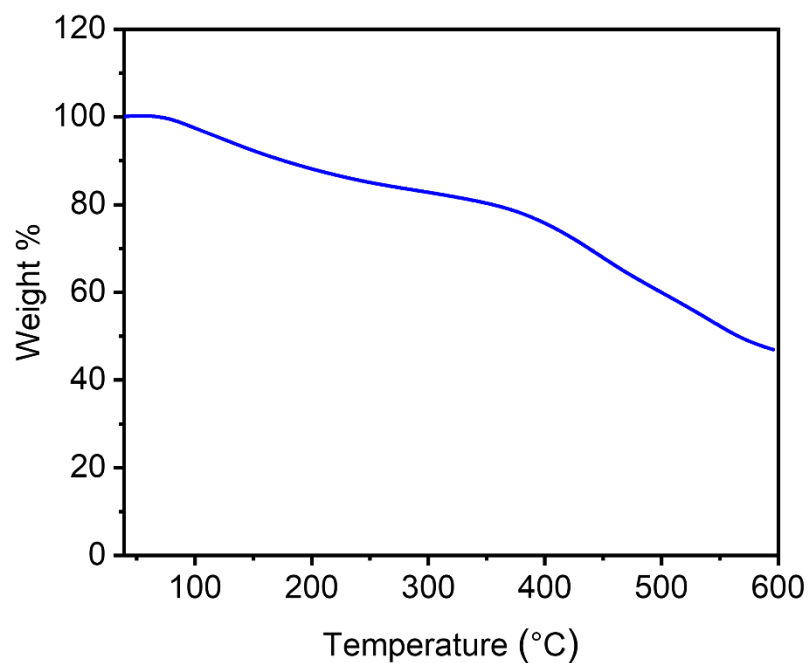

**Figure S105.** Thermogravimetric decomposition profile under N<sub>2</sub> of Mg<sub>2</sub>(*m*-dobdc) synthesized at 0.5 M.

**Table S10.** Surface area data and yields for Mg<sub>2</sub>(*m*-dobdc) at each synthesized concentration. Literature values for surface areas are included.

| Concentration (M) | BET Surface Area (m <sup>2</sup> /g) | Langmuir Surface Area (m <sup>2</sup> /g) | Yield (%) |
|-------------------|--------------------------------------|-------------------------------------------|-----------|
| 0.1               | 762 ± 1                              | 865                                       | 26.8      |
| 0.5               | 1330 ± 2                             | 1767                                      | 43.7      |
| 1.0               | 1060 ± 1                             | 1383                                      | 69.2      |
| Literature        | 1556 <sup>15</sup>                   | 1971 <sup>15</sup>                        | -         |

## 5.2. Co<sub>2</sub>(*m*-dobdc).

Prepared according to a modified literature procedure.<sup>8</sup> In a 20 mL scintillation vial, Co(NO<sub>3</sub>)<sub>2</sub>•6H<sub>2</sub>O (364 mg, 1.25 mmol, 2.50 equiv.) was dissolved in H<sub>2</sub>O (2.5 mL, 0.5 mL, or 0.25 mL for 0.1 M, 0.5 M, and 1.0 M, respectively). In a separate 20 mL scintillation vial equipped with a stir bar, NaOH (80.0 mg, 2.00 mmol, 4.00 equiv.), H<sub>4</sub>*m*-dobdc (99.0 mg, 0.50 mmol, 1.00 equiv.), and H<sub>2</sub>O (2.5 mL, 0.5 mL, or 0.25 mL for 0.1 M, 0.5 M, and 1.0 M, respectively) were combined. The Co(NO<sub>3</sub>)<sub>2</sub>•H<sub>2</sub>O solution was added all at once to the H<sub>4</sub>*m*-dobdc solution via a plastic pipette. The mixture was stirred at room temperature for 1 h. The reaction mixture was vacuum-filtered, and the resulting solid was rinsed with MeOH (10–15 mL). The resulting pink solid was transferred to a new scintillation vial filled with MeOH (10–15 mL). The vial was transferred to an aluminum block on a hot plate that had been pre-heated to 60 °C and was allowed to stand at this temperature for at least 12 h. At this time, the heterogenous mixture was allowed to cool to room temperature, the solvent was decanted, and fresh MeOH (10–15 mL) was added. This process was repeated for a total of six MeOH soaks. After the final soak, the solvent was decanted, and the remaining solid was allowed to dry in air. The sample was then activated using supercritical CO<sub>2</sub> (See Section 1), yielding activated Co<sub>2</sub>(*m*-dobdc) (56.8%, 57.3%, and 38.5% yield for 0.1 M, 0.5 M, and 1.0 M, respectively) that was immediately transferred to a glass adsorption tube equipped with a Micromeritics *CheckSeal*. The sample was activated on the SmartVac under high vacuum (<10 μbar), ramping the temperature slowly to 180 °C (0.1 °C/min). The sample was allowed to stand at 180 °C under high vacuum (<10 μbar) for 12 h prior to gas adsorption analysis.

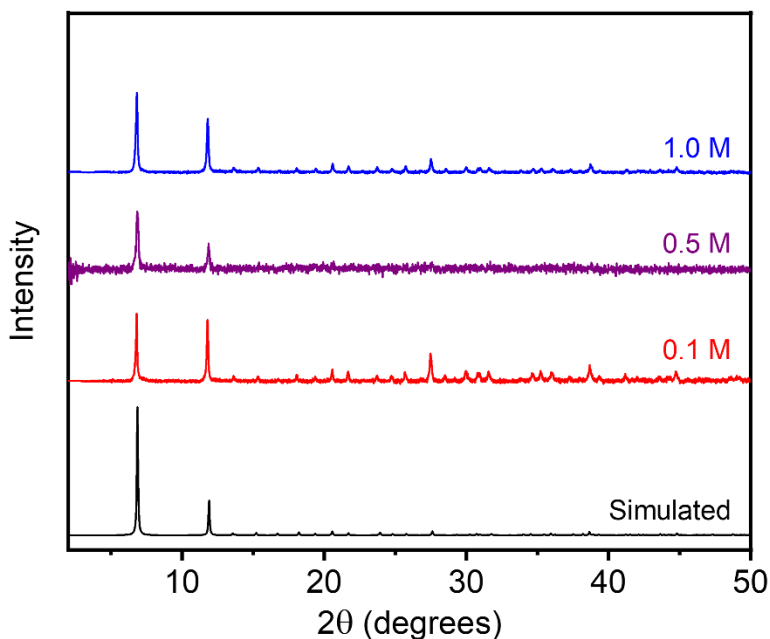

**Figure S106.** Baseline-corrected PXRD patterns ( $\lambda = 1.5406 \text{ \AA}$ ) of MeOH-solvated Co<sub>2</sub>(*m*-dobdc) at different concentrations after aqueous synthesis. The simulated pattern based on the previously reported SCXRD structure of Co<sub>2</sub>(*m*-dobdc) is included for reference.<sup>14</sup>

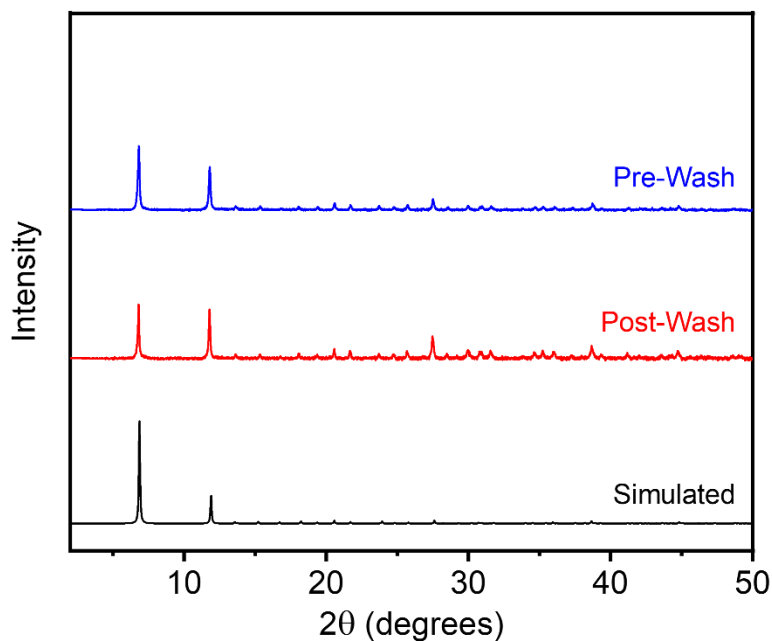

**Figure S107.** Baseline-corrected PXRD patterns ( $\lambda = 1.5406 \text{ \AA}$ ) of  $\text{Co}_2(m\text{-dobdc})$  synthesized at 0.1 M before (pre-wash) and after (post-wash) soaking in MeOH. The simulated pattern based on the previously reported SCXRD structure of  $\text{Co}_2(m\text{-dobdc})$  is included for reference.<sup>14</sup> No significant change in the pattern was observed upon soaking the MOF in MeOH.

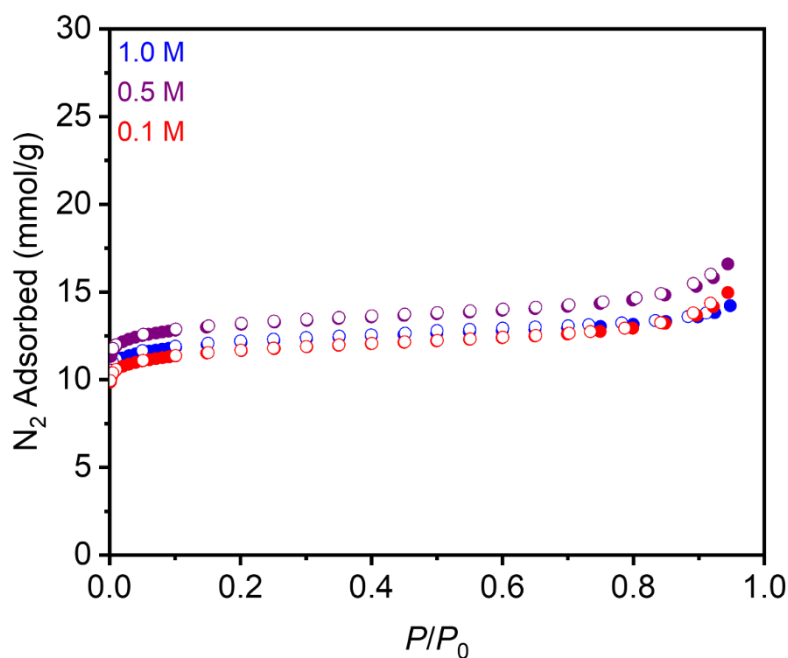

**Figure S108.** 77 K N<sub>2</sub> adsorption (filled circles) and desorption (open circles) isotherms of activated Co<sub>2</sub>(*m*-dobdc) at different concentrations after aqueous synthesis. BET surface areas determined from these data are  $1034 \pm 1 \text{ m}^2/\text{g}$  (0.1 M),  $1169 \pm 1 \text{ m}^2/\text{g}$  (0.5 M), and  $1081 \pm 1 \text{ m}^2/\text{g}$  (1.0 M). The Langmuir surface areas determined from these data are  $1314 \text{ m}^2/\text{g}$  (0.1 M),  $1472 \text{ m}^2/\text{g}$  (0.5 M), and  $1313 \text{ m}^2/\text{g}$  (1.0 M).

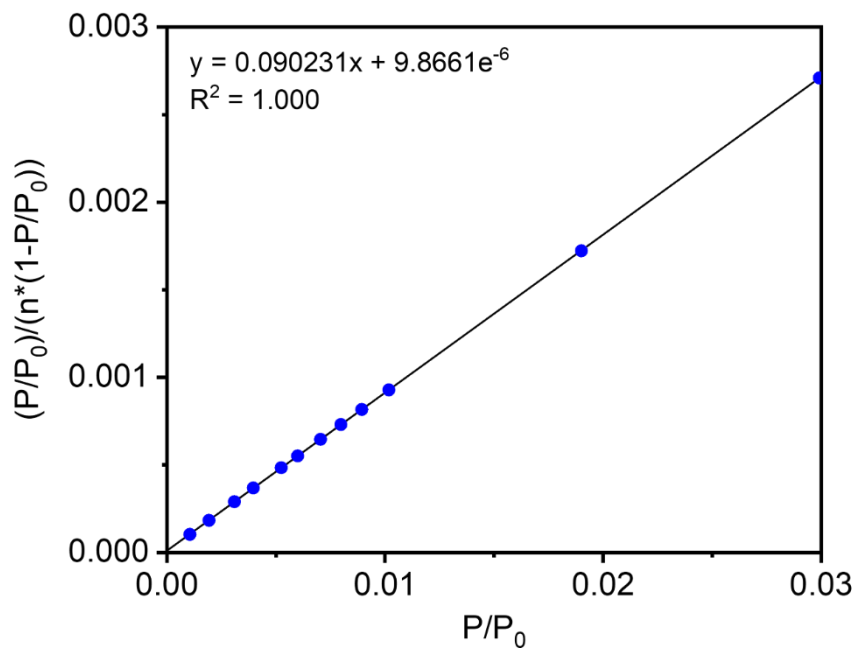

**Figure S109.** Linearized BET plot for the N<sub>2</sub> adsorption data of Co<sub>2</sub>(*m*-dobdc) synthesized at 1.0 M.



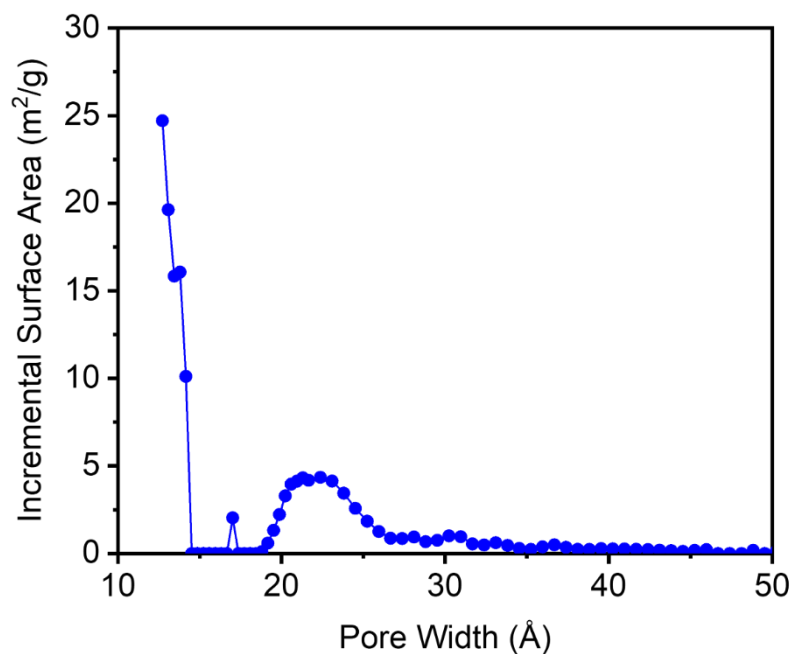

**Figure S110.** DFT-calculated pore size distribution for  $\text{Co}_2(m\text{-dobdc})$  synthesized at 1.0 M, assuming a cylindrical pore geometry. The primary pore size is below the lower limit of the measurement.

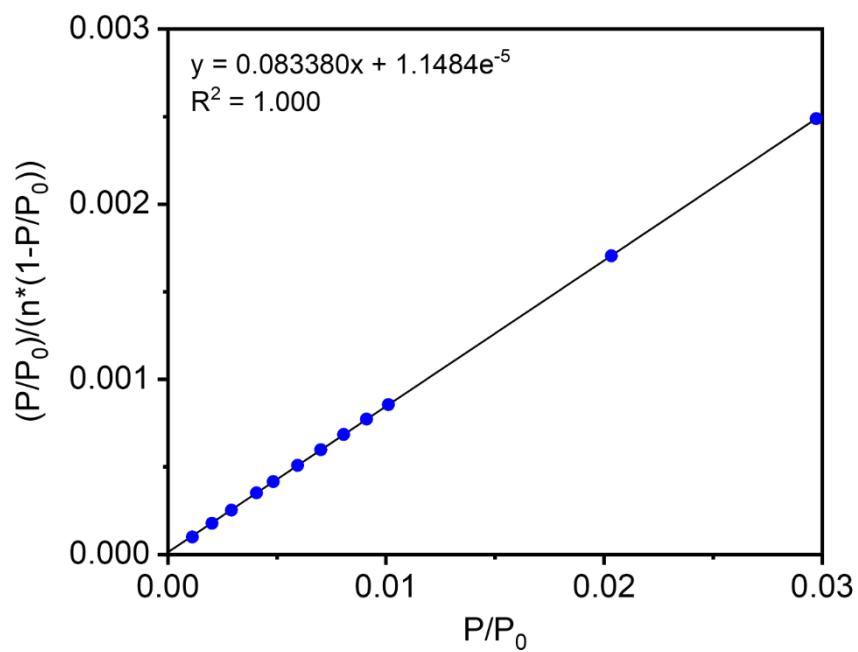

**Figure S111.** Linearized BET plot for the  $\text{N}_2$  adsorption data of  $\text{Co}_2(m\text{-dobdc})$  synthesized at 0.5 M.

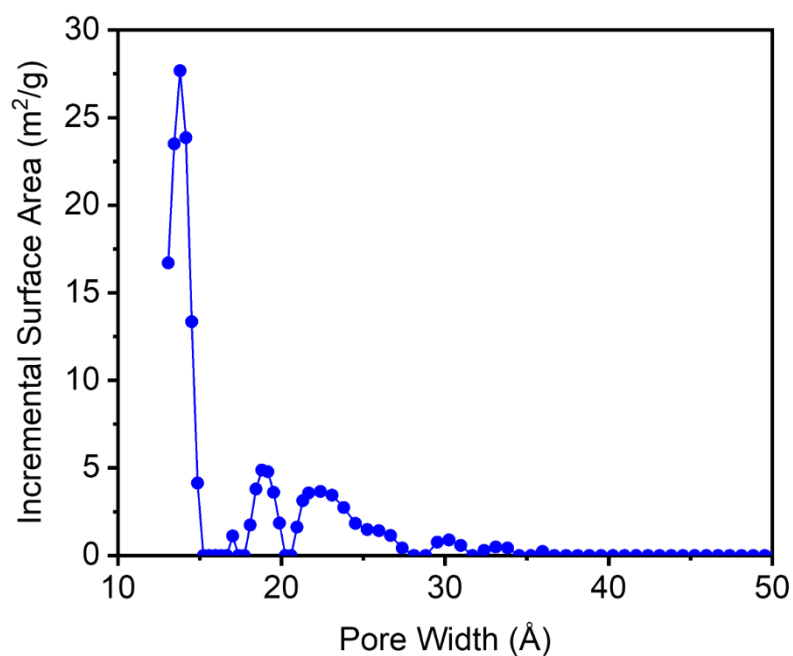

**Figure S112.** DFT-calculated pore size distribution for  $\text{Co}_2(m\text{-dobdc})$  synthesized at 0.5 M, assuming a cylindrical pore geometry.

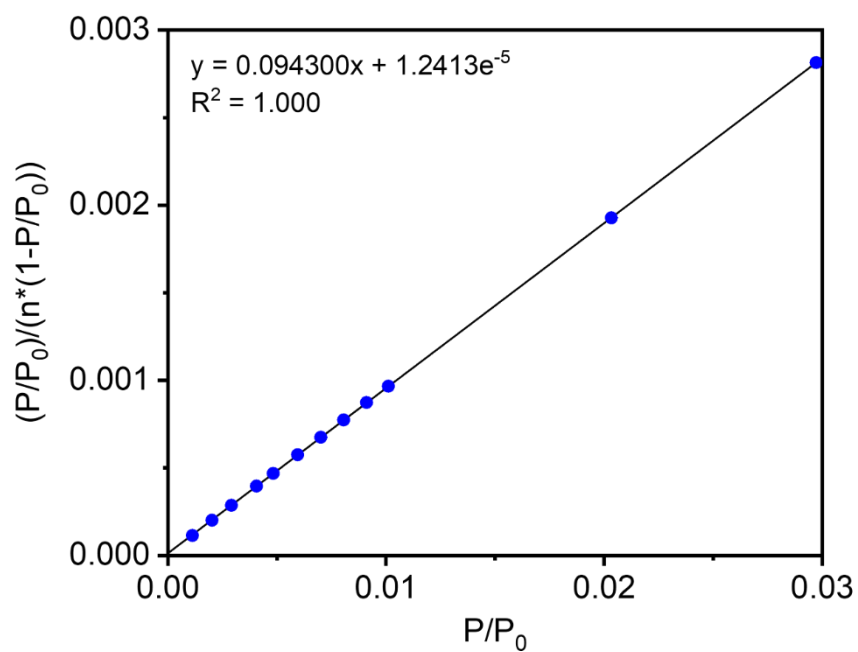

**Figure S113.** Linearized BET plot for the  $\text{N}_2$  adsorption data of  $\text{Co}_2(m\text{-dobdc})$  synthesized at 0.1 M.

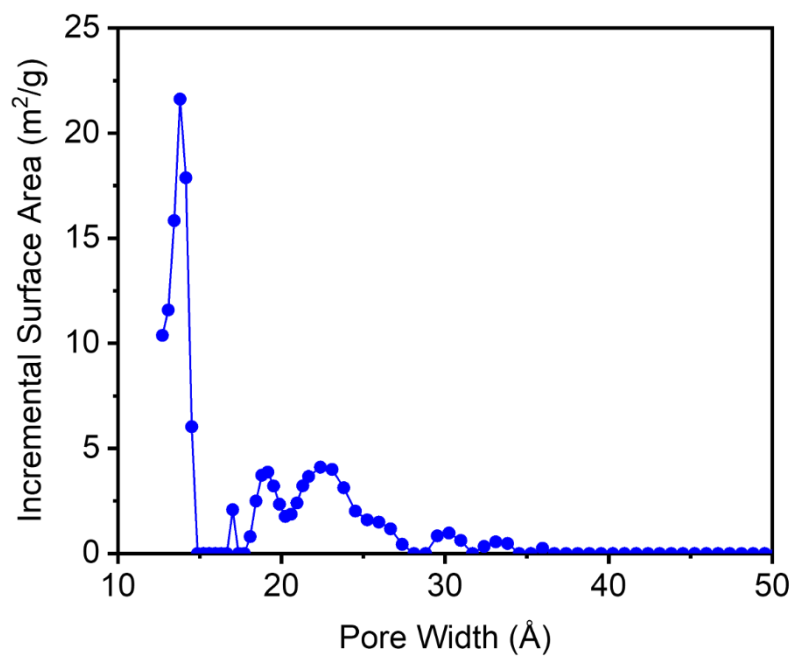

**Figure S114.** DFT-calculated pore size distribution for  $\text{Mg}_2(m\text{-dobdc})$  synthesized at 0.1 M, assuming a cylindrical pore geometry.

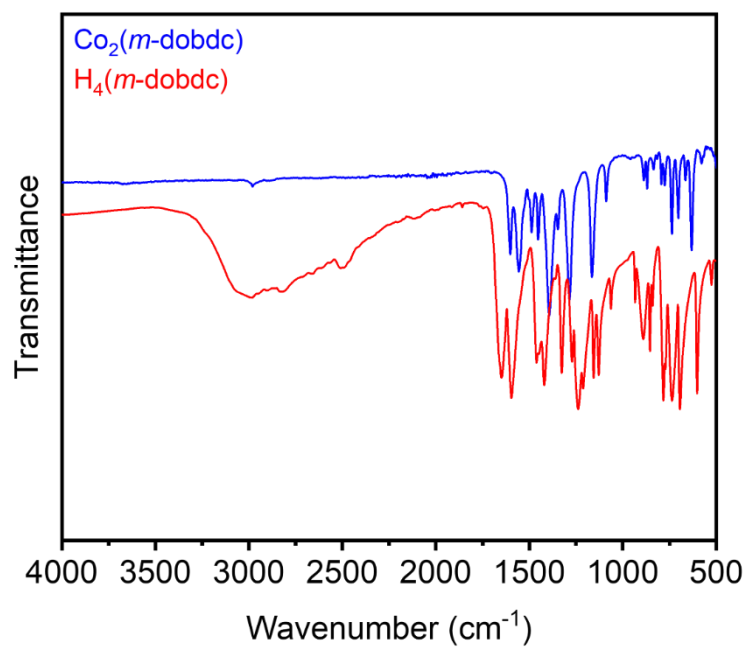

**Figure S115.** ATR-IR spectra of  $\text{Co}_2(m\text{-dobdc})$  synthesized at 0.5 M and the  $\text{H}_4(m\text{-dobdc})$  linker.

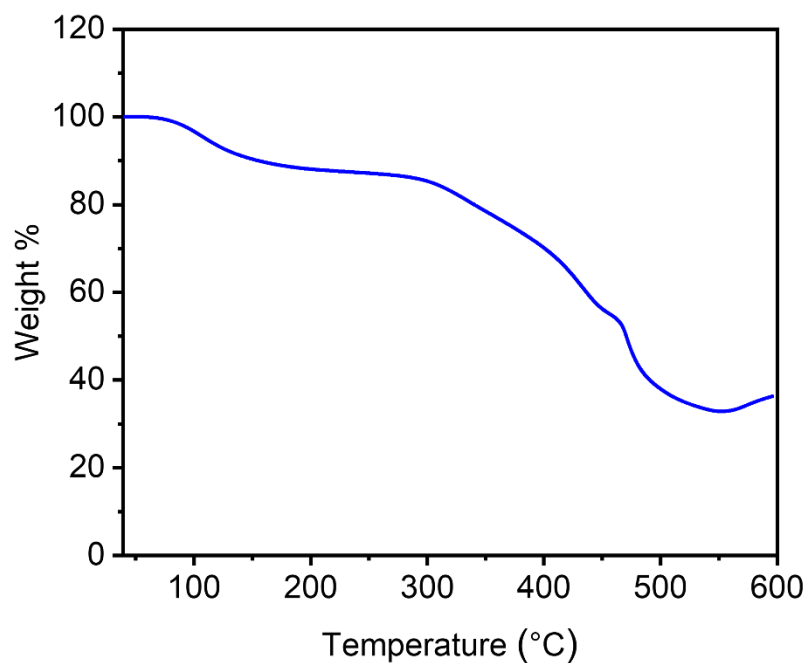

**Figure S116.** Thermogravimetric decomposition profile under N<sub>2</sub> of Co<sub>2</sub>(*m*-dobdc) synthesized at 0.5 M.

**Table S11.** Surface area data and yields for Co<sub>2</sub>(*m*-dobdc) at each synthesized concentration. Literature values for surface areas are included.

| Concentration (M) | BET Surface Area<br>(m <sup>2</sup> /g) | Langmuir Surface Area<br>(m <sup>2</sup> /g) | Yield (%) |
|-------------------|-----------------------------------------|----------------------------------------------|-----------|
| 0.1               | 1034 ± 1                                | 1314                                         | 56.8      |
| 0.5               | 1169 ± 1                                | 1472                                         | 57.3      |
| 1.0               | 1081 ± 1                                | 1313                                         | 38.5      |
| Literature        | 1264 <sup>16</sup>                      | 1504 <sup>16</sup>                           | -         |

### 5.3. Ni<sub>2</sub>(*m*-dobdc).

Prepared according to a modified literature procedure.<sup>8</sup> In a 20 mL scintillation vial, Ni(NO<sub>3</sub>)<sub>2</sub>•6H<sub>2</sub>O (364 mg, 1.25 mmol, 2.50 equiv.) was dissolved in H<sub>2</sub>O (2.5 mL, 0.5 mL, or 0.25 mL for 0.1 M, 0.5 M, and 1.0 M, respectively). In a separate 20 mL scintillation vial equipped with a stir bar, NaOH (80.0 mg, 2.00 mmol, 4.00 equiv.), H<sub>4</sub>*m*-dobdc (99.0 mg, 0.50 mmol, 1.00 equiv.), and H<sub>2</sub>O (2.5 mL, 0.5 mL, or 0.25 mL for 0.1 M, 0.5 M, and 1.0 M, respectively) were combined. The Ni(NO<sub>3</sub>)<sub>2</sub>•H<sub>2</sub>O solution was added all at once to the H<sub>4</sub>*m*-dobdc solution via a plastic pipette. The mixture was stirred at room temperature for 1 h. The reaction mixture was vacuum-filtered, and the resulting solid was rinsed with MeOH (10–15 mL). The resulting green solid was transferred to a new scintillation vial filled with MeOH (10–15 mL). The vial was transferred to an aluminum block on a hot plate that had been pre-heated to 60 °C and was allowed to stand at this temperature for at least 12 h. At this time, the heterogenous mixture was allowed to cool to room temperature, the solvent was decanted, and fresh MeOH (10–15 mL) was added. This process was repeated for a total of six MeOH soaks. After the final soak, the solvent was decanted, and the remaining solid was allowed to dry in air. The sample was then activated using supercritical CO<sub>2</sub> (See Section 1), yielding activated Ni<sub>2</sub>(*m*-dobdc) (83.3%, 47.7%, and 55.2% yield for 0.1 M, 0.5 M, and 1.0 M, respectively) that was immediately transferred to a glass adsorption tube equipped with a Micromeritics *CheckSeal*. The sample was activated on the SmartVac under high vacuum (<10 µbar), ramping the temperature slowly to 180 °C (0.1°C/min). The sample was allowed to stand at 180 °C under high vacuum (<10 µbar) for 12 h prior to gas adsorption analysis.

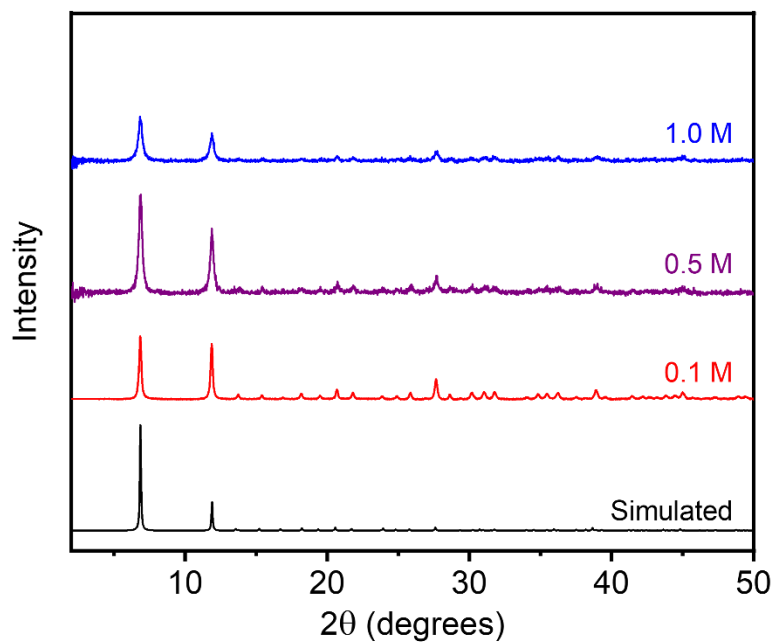

**Figure S117.** Baseline-corrected PXRD patterns ( $\lambda = 1.5406 \text{ \AA}$ ) of MeOH-solvated  $\text{Ni}_2(m\text{-dobdc})$  at different concentrations after aqueous synthesis. The simulated pattern based on the previously reported SCXRD structure of the isostructural framework  $\text{Co}_2(m\text{-dobdc})$  is included for reference.<sup>14</sup>

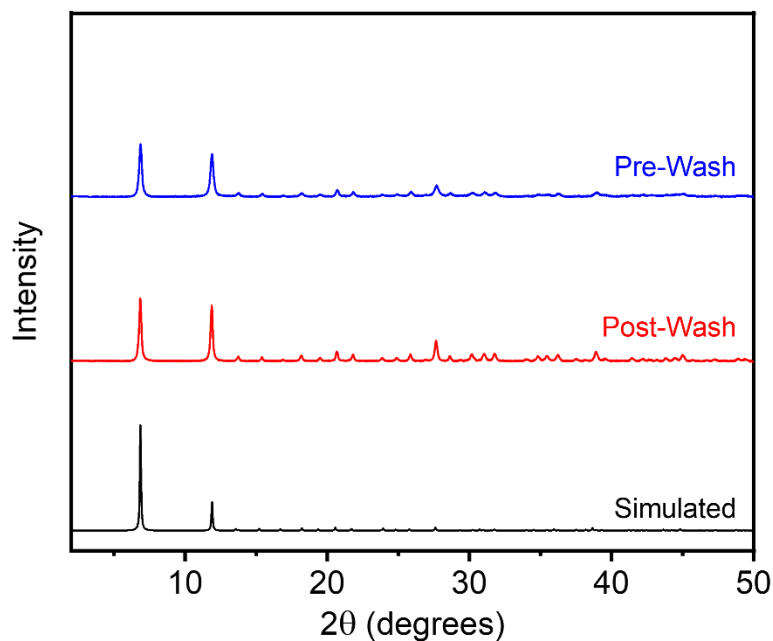

**Figure S118.** Baseline-corrected PXRD patterns ( $\lambda = 1.5406 \text{ \AA}$ ) of MeOH-solvated  $\text{Ni}_2(m\text{-dobdc})$  synthesized at 0.1 M before (pre-wash) and after (post-wash) soaking in MeOH. The simulated pattern based on the previously reported SCXRD structure of the isostructural framework  $\text{Co}_2(m\text{-dobdc})$  is included for reference.<sup>14</sup> No significant change in the pattern was observed upon soaking the MOF in MeOH.

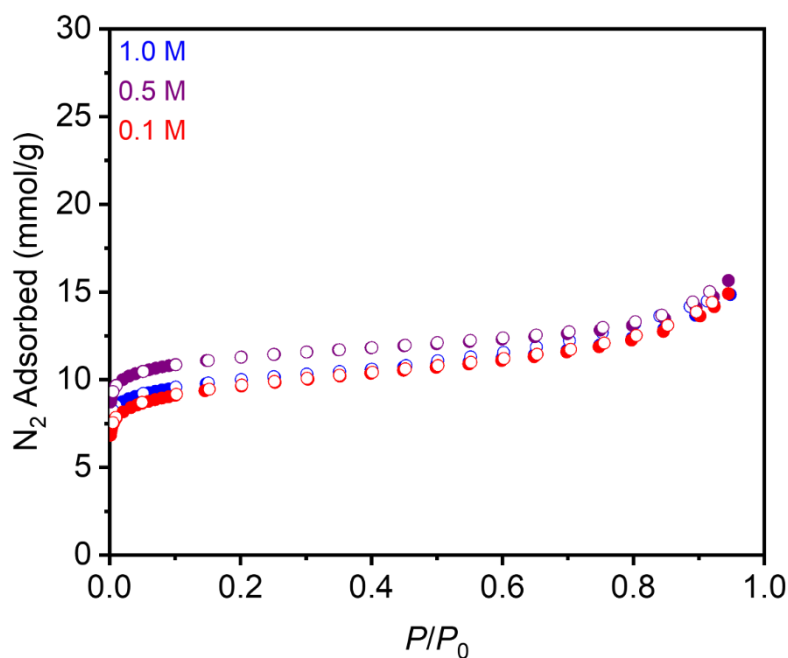

**Figure S119.** 77 K N<sub>2</sub> adsorption (filled circles) and desorption (open circles) isotherms of activated Ni<sub>2</sub>(*m*-dobdc) at different concentrations after aqueous synthesis. BET surface areas determined from these data are  $810 \pm 1 \text{ m}^2/\text{g}$  (0.1 M),  $977 \pm 1 \text{ m}^2/\text{g}$  (0.5 M), and  $854 \pm 1 \text{ m}^2/\text{g}$  (1.0 M). The Langmuir surface areas determined from these data are  $1265 \text{ m}^2/\text{g}$  (0.1 M),  $1342 \text{ m}^2/\text{g}$  (0.5 M), and  $1268 \text{ m}^2/\text{g}$  (1.0 M).

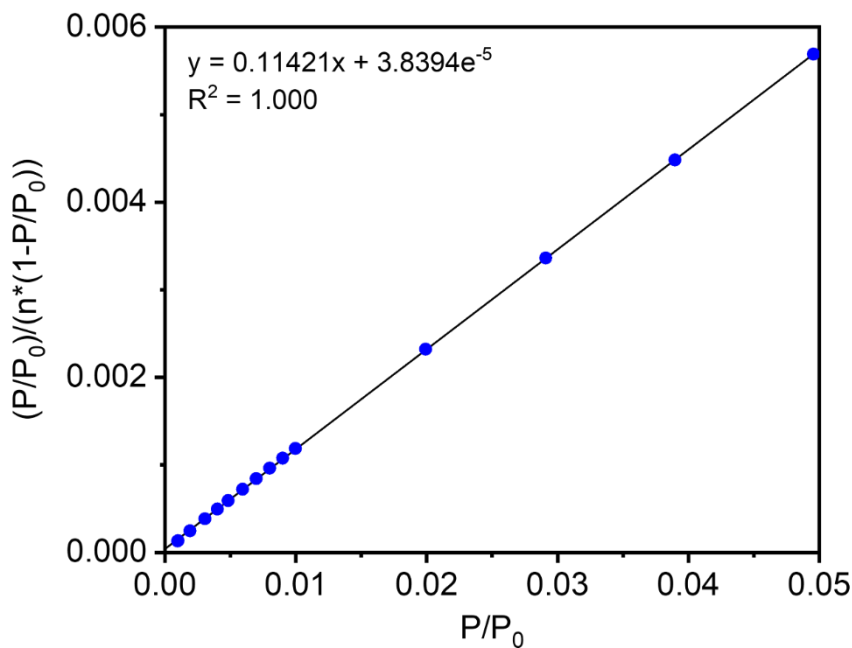

**Figure S120.** Linearized BET plot for the N<sub>2</sub> adsorption data of Ni<sub>2</sub>(*m*-dobdc) synthesized at 1.0 M.



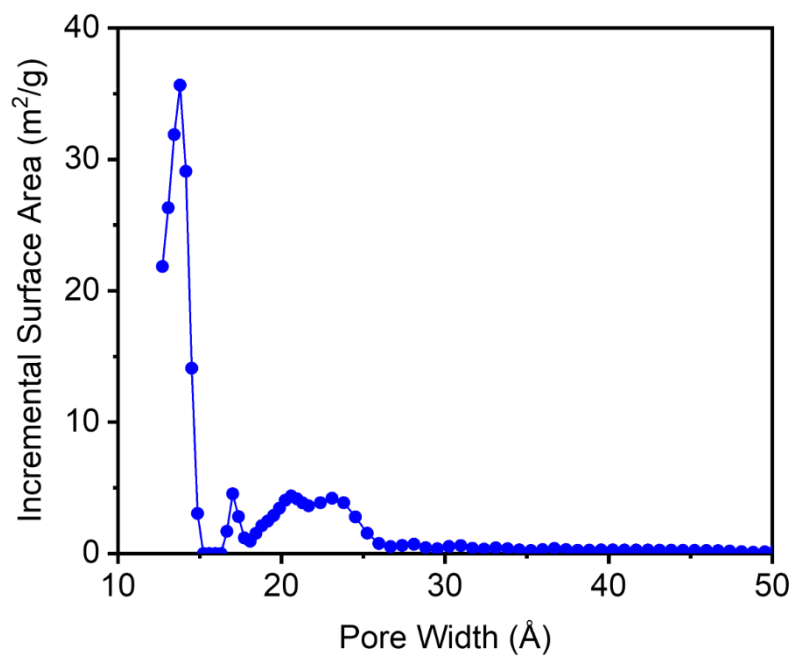

**Figure S121.** DFT-calculated pore size distribution for  $\text{Ni}_2(m\text{-dobdc})$  synthesized at 1.0 M, assuming a cylindrical pore geometry.

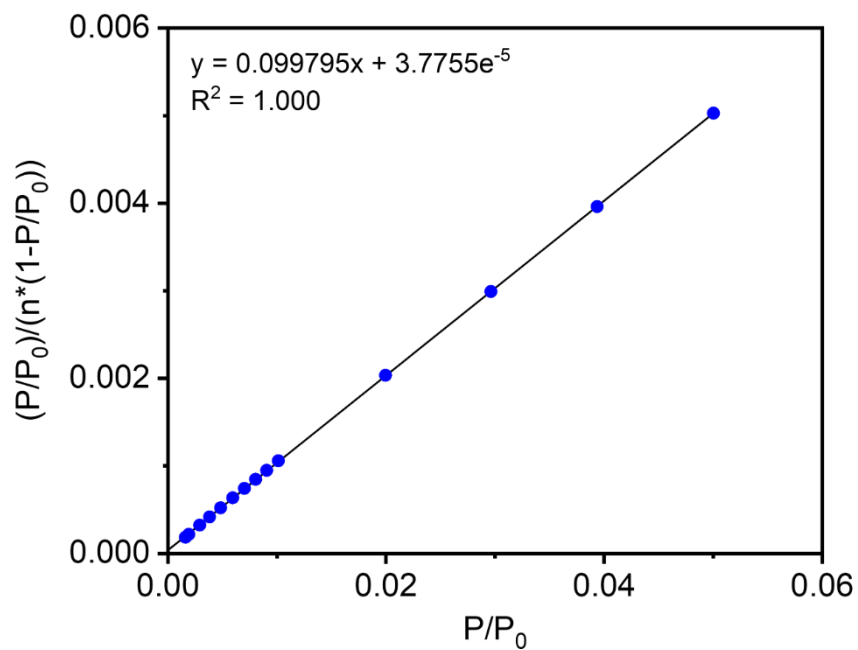

**Figure S122.** Linearized BET plot for the  $\text{N}_2$  adsorption data of  $\text{Ni}_2(m\text{-dobdc})$  synthesized at 0.5 M.

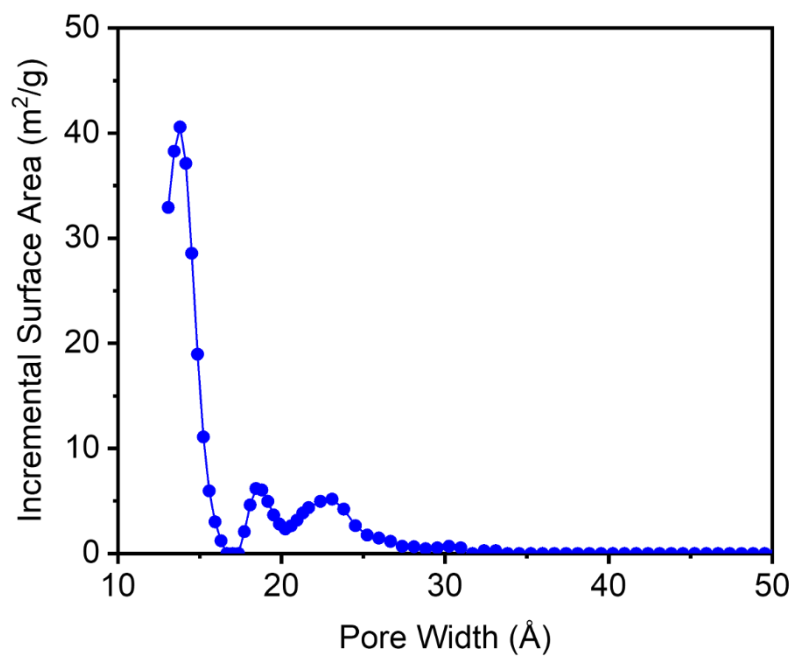

**Figure S123.** DFT-calculated pore size distribution for  $\text{Ni}_2(m\text{-dobdc})$  synthesized at 0.5 M, assuming a cylindrical pore geometry.

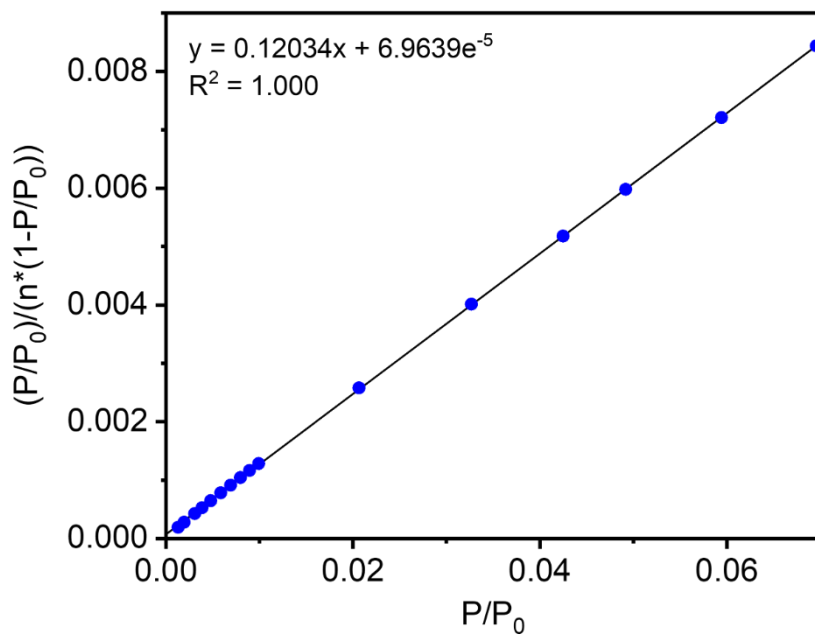

**Figure S124.** Linearized BET plot for the  $\text{N}_2$  adsorption data of  $\text{Ni}_2(m\text{-dobdc})$  synthesized at 0.1 M.

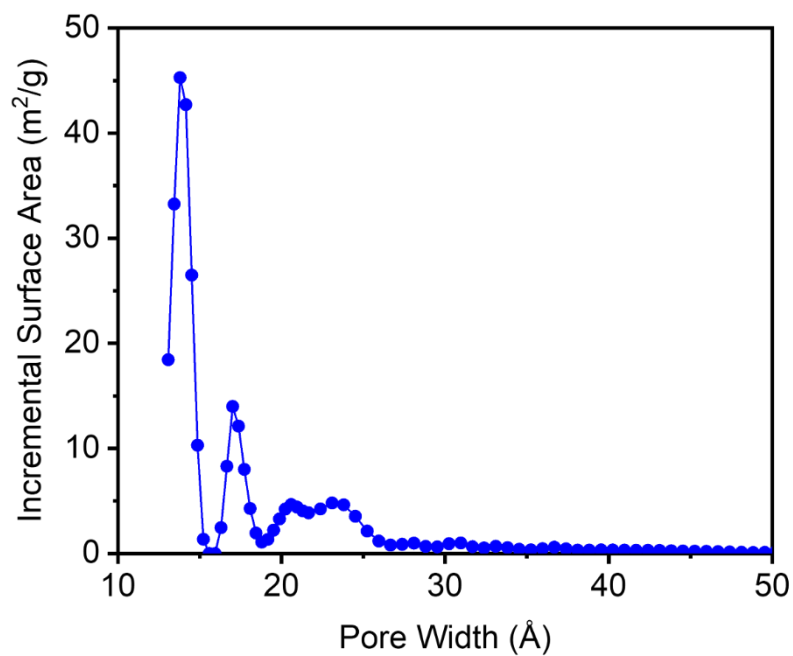

**Figure S125.** DFT-calculated pore size distribution for  $\text{Ni}_2(m\text{-dobdc})$  synthesized at 0.1 M, assuming a cylindrical pore geometry.

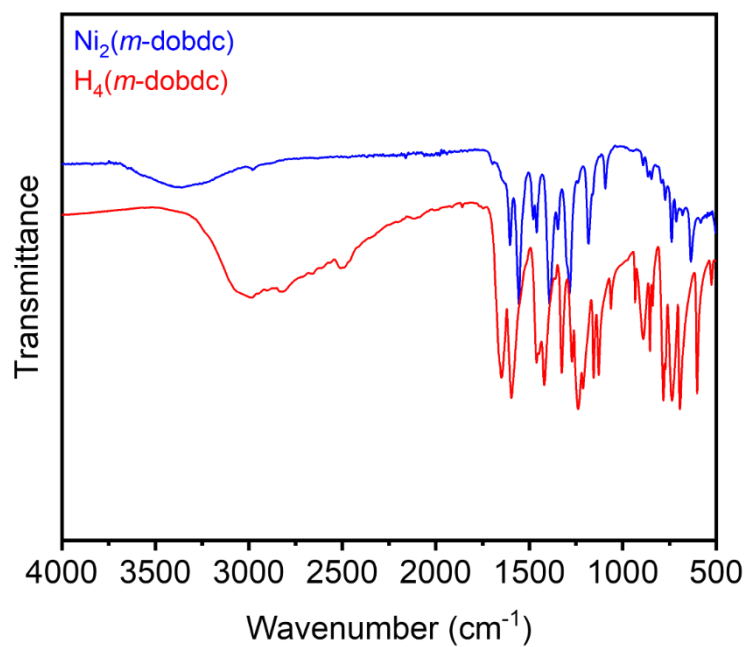

**Figure S126.** ATR-IR spectra of  $\text{Ni}_2(m\text{-dobdc})$  synthesized at 0.5 M and the  $\text{H}_4(m\text{-dobdc})$  linker.

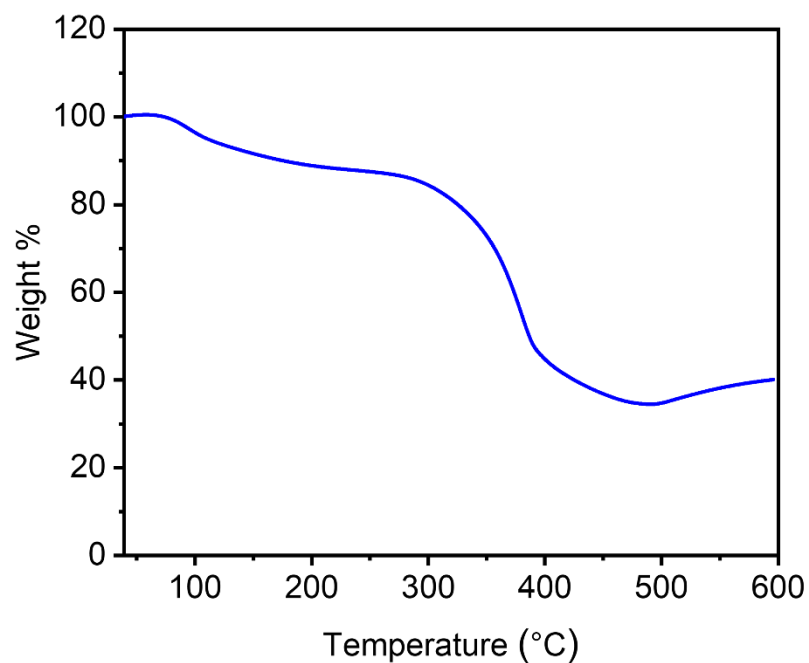

**Figure S127.** Thermogravimetric decomposition profile under N<sub>2</sub> of Ni<sub>2</sub>(*m*-dobdc) synthesized at 0.5 M.

**Table S12.** Surface area data and yields for Ni<sub>2</sub>(*m*-dobdc) at each synthesized concentration. Literature values for surface areas are included.

| Concentration (M) | BET Surface Area<br>(m <sup>2</sup> /g) | Langmuir Surface Area<br>(m <sup>2</sup> /g) | Yield (%) |
|-------------------|-----------------------------------------|----------------------------------------------|-----------|
| 0.1               | 810 ± 1                                 | 1265                                         | 83.3      |
| 0.5               | 977 ± 1                                 | 1342                                         | 47.7      |
| 1.0               | 854 ± 1                                 | 1268                                         | 55.2      |
| Literature        | 1321 <sup>16</sup>                      | 1592 <sup>16</sup>                           | -         |

#### 5.4. $\text{Zn}_2(m\text{-dobdc})$ .

Prepared according to a modified literature procedure.<sup>8</sup> In a 20 mL scintillation vial,  $\text{Zn}(\text{NO}_3)_2 \cdot 6\text{H}_2\text{O}$  (372 mg, 1.25 mmol, 2.50 equiv.) was dissolved in  $\text{H}_2\text{O}$  (2.5 mL). In a separate 20 mL scintillation vial equipped with a stir bar, NaOH (80.0 mg, 2.00 mmol, 4.00 equiv.),  $\text{H}_4m\text{-dobdc}$  (99.0 mg, 0.50 mmol, 1.00 equiv.), and  $\text{H}_2\text{O}$  (2.5 mL) were combined. The  $\text{Zn}(\text{NO}_3)_2 \cdot \text{H}_2\text{O}$  solution was added all at once to the  $\text{H}_4m\text{-dobdc}$  solution via a plastic pipette. The mixture was stirred at room temperature for 1 h. The reaction mixture was vacuum-filtered, and the resulting solid was rinsed with MeOH (10–15 mL). The resulting beige solid was transferred to a new scintillation vial filled with MeOH (10–15 mL). The vial was transferred to an aluminum block on a hot plate that had been pre-heated to 60 °C and was allowed to stand at this temperature for at least 12 h. At this time, the heterogenous mixture was allowed to cool to room temperature, the solvent was decanted, and fresh MeOH (10–15 mL) was added. This process was repeated for a total of six MeOH soaks. After the final soak, the solvent was decanted, and the remaining solid was allowed to dry in air. The sample was then activated using supercritical  $\text{CO}_2$  (See Section 1), yielding activated  $\text{Zn}_2(m\text{-dobdc})$  (79.6% yield) that was immediately transferred to a glass adsorption tube equipped with a Micromeritics *CheckSeal*. The sample was activated on the SmartVac under high vacuum (<10  $\mu\text{bar}$ ), ramping the temperature slowly to 180 °C (0.1 °C/min). The sample was allowed to stand at 180 °C under high vacuum (<10  $\mu\text{bar}$ ) for 12 h prior to gas adsorption analysis.

#### Attempted solvothermal syntheses.

**Condition A:** Attempted following a modified literature procedure for the synthesis of  $\text{M}_2(m\text{-dobdc})$  materials.<sup>16</sup> In a 20 mL scintillation vial equipped with a stir bar,  $\text{Zn}(\text{NO}_3)_2 \cdot 6\text{H}_2\text{O}$  (134 mg, 0.45 mmol, 2.50 equiv.),  $\text{H}_4m\text{-dobdc}$  (35.6 mg, 0.18 mmol, 1.00 equiv.), DMF (0.78 mL), and MeOH (0.42 mL) (0.15 M 13:7 DMF:MeOH reaction mixture). The vial was sealed and transferred to an aluminum block that was heated to 120 °C. The reaction mixture was allowed to stir gently for 24 h at this temperature. The mixture was then allowed to cool to room temperature, filtered via vacuum filtration, and washed with DMF (10 mL). The collected solid was transferred to a new 20 mL scintillation vial filled with DMF (10–15 mL). The vial was transferred to an aluminum block on a hot plate that had been pre-heated to 120 °C and was allowed to stand at this temperature for at least 12 h. At this time, the heterogenous mixture was allowed to cool to room temperature, the solvent was decanted, and fresh DMF (10–15 mL) was added. This process was repeated for a total of three DMF soaks. After the final soak, the mixture was filtered via vacuum filtration and washed with MeOH (10 mL). The resulting solid was transferred to a new scintillation vial filled with MeOH (10–15 mL). The vial was transferred to an aluminum block on a hot plate that had been pre-heated to 60 °C and was allowed to stand at this temperature for at least 12 h. At this time, the heterogenous mixture was allowed to cool to room temperature, the solvent was decanted, and fresh MeOH (10–15 mL) was added. This process was repeated for a total of three MeOH

soaks. After the final soak, the solvent was decanted, and the remaining solid was allowed to dry in air. A PXRD measurement of the washed product was performed.

**Condition B:** Attempted following a modified literature procedure for the synthesis of  $M_2(m\text{-dobdc})$  materials.<sup>16</sup> In a 20 mL scintillation vial equipped with a stir bar,  $ZnCl_2$  (61.3 mg, 0.45 mmol, 2.50 equiv.),  $H_4m\text{-dobdc}$  (35.6 mg, 0.18 mmol, 1.00 equiv.), DMF (7.8 mL), and MeOH (4.2 mL) (0.015 M 13:7 DMF:MeOH reaction mixture). The vial was sealed and transferred to an aluminum block that was heated to 120 °C. The reaction mixture was allowed to stir gently for 24 h at this temperature. The mixture was then allowed to cool to room temperature, filtered via vacuum filtration, and washed with DMF (10 mL). The collected solid was transferred to a new 20 mL scintillation vial filled with DMF (10–15 mL). The vial was transferred to an aluminum block on a hot plate that had been pre-heated to 120 °C and was allowed to stand at this temperature for at least 12 h. At this time, the heterogenous mixture was allowed to cool to room temperature, the solvent was decanted, and fresh DMF (10–15 mL) was added. This process was repeated for a total of three DMF soaks. After the final soak, the mixture was filtered via vacuum filtration and washed with MeOH (10 mL). The resulting solid was transferred to a new scintillation vial filled with MeOH (10–15 mL). The vial was transferred to an aluminum block on a hot plate that had been pre-heated to 60 °C and was allowed to stand at this temperature for at least 12 h. At this time, the heterogenous mixture was allowed to cool to room temperature, the solvent was decanted, and fresh MeOH (10–15 mL) was added. This process was repeated for a total of three MeOH soaks. After the final soak, the solvent was decanted, and the remaining solid was allowed to dry in air. A PXRD measurement of the washed product was performed.

**Condition C:** Attempted following a modified literature procedure for the synthesis of  $M_2(m\text{-dobdc})$  materials.<sup>16</sup> In a 20 mL scintillation vial equipped with a stir bar,  $Zn(NO_3)_2 \cdot 6H_2O$  (134 mg, 0.45 mmol, 2.50 equiv.),  $H_4m\text{-dobdc}$  (35.6 mg, 0.18 mmol, 1.00 equiv.), DMF (7.8 mL), and MeOH (4.2 mL) (0.015 M 13:7 DMF:MeOH reaction mixture). The vial was sealed and transferred to an aluminum block that was heated to 120 °C. The reaction mixture was allowed to stir gently for 24 h at this temperature. The mixture was then allowed to cool to room temperature, filtered via vacuum filtration, and washed with DMF (10 mL). The collected solid was transferred to a new 20 mL scintillation vial filled with DMF (10–15 mL). The vial was transferred to an aluminum block on a hot plate that had been pre-heated to 120 °C and was allowed to stand at this temperature for at least 12 h. At this time, the heterogenous mixture was allowed to cool to room temperature, the solvent was decanted, and fresh DMF (10–15 mL) was added. This process was repeated for a total of three DMF soaks. After the final soak, the mixture was filtered via vacuum filtration and washed with MeOH (10 mL). The resulting solid was transferred to a new scintillation vial filled with MeOH (10–15 mL). The vial was transferred to an aluminum block on a hot plate that had been pre-heated to 60 °C and was allowed to stand at this temperature for at least 12 h. At this time, the heterogenous mixture was allowed to cool to room temperature, the solvent was decanted, and fresh MeOH (10–15 mL) was added. This process was repeated for a total of three MeOH

soaks. After the final soak, the solvent was decanted, and the remaining solid was allowed to dry in air. A PXRD measurement of the washed product was performed.

**Condition D:** Attempted following a modified literature procedure for the synthesis of  $M_2(m\text{-dobdc})$  materials.<sup>16</sup> In a 20 mL scintillation vial equipped with a stir bar,  $ZnCl_2$  (61.3 mg, 0.45 mmol, 2.50 equiv.),  $H_4m\text{-dobdc}$  (35.6 mg, 0.18 mmol, 1.00 equiv.), DMF (0.78 mL), and MeOH (0.42 mL) (0.15 M 13:7 DMF:MeOH reaction mixture). The vial was sealed and transferred to an aluminum block that was heated to 120 °C. The reaction mixture was allowed to stir gently for 24 h at this temperature. The mixture was then allowed to cool to room temperature, filtered via vacuum filtration, and washed with DMF (10 mL). No solid was formed.

**Condition E:** Attempted following a modified literature procedure for the synthesis of  $M_2(dobdc)$  materials.<sup>17</sup> In a 20 mL scintillation vial equipped with a stir bar,  $Zn(NO_3)_2 \cdot 6H_2O$  (74.4 mg, 0.25 mmol, 2.50 equiv.),  $H_4m\text{-dobdc}$  (19.8 mg, 0.1 mmol, 1.00 equiv.), DMF (9 mL), EtOH (0.5 mL), and  $H_2O$  (0.5 mL) (0.01 M 18:1:1 DMF:EtOH: $H_2O$  reaction mixture). The vial was sealed and transferred to an aluminum block that was heated to 120 °C. The reaction mixture was allowed to stir gently for 24 h at this temperature. The mixture was then allowed to cool to room temperature, filtered via vacuum filtration, and washed with DMF (10 mL). No solid was isolated.

**Condition F:** Attempted following a modified literature procedure for the synthesis of  $M_2(dobdc)$  materials.<sup>17</sup> In a 20 mL scintillation vial equipped with a stir bar,  $ZnCl_2$  (34.1 mg, 0.25 mmol, 2.50 equiv.),  $H_4m\text{-dobdc}$  (19.8 mg, 0.1 mmol, 1.00 equiv.), DMF (9 mL), EtOH (0.5 mL), and  $H_2O$  (0.5 mL) (0.01 M 18:1:1 DMF:EtOH: $H_2O$  reaction mixture). The vial was sealed and transferred to an aluminum block that was heated to 120 °C. The reaction mixture was allowed to stir gently for 24 h at this temperature. The mixture was then allowed to cool to room temperature, filtered via vacuum filtration, and washed with DMF (10 mL). No solid was isolated.

The PXRD patterns corresponding to the solids obtained under Conditions A–C are included in main text Figure 6A.

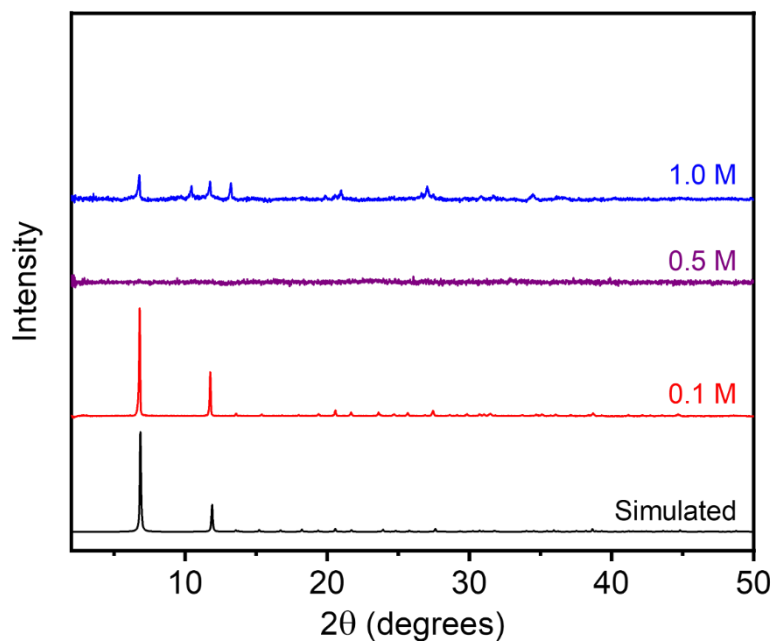

**Figure S128.** Baseline-corrected PXRD patterns ( $\lambda = 1.5406 \text{ \AA}$ ) of MeOH-solvated  $\text{Zn}_2(m\text{-dobdc})$  at different concentrations after aqueous synthesis. The simulated pattern based on the previously reported SCXRD structure of the isostructural framework  $\text{Co}_2(m\text{-dobdc})$  is included for reference.<sup>14</sup> The Phase-pure MOF only formed at a concentration of 0.1 M.



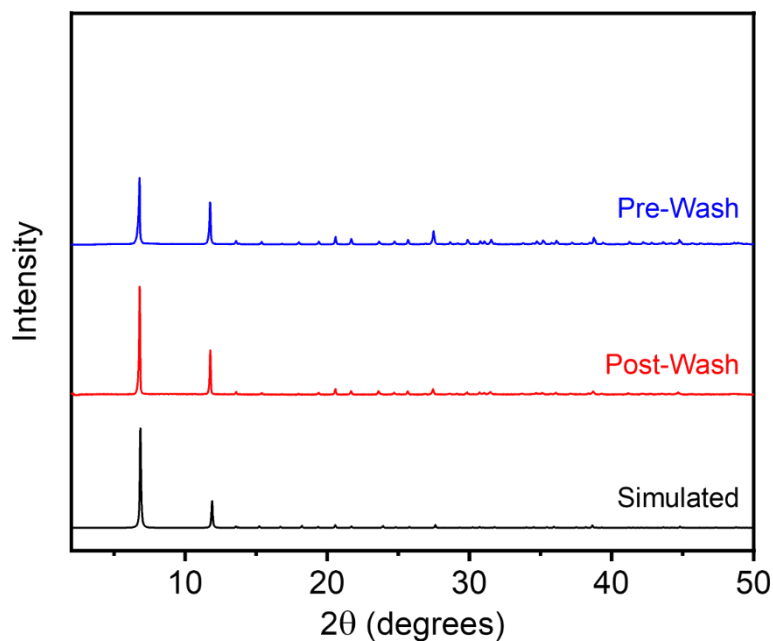

**Figure S129.** Baseline-corrected PXRD patterns ( $\lambda = 1.5406 \text{ \AA}$ ) of MeOH-solvated  $\text{Zn}_2(m\text{-dobdc})$  synthesized at 0.1 M before (pre-wash) and after (post-wash) soaking in MeOH. The simulated pattern based on the previously reported SCXRD structure of the isostructural framework  $\text{Co}_2(m\text{-dobdc})$  is included for reference.<sup>18</sup> No significant change in the pattern was observed upon soaking the MOF in MeOH.

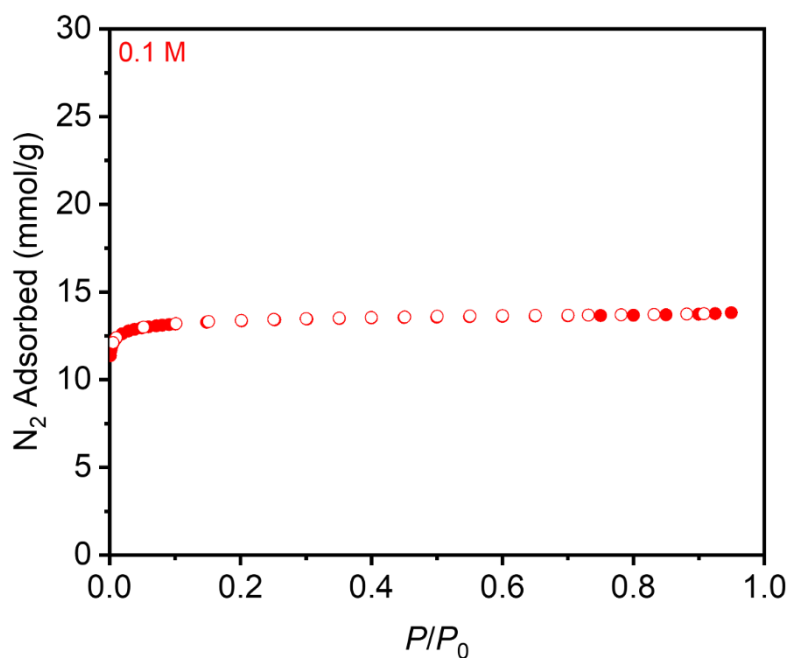

**Figure S130.** 77 K N<sub>2</sub> adsorption (filled circles) and desorption (open circles) isotherms of activated Zn<sub>2</sub>(*m*-dobdc) after aqueous synthesis. BET surface area determined from this data is 1216 ± 1 m<sup>2</sup>/g (0.1 M). The Langmuir surface area determined from this data is 1340 m<sup>2</sup>/g (0.1 M).

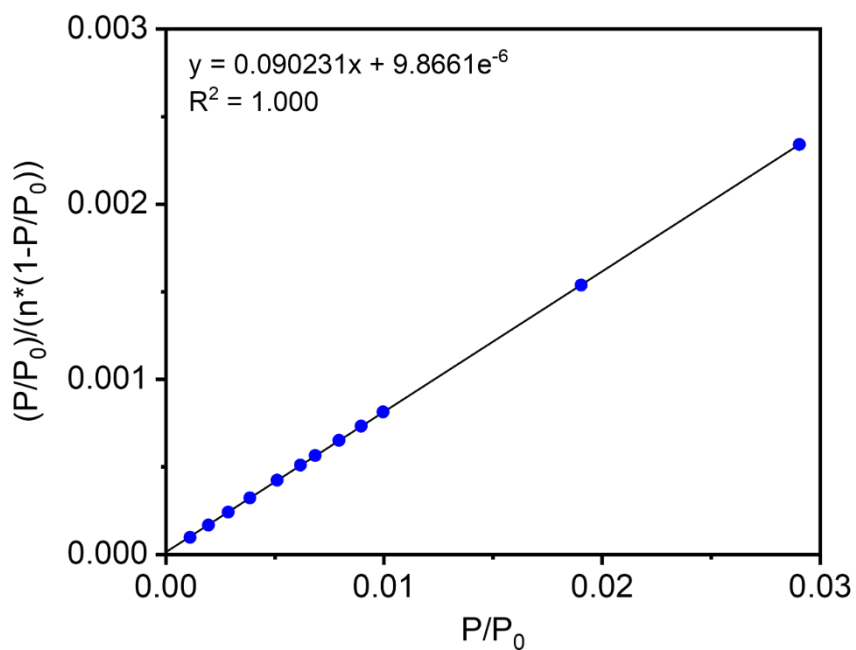

**Figure S131.** Linearized BET plot for the N<sub>2</sub> adsorption data of Zn<sub>2</sub>(*m*-dobdc) synthesized at 0.1 M.

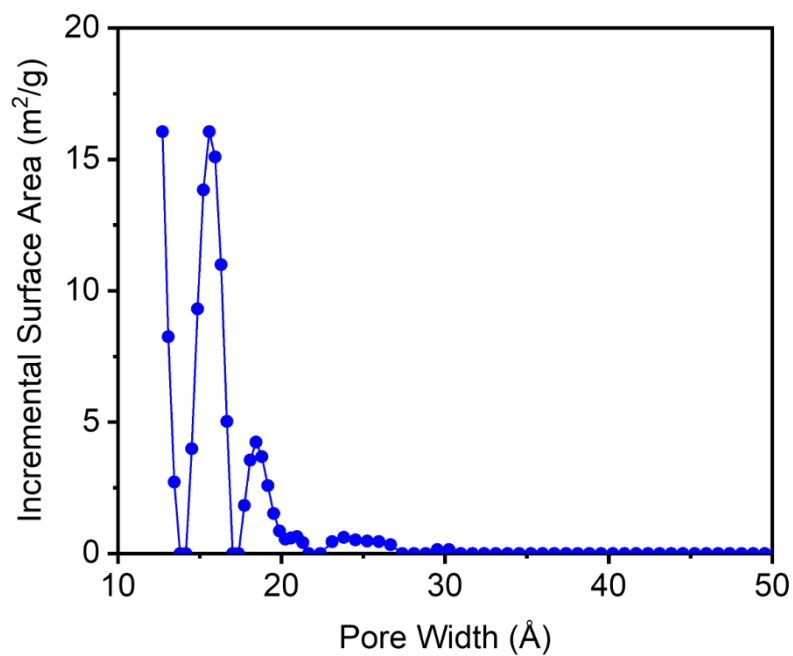

**Figure S132.** DFT-calculated pore size distribution for  $\text{Zn}_2(m\text{-dobdc})$  synthesized at 0.1 M, assuming a cylindrical pore geometry. The primary pore size is below the lower limit of the measurement.

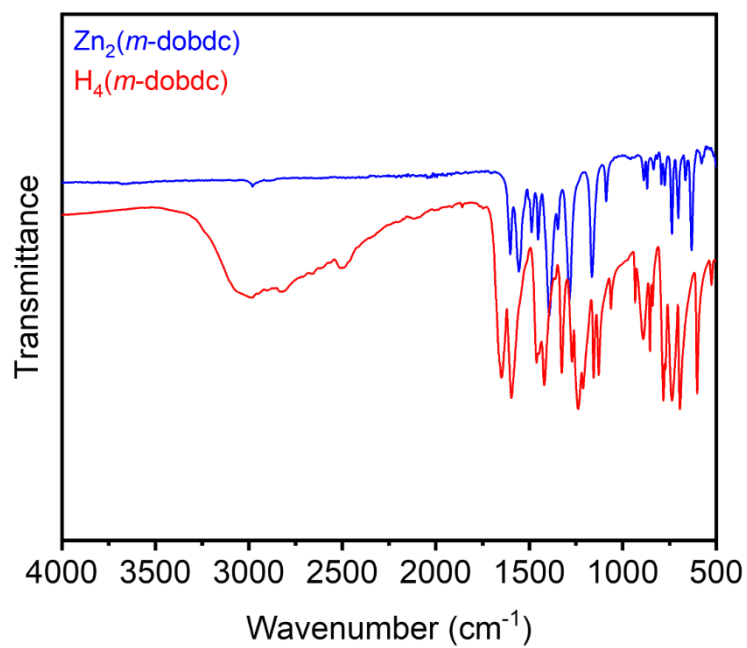

**Figure S133.** ATR-IR spectra of  $\text{Zn}_2(m\text{-dobdc})$  synthesized at 0.1 M and the  $\text{H}_4(m\text{-dobdc})$  linker.

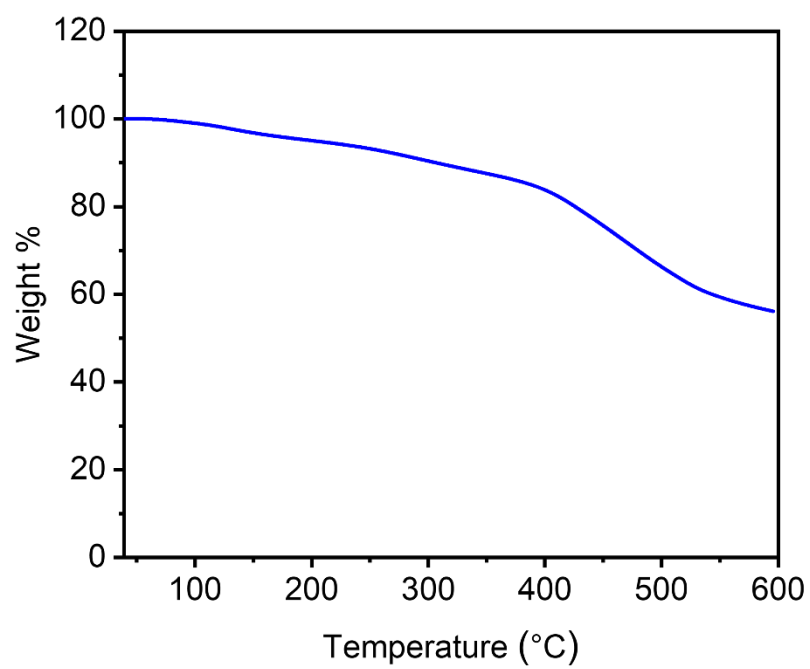

**Figure S134.** Thermogravimetric decomposition profile under  $\text{N}_2$  of  $\text{Zn}_2(m\text{-dobdc})$  synthesized at 0.1 M.

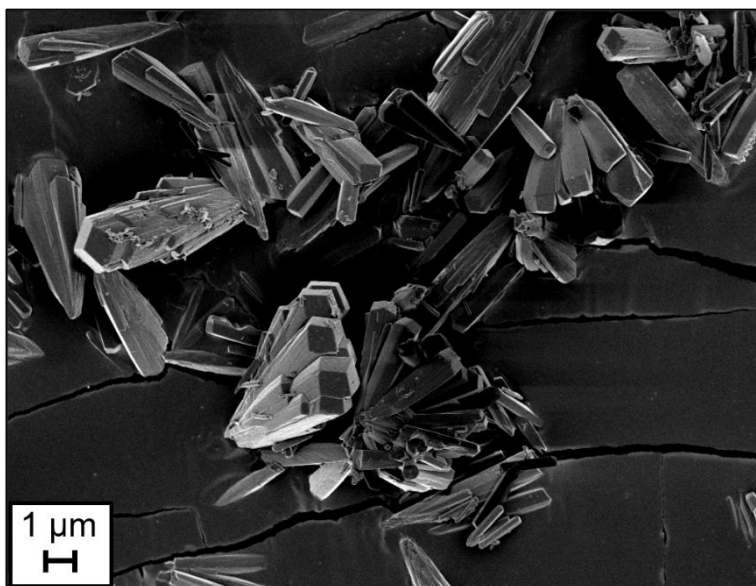

**Figure S135.** SEM image of Zn<sub>2</sub>(*m*-dobdc).

## 6. Crystallographic Analysis.

**PXRD measurements for crystalline domain size analysis.** Volume-weighted average crystalline domain sizes (LVol-IB) of samples were determined through Pawley refinement of their PXRD ( $\lambda = 1.5418 \text{ \AA}$ ) patterns. Space groups and preliminary unit cell parameters were obtained from the SCXRD structures of  $\text{Zn}_2(\text{dobdc})$ ,  $\text{Zn}_2(\text{dobpdc})$ , and  $\text{Co}_2(m\text{-dobdc})$ , as appropriate.<sup>9,14,19</sup> Background coefficients (described by 5–10<sup>th</sup> order Chebyshev polynomials), zero-point error, unit cell, and peak profile (FP) parameters were freely refined. Crystallite size was modeled using Gaussian convolutions and freely refined. Strain was modeled using Gaussian and Lorentzian convolutions and freely refined.

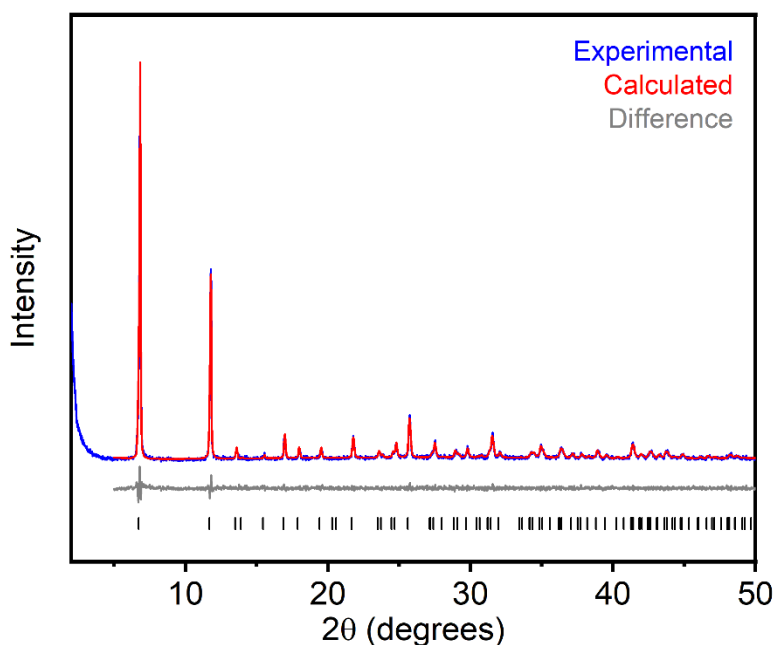

**Figure S136.** Representative Pawley refinement of the PXRD ( $\lambda = 1.54175 \text{ \AA}$ ) pattern of a synthesized MOF to determine LVol-IB values. The analysis shown is of  $\text{Zn}_2(\text{dobdc})$  synthesized at 0.5 M. Refined unit cell parameters: space group =  $R\bar{3}$ ,  $a = 26.013(3) \text{ \AA}$ ,  $c = 6.7786(13) \text{ \AA}$ . Black ticks correspond to calculated Bragg positions. Goodness of fit parameters:  $R_{\text{wp}} = 11.54\%$ ,  $R_p = 8.80\%$ ,  $R_{\text{exp}} = 25.53\%$ ,  $\text{GoF} = 0.45$ . LVol-IB:  $145 \pm 4.2 \text{ nm}$ .

**Table S13.** Volume-weighted average crystalline domain sizes (LVol-IB) of synthesized salicylate-based frameworks and associated errors. The largest domain sizes are consistently observed for the Zn-based frameworks and the smallest for the Ni-based frameworks.

| Sample                             | LVol-IB (nm) |             |            |
|------------------------------------|--------------|-------------|------------|
|                                    | 0.1 M        | 0.5 M       | 1.0 M      |
| Mg <sub>2</sub> (dobdc)            | 195 ± 11     | 54 ± 3.4    | 42 ± 3.1   |
| Co <sub>2</sub> (dobdc)            | 56.3 ± 16    | 45.8 ± 12.8 | 63.2 ± 9.5 |
| Ni <sub>2</sub> (dobdc)            | 11.3 ± 0.6   | 10.4 ± 0.9  | 12.9 ± 0.8 |
| Zn <sub>2</sub> (dobdc)            | 773 ± 151    | 145 ± 4.2   | 289 ± 19   |
| Mg <sub>2</sub> (dobpdc)           | 10.5 ± 1.1   | 30 ± 3.6    | 15.7 ± 2.7 |
| Co <sub>2</sub> (dobpdc)           | 34.1 ± 4.6   | 43.3 ± 4.9  | 31.6 ± 9.6 |
| Ni <sub>2</sub> (dobpdc)           | 9 ± 0.2      | 9.7 ± 0.3   | 10.4 ± 0.8 |
| Zn <sub>2</sub> (dobpdc)           | 523 ± 68     | 157 ± 7.2   | 153 ± 9.8  |
| Mg <sub>2</sub> ( <i>m</i> -dobdc) | 67.8 ± 3.1   | 37 ± 2.5    | 59 ± 3     |
| Co <sub>2</sub> ( <i>m</i> -dobdc) | 156 ± 6.3    | 63.4 ± 7.7  | 116 ± 3    |
| Ni <sub>2</sub> ( <i>m</i> -dobdc) | 66 ± 0.7     | 46.5 ± 2.4  | 38.7 ± 2   |
| Zn <sub>2</sub> ( <i>m</i> -dobdc) | 330 ± 31     | N/A         | N/A        |

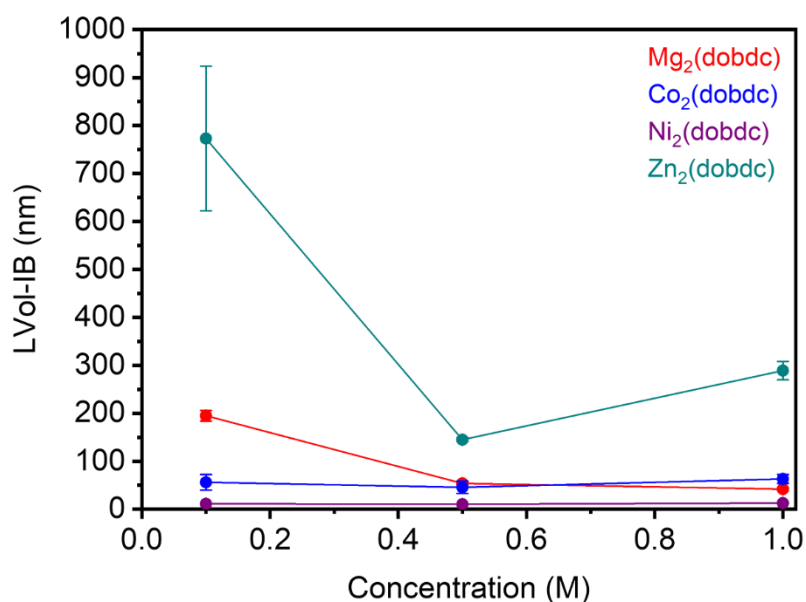

**Figure S137.** Concentration vs volume-weighted average crystalline domain sizes (LVol-IB) and associated errors of synthesized  $M_2(\text{dobdc})$  samples. Some error bars are too small to see.

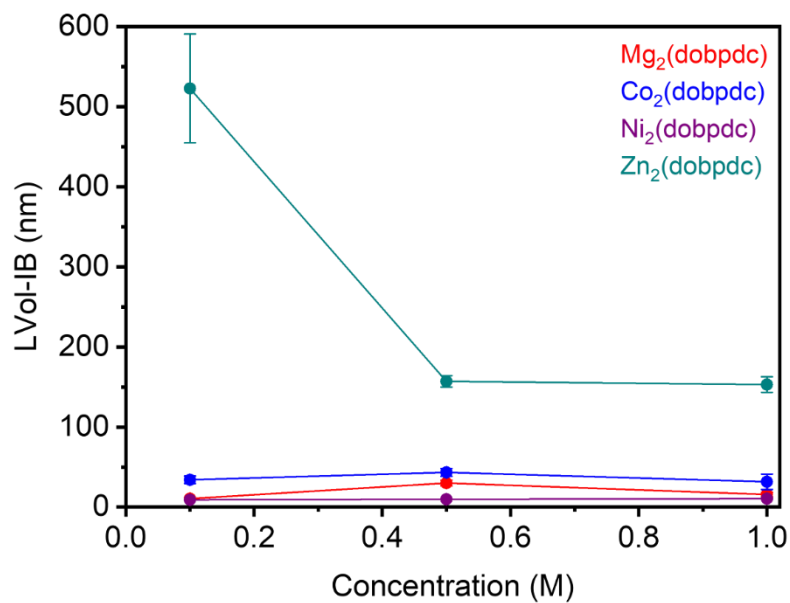

**Figure S138.** Concentration vs volume-weighted average crystalline domain sizes (LVol-IB) and associated errors of synthesized  $M_2(\text{dobpdc})$  samples. Some error bars are too small to see.



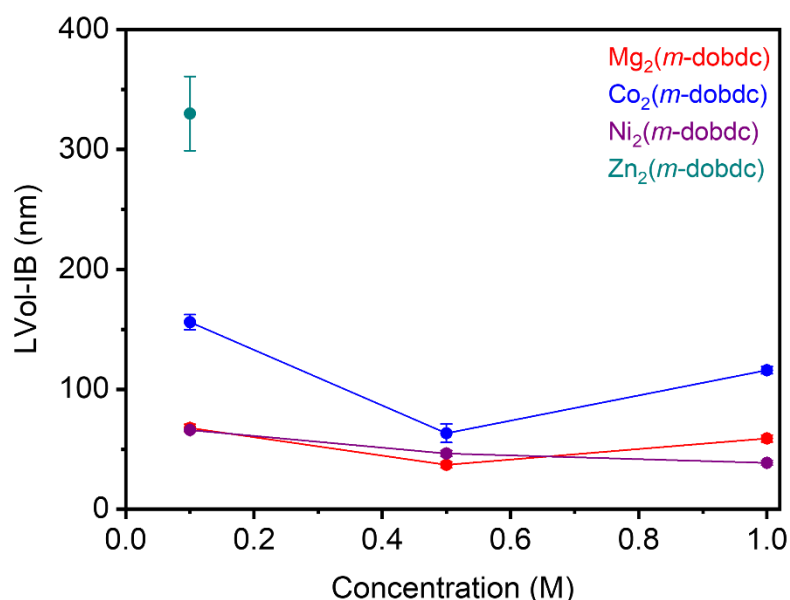

**Figure S139.** Concentration vs volume-weighted average crystalline domain sizes (LVol-IB) and associated errors of synthesized  $M_2(m\text{-dobdc})$  samples. Some error bars are too small to see.

**PXRD measurements for Rietveld refinement.** Samples for Rietveld refinement were loosely packed into glass capillaries (1.0 mm OD, approximately 10 mg) in an  $N_2$ -filled glovebox, then sealed under  $N_2$  with capillary wax and mounted using a capillary spin attachment head. Samples were spun at a rate of 1 rotation per step during data collection with a  $0.01^\circ$  step size at a minimum scan rate of  $0.1^\circ/\text{min}$ . Data were collected in transmission mode and Debye-Scherrer geometry at 298 K using a Rigaku Smartlab SE Multipurpose diffractometer equipped with Cu  $K\alpha$  radiation ( $\lambda = 1.5418 \text{ \AA}$ ), a Göbel mirror, a scattered radiation protector, a D/teX Ultra 250 detector, and mounting the following optics: incident Soller slits ( $2.5^\circ$ ), length-limiting slit (10 mm), incident slit (1.0 mm), receiving slit 1 (16 mm), receiving slit 2 (open), parallel slit analyzer (open), and receiving Soller slits ( $2.5^\circ$ ). The generator was set at 40 kV and 45 mA.

Analysis of the PXRD data of  $Zn_2(m\text{-dobdc})$  was performed using TOPAS V6. A structureless Pawley refinement of the PXRD pattern of  $Zn_2(m\text{-dobdc})$  based on the unit cell and space group of the isostructural MOF  $Co_2(m\text{-dobdc})$ <sup>14</sup> effectively modeled the observed (93) reflections, providing initial unit cell and space group parameters, as well as a background model used in the subsequent Rietveld refinement of  $Zn_2(m\text{-dobdc})$ . An initial structural model of  $Zn_2(m\text{-dobdc})$  was generated in the Materials Studio software package based on these parameters and used for Rietveld refinement. During the Rietveld refinement, the positions of C and O atoms of the carboxylate groups were refined but O–C–O bond angles were constrained to approximately  $124^\circ$ , and constraints were added to flatten the carboxylates. The hydroxyl O atoms and Zn atoms were freely refined. A rigid, idealized model was employed for aromatic carbon atoms of the linker based on their positions in  $Co_2(m\text{-dobdc})$ .<sup>14</sup> Hydrogen atoms were placed at ideal positions and C–H bond lengths were fixed at  $0.95 \text{ \AA}$ . The occupancies of all atoms were fixed at unity. A single

refined isotropic thermal parameter was assigned to each C, O, and H atom. The isotropic thermal parameter of Zn was freely refined. Unit cell parameters were freely refined. The sample background was modeled by an 8<sup>th</sup> order Chebyshev polynomial and fixed at values determined through Pawley refinement. Gaussian and Lorentzian convolutions were used to model crystallite size and strain, respectively. Minor preferred orientation not eliminated by spinning the sample was modeled with a one-directional March-Dollase correction (2 -1 0). The calculated diffraction pattern for the final structural model of Zn<sub>2</sub>(*m*-dobdc) is in excellent agreement with the experimental diffraction pattern (main text Figure 6B). CCDC deposition number: 2461999.

**Table S14.** Fractional atomic coordinates and displacement parameters in Zn<sub>2</sub>(*m*-dobdc). CCDC deposition number: 2461999. Values in parenthesis indicate one standard deviation from the parameter value.

| Atom | <i>x</i>   | <i>y</i>    | <i>z</i>   | Multiplicity | Occupancy | <i>B</i> <sub>eq</sub> (Å <sup>2</sup> ) |
|------|------------|-------------|------------|--------------|-----------|------------------------------------------|
| Zn1  | 0.6568(2)  | 0.61971(14) | 0.4608(17) | 18           | 1         | 2.19(10)                                 |
| O1   | 0.5881(5)  | 0.5909(5)   | 0.652(3)   | 18           | 1         | 2.7(2)                                   |
| O2   | 0.6160(6)  | 0.5616(6)   | 1.250(3)   | 18           | 1         | 2.7(2)                                   |
| O3   | 0.6442(5)  | 0.6292(7)   | 1.019(3)   | 18           | 1         | 2.7(2)                                   |
| C1   | 0.6134(10) | 0.5775(9)   | 1.081(3)   | 18           | 1         | 2.7(2)                                   |
| C2   | 0.5513     | 0.5441      | 0.7562     | 18           | 1         | 2.7(2)                                   |
| C3   | 0.5605     | 0.534       | 0.9559     | 18           | 1         | 2.7(2)                                   |
| C4   | 0.5178     | 0.4822      | 1.0494     | 9            | 1         | 2.7(2)                                   |
| C5   | 0.5        | 0.5         | 0.6666667  | 9            | 1         | 2.7(2)                                   |
| H1   | 0.49376    | 0.50624     | 0.53296    | 9            | 1         | 2.7(2)                                   |
| H2   | 0.52435    | 0.47565     | 1.18202    | 9            | 1         | 2.7(2)                                   |

**Table S15.** Bond angles and bond lengths in Zn<sub>2</sub>(*m*-dobdc). Values in parenthesis indicate one standard deviation from the parameter value.

| Bond       | Angle (°) | Bond      | Angle (°)    | Bond   | Distance (Å) |
|------------|-----------|-----------|--------------|--------|--------------|
| O3–Zn1–O2  | 99.7(9)   | Zn1–O3–C1 | 132.0(15)    | Zn1–O2 | 1.960(19)    |
| O1–Zn1–O3  | 97.2(8)   | C1–O3–Zn1 | 121.6(6)     | Zn1–O3 | 2.007(14)    |
| O1–Zn1–O2  | 98.5(7)   | O3–C1–O2  | 124.5(18)    | Zn1–O1 | 2.020(19)    |
| O3–Zn1–O1  | 83.3(8)   | C3–C1–O3  | 117.5(19)    | Zn1–O3 | 2.11(2)      |
| O3–Zn1–O3  | 81.8(3)   | C3–C1–O2  | 116.8(15)    | Zn1–O1 | 2.148(16)    |
| O3–Zn1–O2  | 177.4(6)  | O3–C1–C3  | 139.6(16)    | O1–C2  | 1.312(14)    |
| O1–Zn1–O3  | 82.5(7)   | C5–C2–O1  | 118.5(9)     | O2–C1  | 1.23(3)      |
| O1–Zn1–O1  | 165.7(11) | C3–C2–C5  | 116.4939(7)  | O3–C1  | 1.24(2)      |
| O1–Zn1–O3  | 82.6(7)   | C3–C2–O1  | 125.0(9)     | C1–C3  | 1.52(2)      |
| O1–Zn1–O2  | 95.6(8)   | C2–C3–C4  | 119.0714(7)  | C2–C5  | 1.38550(2)   |
| Zn1–O1–C2  | 141.8(11) | C1–C3–C2  | 124.5(8)     | C2–C3  | 1.42330(4)   |
| Zn1–O1–Zn1 | 90.8(4)   | C1–C3–C4  | 116.3(8)     | C3–C4  | 1.39285(2)   |
| Zn1–O1–C2  | 117.9(14) | C3–C4–H2  | 118.6024(7)  | C4–H2  | 0.94712(2)   |
| Zn1–O2–C1  | 121.4(14) | C3–C4–C3  | 122.7947(15) | H1–C5  | 0.94995(2)   |
| Zn1–O3–C1  | 134.1(17) | C2–C5–H1  | 116.9755(7)  |        |              |
| Zn1–O3–Zn1 | 92.4(7)   | C2–C5–C2  | 126.0038(14) |        |              |

**Indexing and unit cell refinement of the PXRD patterns of unknown phases.** All apparent reflections in the PXRD pattern of the unknown Mg-based sample synthesized using H<sub>4</sub>dobdc at 0.1 M were identified by visual inspection (58 total) and indexed using TOPAS V6. Its unit cell was suggested with high figures of merit (space group = *P*21/*c*, *a* = 6.8794 Å, *b* = 8.2287 Å, *c* = 16.9392 Å, β = 79.7980°, GoF = 3.79). A Pawley refinement based on this solution was performed to obtain precise unit cell parameters (Figure S140). Other unidentified crystalline products of Zn<sub>2</sub>(dobpdc) and Mg<sub>2</sub>(*m*-dobdc) syntheses could not be definitively indexed, precluding unit cell determination in those cases.

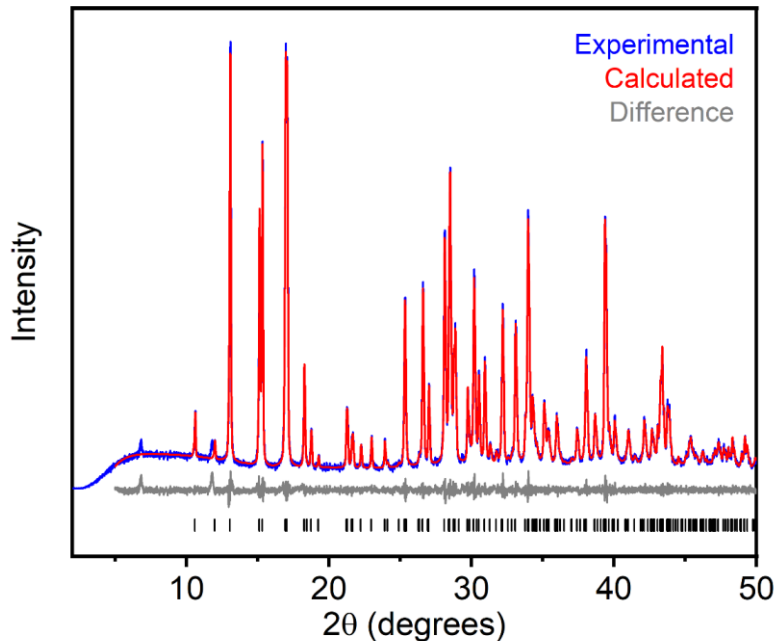

**Figure S140.** Pawley refinement of the PXRD ( $\lambda = 1.54175 \text{ \AA}$ ) pattern of the Mg-based sample synthesized using  $\text{H}_4\text{dobdc}$  at 0.1 M. The minor peaks at approx.  $6.8^\circ$  and  $11.8^\circ$  are attributed to a small amount of  $\text{Mg}_2(\text{dobdc})$ . Refined unit cell parameters: space group =  $P21/c$ ,  $a = 6.88228(16) \text{ \AA}$ ,  $b = 8.22969(19) \text{ \AA}$ ,  $c = 16.9478(4) \text{ \AA}$ ,  $\beta = 79.8280(14)^\circ$ . Black ticks correspond to calculated Bragg positions. Goodness of fit parameters:  $R_{\text{wp}} = 5.48\%$ ,  $R_{\text{p}} = 3.96\%$ ,  $R_{\text{exp}} = 4.69\%$ ,  $\text{GoF} = 1.17$ .

## 7. CO<sub>2</sub>/N<sub>2</sub> Selectivity Calculations.

CO<sub>2</sub> and N<sub>2</sub> adsorption data were fit using the dual-site Langmuir model (eq. S1), where  $Q(P)$  is the predicted uptake  $Q$  at pressure  $P$  in mmol/g,  $Q_{sati}$  is the saturation pressure of binding site  $i$  in mmol/g,  $b_i$  is the Langmuir parameter of site  $i$ ,  $v_i$  is the Freundlich parameter of site  $i$ ,  $-S_i$  is the entropy of binding site  $i$  in J/mol•K,  $R$  is the ideal gas constant,  $E_i$  is the enthalpy of adsorption for binding site  $i$  in kJ/mol, and  $T$  is the temperature in K. The isotherms were fit with  $v_1$  and  $v_2$  set as 1. Fits were obtained using Solver in Microsoft Excel.

$$Q(P) = \frac{Q_{sat1}b_1P^{v_1}}{1+b_1P^{v_1}} + \frac{Q_{sat2}b_2P^{v_2}}{1+b_2P^{v_2}}; b_i = e^{\left(\frac{-S_i}{R}\right)\left(\frac{1000 \cdot E_i}{RT}\right)} \quad \text{eq. S1}$$

Ideal Adsorbed Solution Theory (IAST) was used to calculate adsorption selectivities from the single-component adsorption isotherms.<sup>20,21</sup> This approach solves for the spreading pressure and subsequently the composition of the adsorbed phase for each mixture. The IAST selectivity ( $S$ ) was determined using eq. S2, where  $x_i$  is the mole fraction in the adsorbed phase and  $y_i$  is the mole fraction in the gas phase of component  $i$ . The IAST selectivities for various mixtures were determined using Mathematica.

$$S = \frac{x_{CO_2}/x_{N_2}}{y_{CO_2}/y_{N_2}} \quad \text{eq. S2}$$

**Table S16.** Langmuir fit parameters determined for fits to the dual-site Langmuir model for the isotherms shown in main text Figure 6C.

| Parameter                        | Zn <sub>2</sub> (dobdc) |                | Zn <sub>2</sub> ( <i>m</i> -dobdc) |                      |
|----------------------------------|-------------------------|----------------|------------------------------------|----------------------|
|                                  | CO <sub>2</sub>         | N <sub>2</sub> | CO <sub>2</sub>                    | N <sub>2</sub>       |
| <b>Q<sub>sat1</sub> (mmol/g)</b> | 8.29                    | 0.00           | 7.50                               | 1.2×10 <sup>-4</sup> |
| <b>S1 (in multiples of R)</b>    | 0.215                   | 0.396          | 0.197                              | 0.100                |
| <b>E1 (kJ/mol)</b>               | 1.37                    | 0.019          | 2.66                               | 0.00                 |
| <b>V1</b>                        | 1.00                    | 1.00           | 1.00                               | 1.00                 |
| <b>Q<sub>sat2</sub> (mmol/g)</b> | 0.00                    | 6.55           | 0.00                               | 4.60                 |
| <b>S2 (in multiples of R)</b>    | 2.25                    | 3.24           | 2.25                               | 2.61                 |
| <b>E2 (kJ/mol)</b>               | 0.507                   | 0.181          | 0.507                              | 0.197                |
| <b>V2</b>                        | 1.00                    | 1.00           | 1.00                               | 1.00                 |

## 8. Solvothermal Synthesis of Salicylate MOFs.

**General Procedure.** In a 250 mL Pyrex jar,  $M(\text{NO}_3)_2 \cdot 6\text{H}_2\text{O}$  (25 mmol or 2.5 mmol for 0.1 M and 0.01 M synthesis, respectively, 2.50 equiv.) and linker (10 mmol or 1 mmol for 0.1 M and 0.01 M synthesis, respectively, 1.00 eq) were dissolved in solvent (100 mL). Solvent mixtures were selected based on literature conditions. For  $M_2(\text{dobpdc})$  materials, the synthesis was only conducted at a concentration of 0.01 M. The mixture was sonicated until all of the solids dissolved. The jar was placed in an oven that was preheated at 120 °C and kept at this temperature for 24 h. At this time, the heterogenous mixture was allowed to cool to room temperature, the solvent was decanted, and fresh MeOH (50 mL) was added. The mixture was allowed to stand at 60 °C for 18 h. At this time, the MeOH was decanted and replaced with fresh MeOH (50 mL). This process was repeated for a total of six hot MeOH soaks. After the final soak, the solvent was decanted, and the remaining solid was allowed to dry in air. The sample was activated under high vacuum ( $<10 \mu\text{bar}$ ), ramping the temperature slowly to 180 °C (0.1 °C/min). The sample was allowed to stand at 180 °C under high vacuum ( $<10 \mu\text{bar}$ ) for 12 h prior to gas adsorption analysis.

**Table S17.** Solvothermal syntheses of salicylate MOFs.

| Sample                        | Linker                     | Solvent Ratio                              | Yield (%) |        | BET Surface Area ( $\text{m}^2/\text{g}$ ) |               |
|-------------------------------|----------------------------|--------------------------------------------|-----------|--------|--------------------------------------------|---------------|
|                               |                            |                                            | 0.1 M     | 0.01 M | 0.1 M                                      | 0.01 M        |
| $\text{Mg}_2(\text{dobdc})$   | $\text{H}_4\text{dobdc}$   | 18:1:1 DMF:EtOH: $\text{H}_2\text{O}^{22}$ | N/a       | 81     | no MOF                                     | $1506 \pm 1$  |
| $\text{Co}_2(\text{dobdc})$   | $\text{H}_4\text{dobdc}$   | 1:1:1 DMF:EtOH: $\text{H}_2\text{O}^{22}$  | 43        | 59     | $472 \pm 1$                                | $1092 \pm 2$  |
| $\text{Ni}_2(\text{dobdc})$   | $\text{H}_4\text{dobdc}$   | 8:1 DMF:MeOH <sup>22</sup>                 | 98        | 60     | $1154 \pm 1$                               | $1383 \pm 1$  |
| $\text{Zn}_2(\text{dobdc})$   | $\text{H}_4\text{dobdc}$   | 1:1 DMF:EtOH <sup>22</sup>                 | 89        | 60     | $354 \pm 1$                                | $1200 \pm 1$  |
| $\text{Mg}_2(\text{dobpdc})$  | $\text{H}_4\text{dobpdc}$  | 1:1 DMF:MeOH <sup>23</sup>                 | -         | 90     | -                                          | $2850 \pm 84$ |
| $\text{Co}_2(\text{dobpdc})$  | $\text{H}_4\text{dobpdc}$  | 1:1:1 DMF:EtOH: $\text{H}_2\text{O}^{23}$  | -         | 43     | -                                          | $3250 \pm 87$ |
| $\text{Ni}_2(\text{dobpdc})$  | $\text{H}_4\text{dobpdc}$  | 1:1:1 DMF:EtOH: $\text{H}_2\text{O}^{23}$  | -         | 76     | -                                          | $3240 \pm 87$ |
| $\text{Zn}_2(\text{dobpdc})$  | $\text{H}_4\text{dobpdc}$  | 1:1 DMF:EtOH <sup>23</sup>                 | -         | N/a    | -                                          | no MOF        |
| $\text{Mg}_2(m\text{-dobdc})$ | $\text{H}_4m\text{-dobdc}$ | 1:1 DMF:MeOH <sup>15</sup>                 | 30        | 46     | $791 \pm 1$                                | $1404 \pm 2$  |
| $\text{Co}_2(m\text{-dobdc})$ | $\text{H}_4m\text{-dobdc}$ | 1:1 DMF:MeOH <sup>16</sup>                 | 38        | 63     | $1107 \pm 1$                               | $1166 \pm 1$  |
| $\text{Ni}_2(m\text{-dobdc})$ | $\text{H}_4m\text{-dobdc}$ | 2:1 DMF:MeOH <sup>16</sup>                 | 85        | 83     | $1009 \pm 1$                               | $1080 \pm 1$  |

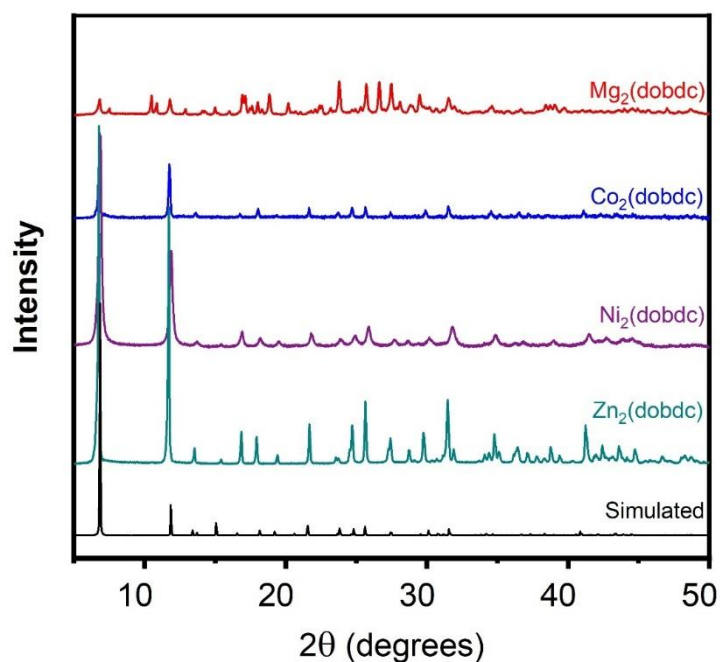

**Figure S141.** PXRD patterns of MeOH-solvated  $M_2(\text{dobdc})$  after 0.1 M solvothermal synthesis. The simulated pattern based on the previously reported SCXRD structure of  $\text{Zn}_2(\text{dobdc})$  is included for reference.<sup>9</sup> Phase-pure  $\text{Mg}_2(\text{dobdc})$  was not obtained under these conditions, as expected.<sup>24,25</sup>

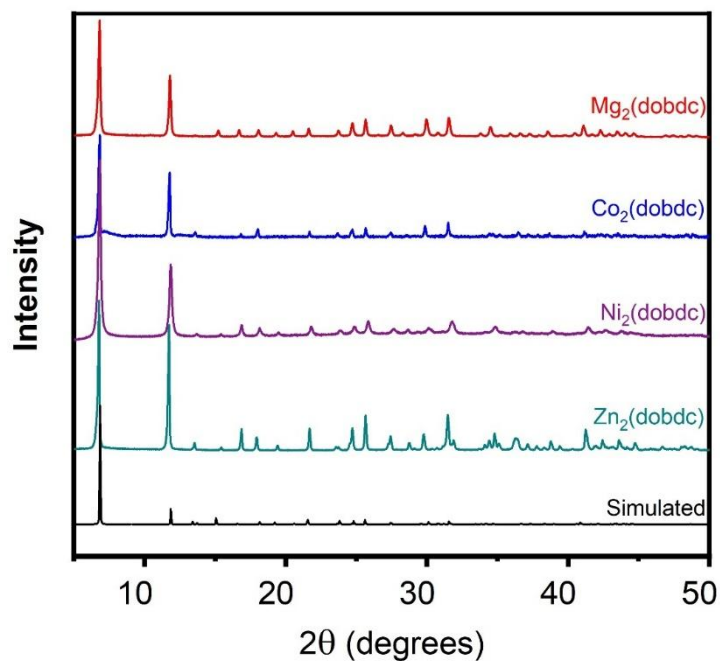

**Figure S142.** PXRD patterns of MeOH-solvated  $M_2(\text{dobdc})$  after 0.01 M solvothermal synthesis. The simulated pattern based on the previously reported SCXRD structure of  $\text{Zn}_2(\text{dobdc})$  is included for reference.<sup>9</sup>

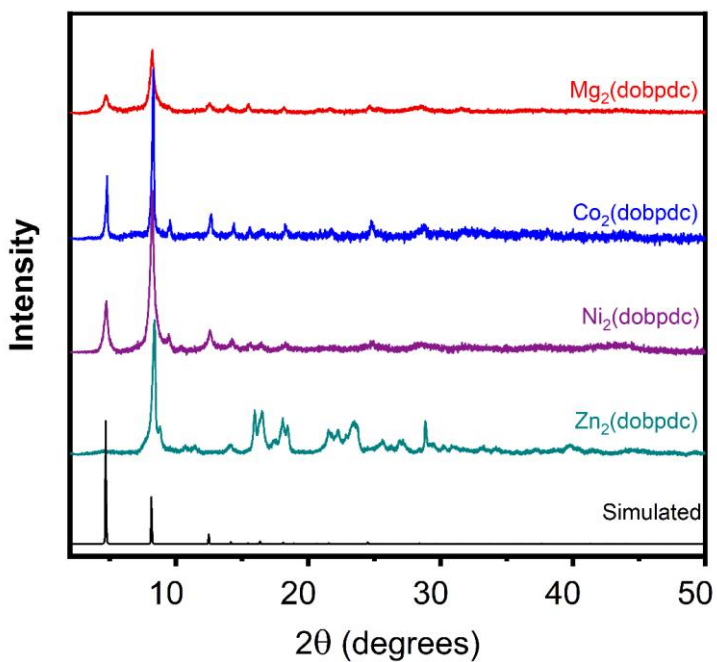

**Figure S143.** PXRD patterns of MeOH-solvated  $M_2(\text{dobpdc})$  after 0.01 M solvothermal synthesis. The simulated pattern based on the previously reported SCXRD structure of  $Zn_2(\text{dobpdc})$  is included for reference.<sup>13</sup>  $Zn_2(\text{dobpdc})$  was not obtained under these conditions.

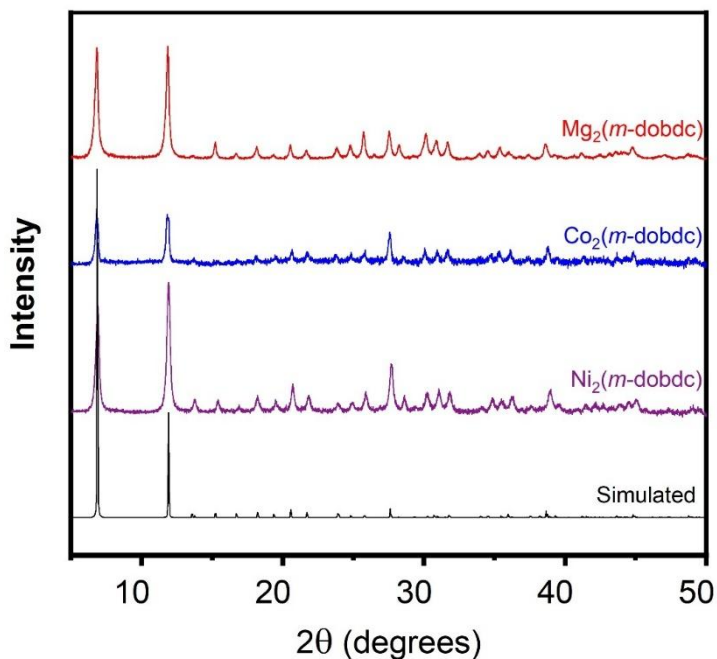

**Figure S144.** PXRD patterns of MeOH-solvated  $M_2(m\text{-dobdc})$  after 0.1 M solvothermal synthesis. The simulated pattern based on the previously reported SCXRD structure of  $Co_2(m\text{-dobdc})$  is included for reference.<sup>14</sup>



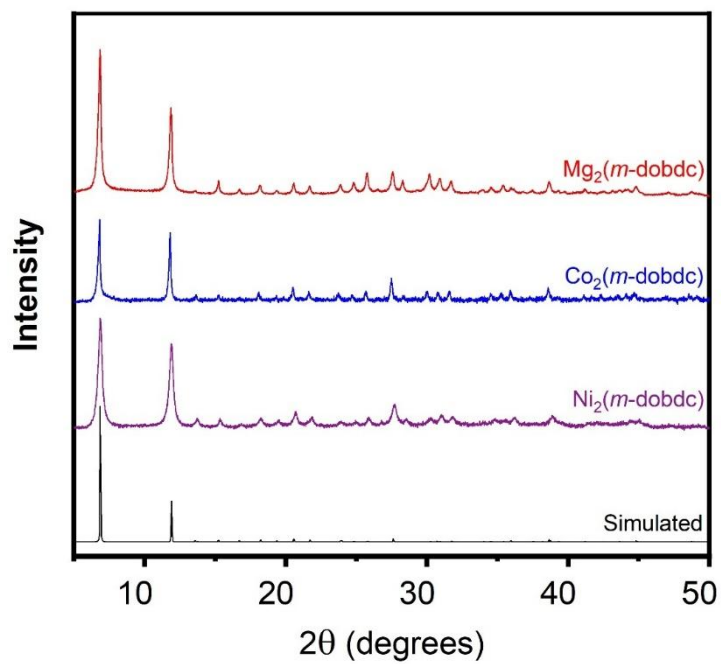

**Figure S145.** PXRD patterns of MeOH-solvated  $\text{M}_2(m\text{-dobdc})$  after 0.01 M solvothermal synthesis. The simulated pattern based on the previously reported SCXRD structure of  $\text{Co}_2(m\text{-dobdc})$  is included for reference.<sup>14</sup>

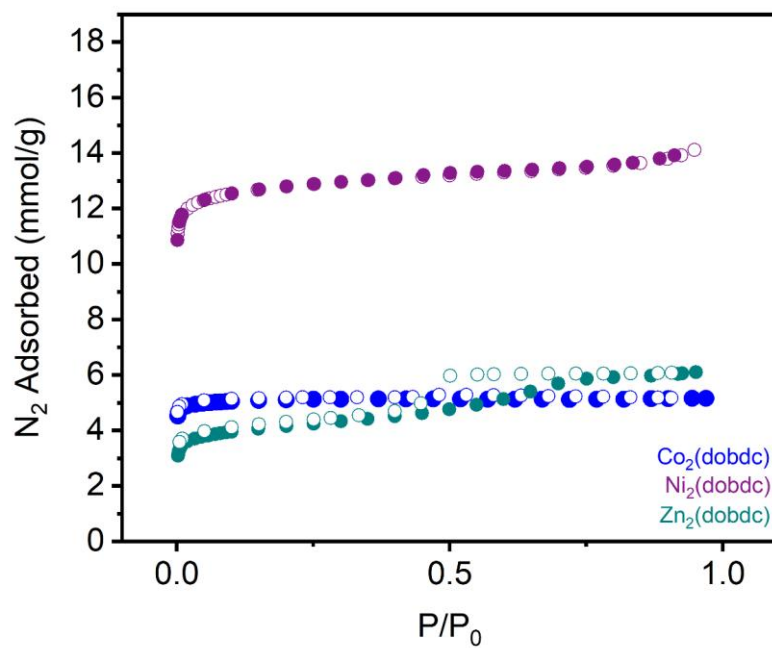

**Figure S146.** 77 K N<sub>2</sub> adsorption (filled circles) and desorption (open circles) isotherms of activated M<sub>2</sub>(dobdc) synthesized at 0.1 M. The BET surface areas determined from these data are  $472 \pm 1 \text{ m}^2/\text{g}$  (Co<sub>2</sub>(dobdc)),  $1154 \pm 1 \text{ m}^2/\text{g}$  (Ni<sub>2</sub>(dobdc)) and  $354 \pm 1 \text{ m}^2/\text{g}$  (Zn<sub>2</sub>(dobdc)). The Langmuir surface areas determined from these data are  $502 \pm 0.3 \text{ m}^2/\text{g}$  (Co<sub>2</sub>(dobdc)),  $1338 \pm 7 \text{ m}^2/\text{g}$  (Ni<sub>2</sub>(dobdc)), and  $580 \pm 14 \text{ m}^2/\text{g}$  (Zn<sub>2</sub>(dobdc)).

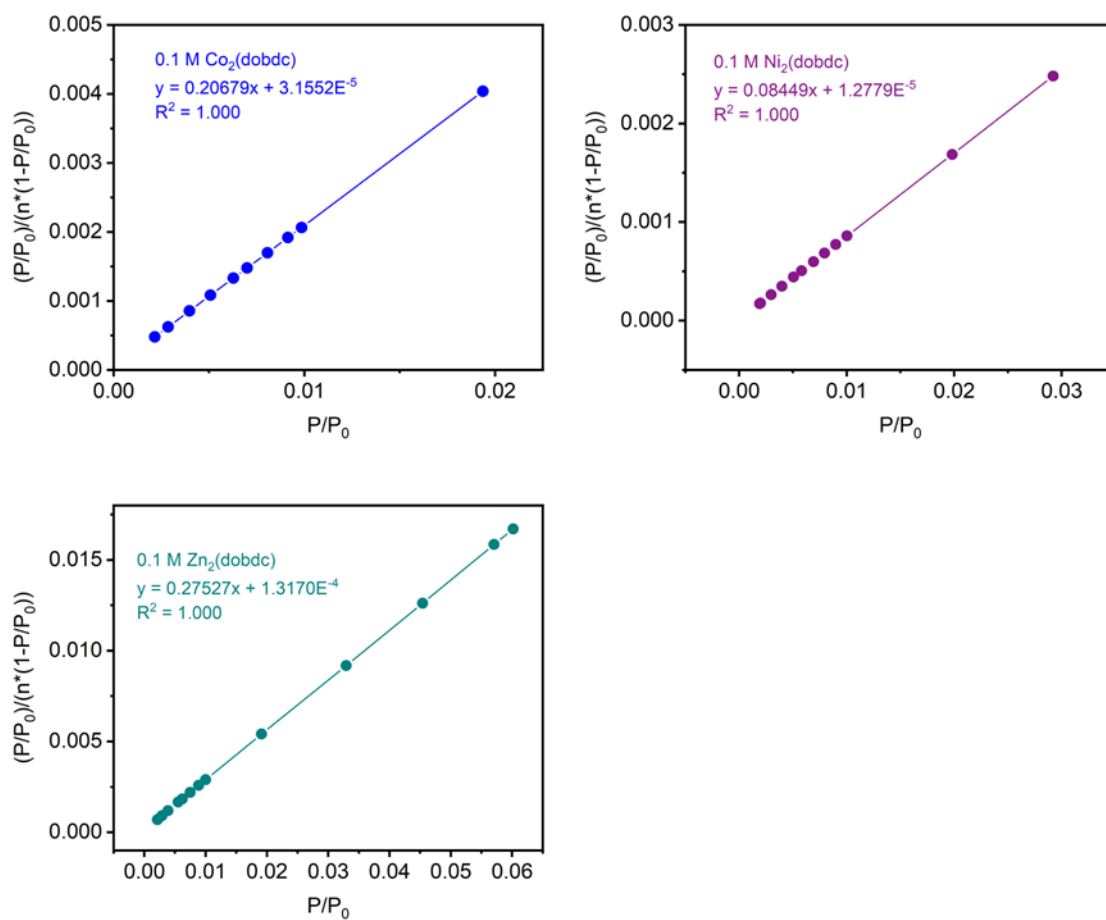

**Figure S147.** Linearized BET plots for the  $N_2$  adsorption data of  $M_2(\text{dobdc})$  synthesized at 0.1 M.

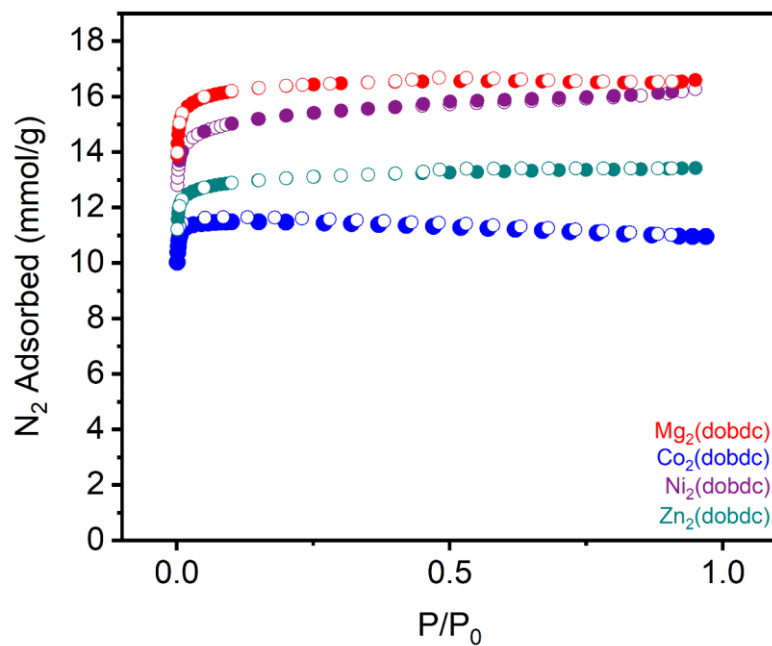

**Figure S148.** 77 K  $N_2$  adsorption (filled circles) and desorption (open circles) isotherms of activated  $M_2(\text{dobdc})$  synthesized at 0.01 M. The BET surface areas determined from these data are  $1506 \pm 1 \text{ m}^2/\text{g}$  ( $\text{Mg}_2(\text{dobdc})$ ),  $1092 \pm 2 \text{ m}^2/\text{g}$  ( $\text{Co}_2(\text{dobdc})$ ),  $1383 \pm 1 \text{ m}^2/\text{g}$  ( $\text{Ni}_2(\text{dobdc})$ ) and  $1200 \pm 0.5 \text{ m}^2/\text{g}$  ( $\text{Zn}_2(\text{dobdc})$ ). The Langmuir surface areas determined from these data are  $1615 \pm 1 \text{ m}^2/\text{g}$  ( $\text{Mg}_2(\text{dobdc})$ ),  $1077 \pm 3 \text{ m}^2/\text{g}$  ( $\text{Co}_2(\text{dobdc})$ ),  $1569 \pm 4 \text{ m}^2/\text{g}$  ( $\text{Ni}_2(\text{dobdc})$ ) and  $1307 \pm 1 \text{ m}^2/\text{g}$  ( $\text{Zn}_2(\text{dobdc})$ ).

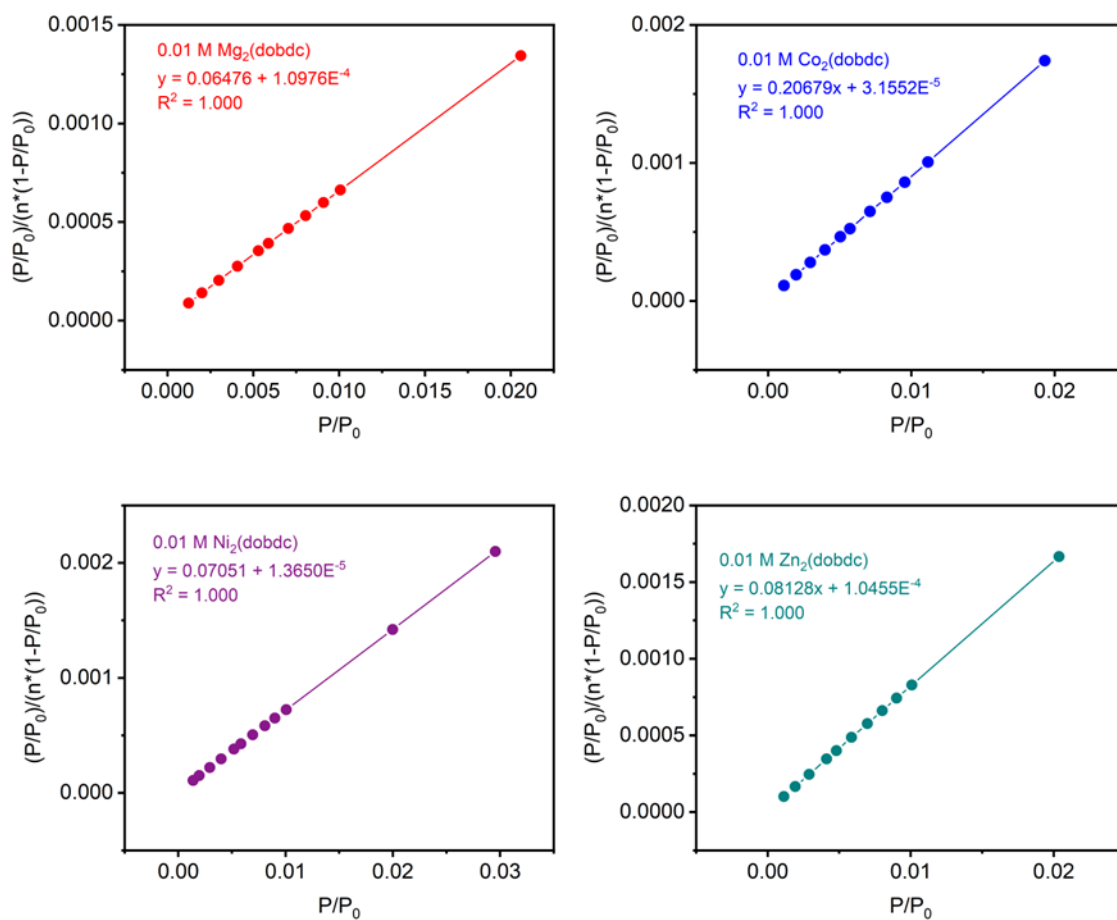

**Figure S149.** Linearized BET plots for the  $N_2$  adsorption data of  $M_2(dobdc)$  synthesized at 0.01 M.

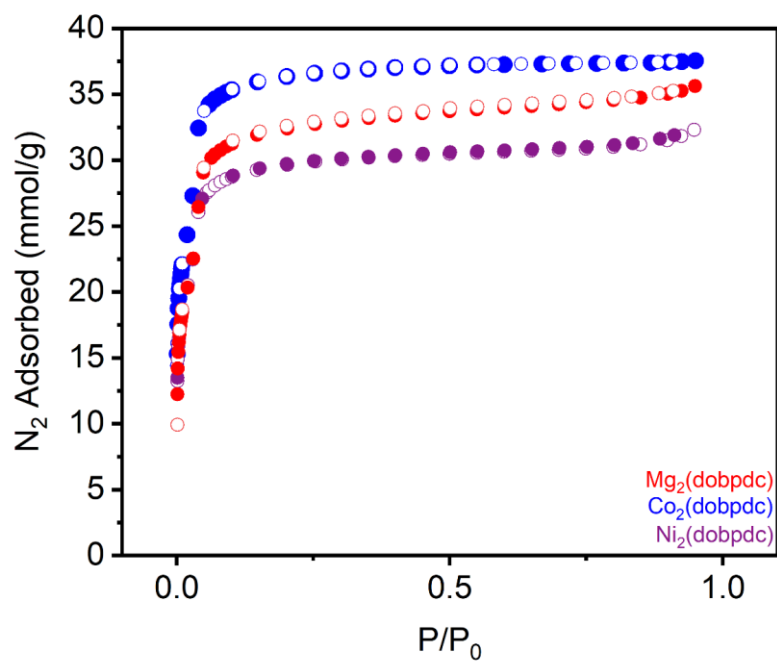

**Figure S150.** 77 K N<sub>2</sub> adsorption (filled circles) and desorption (open circles) isotherms of activated M<sub>2</sub>(dobpdc) synthesized at 0.01 M. The BET surface areas determined from these data are  $2850 \pm 84$  m<sup>2</sup>/g (Mg<sub>2</sub>(dobpdc)),  $3250 \pm 87$  m<sup>2</sup>/g (Co<sub>2</sub>(dobpdc)), and  $3240 \pm 87$  m<sup>2</sup>/g (Ni<sub>2</sub>(dobpdc)). The Langmuir surface areas determined from these data are  $3427 \pm 14$  m<sup>2</sup>/g (Mg<sub>2</sub>(dobpdc)),  $3674 \pm 4$  m<sup>2</sup>/g (Co<sub>2</sub>(dobpdc)), and  $3080 \pm 13$  m<sup>2</sup>/g (Ni<sub>2</sub>(dobpdc)).

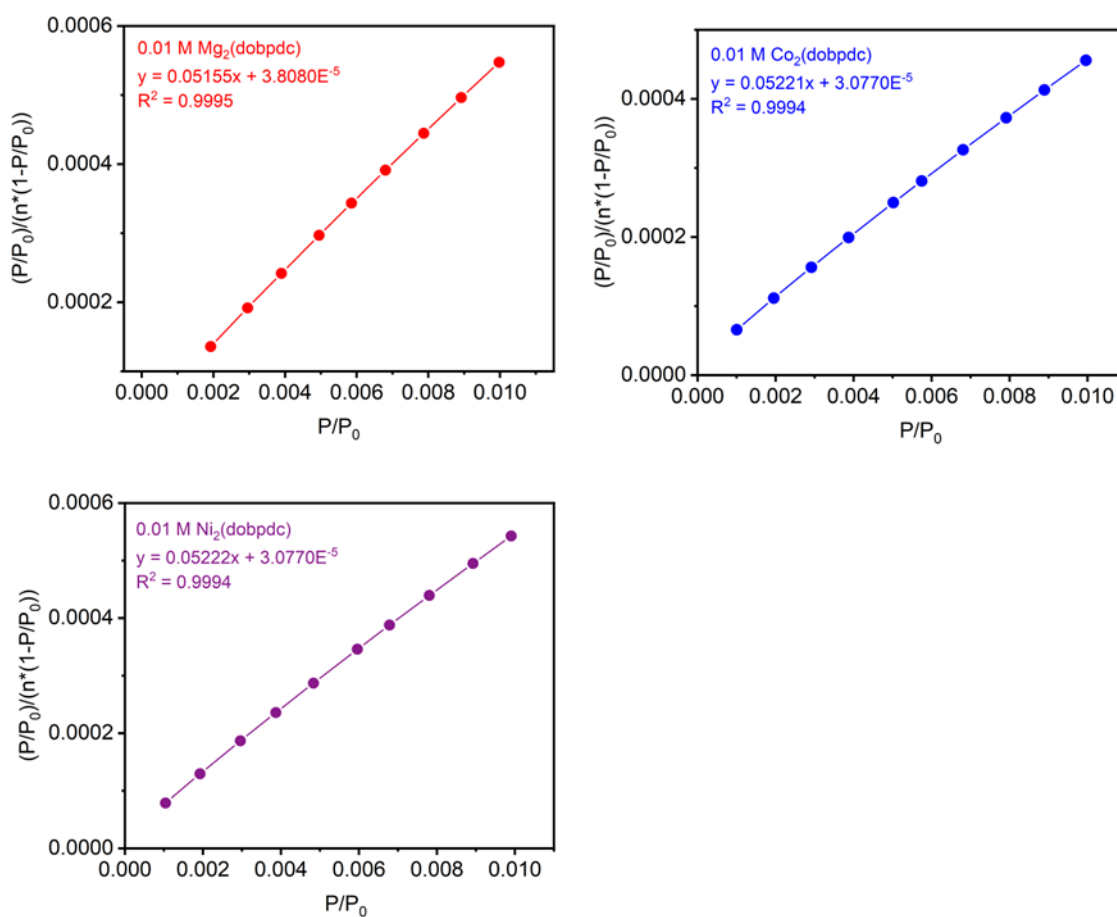

**Figure S151.** Linearized BET plots for the  $N_2$  adsorption data of  $M_2(\text{dobpdc})$  synthesized at 0.01 M.

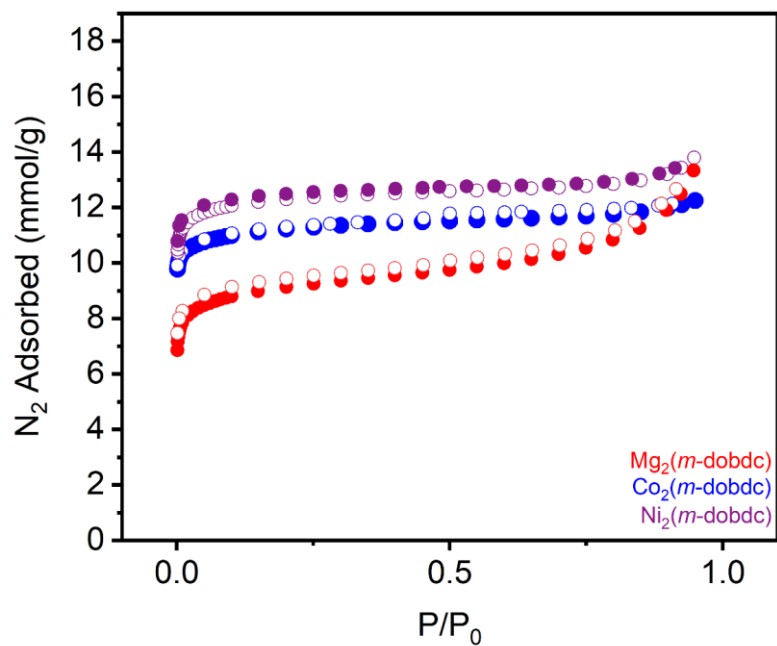

**Figure S152.** 77 K  $N_2$  adsorption (filled circles) and desorption (open circles) isotherms of activated  $M_2(m\text{-dobdc})$  synthesized at 0.1 M. The BET surface areas determined from these data are  $791 \pm 1 \text{ m}^2/\text{g}$  ( $Mg_2(m\text{-dobdc})$ ),  $1107 \pm 1 \text{ m}^2/\text{g}$  ( $Co_2(m\text{-dobdc})$ ), and  $1009 \pm 1 \text{ m}^2/\text{g}$  ( $Ni_2(m\text{-dobdc})$ ). The Langmuir surface areas determined from these data are  $1120 \pm 27 \text{ m}^2/\text{g}$  ( $Mg_2(m\text{-dobdc})$ ),  $1163 \pm 6 \text{ m}^2/\text{g}$  ( $Co_2(m\text{-dobdc})$ ), and  $1281 \pm 9 \text{ m}^2/\text{g}$  ( $Ni_2(m\text{-dobdc})$ ).



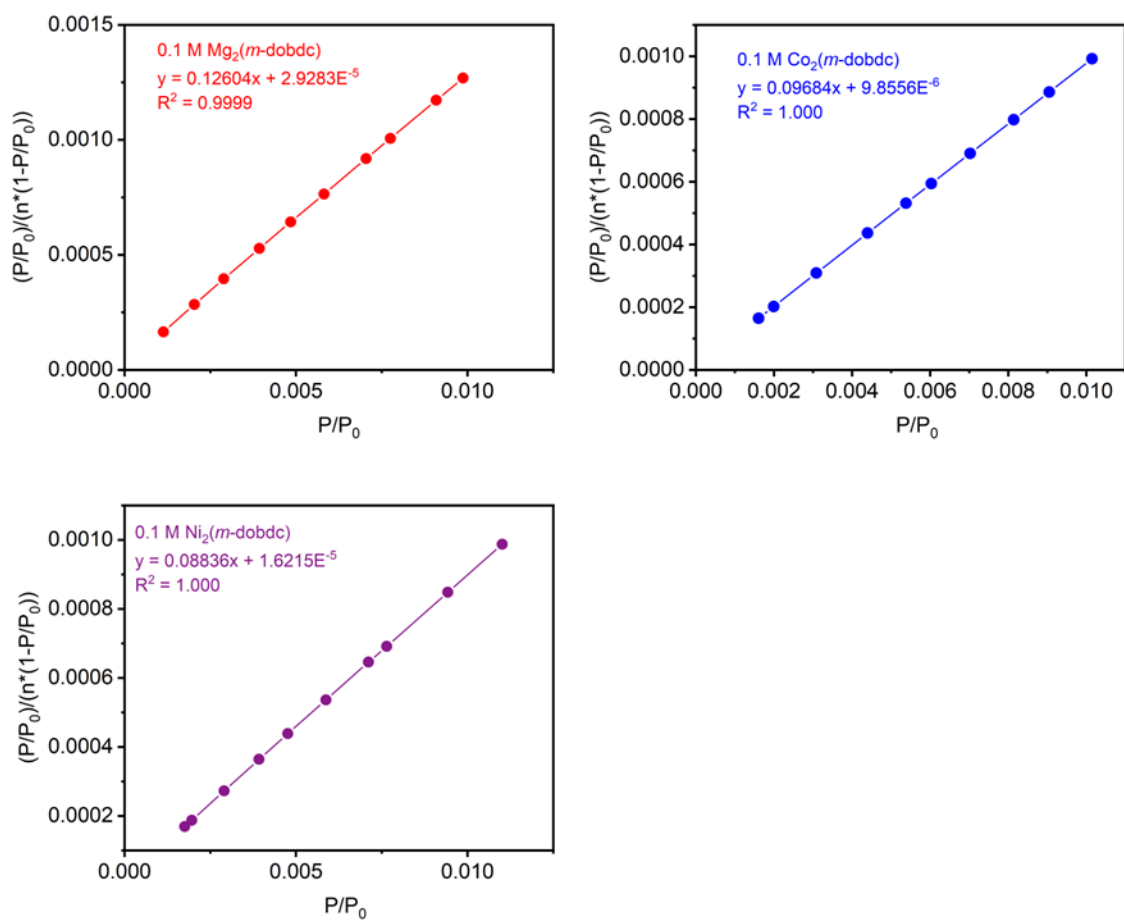

**Figure S153.** Linearized BET plots for the  $N_2$  adsorption data of  $M_2(m\text{-dobdc})$  synthesized at 0.1 M.

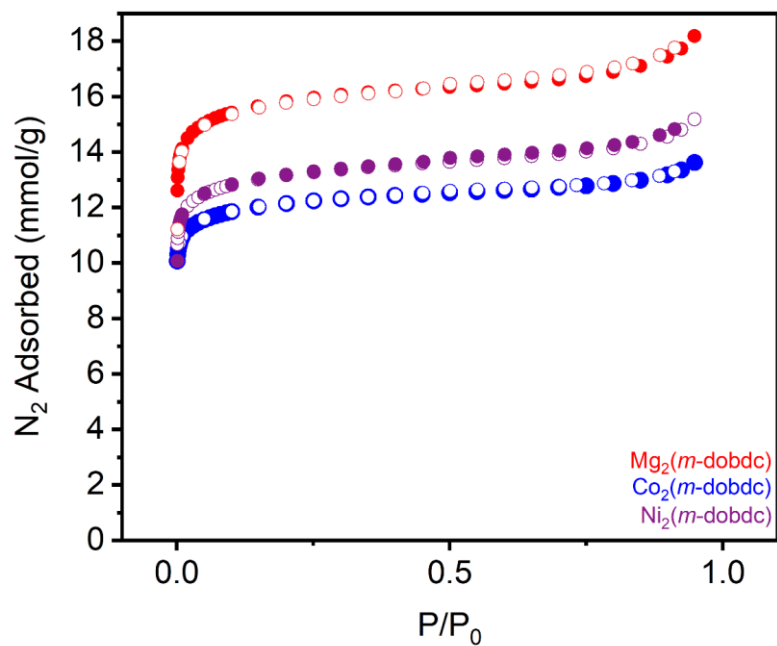

**Figure S154.** 77 K N<sub>2</sub> adsorption (filled circles) and desorption (open circles) isotherms of activated M<sub>2</sub>(*m*-dobdc) synthesized at 0.1 M. The BET surface areas determined from these data are  $1404 \pm 2$  m<sup>2</sup>/g (Mg<sub>2</sub>(*m*-dobdc)),  $1166 \pm 1$  m<sup>2</sup>/g (Co<sub>2</sub>(*m*-dobdc)), and  $1080 \pm 1$  m<sup>2</sup>/g (Ni<sub>2</sub>(*m*-dobdc)). The Langmuir surface areas determined from these data are  $1690 \pm 14$  m<sup>2</sup>/g (Mg<sub>2</sub>(*m*-dobdc)),  $1278 \pm 8$  m<sup>2</sup>/g (Co<sub>2</sub>(*m*-dobdc)), and  $1410 \pm 11$  m<sup>2</sup>/g (Ni<sub>2</sub>(*m*-dobdc)).

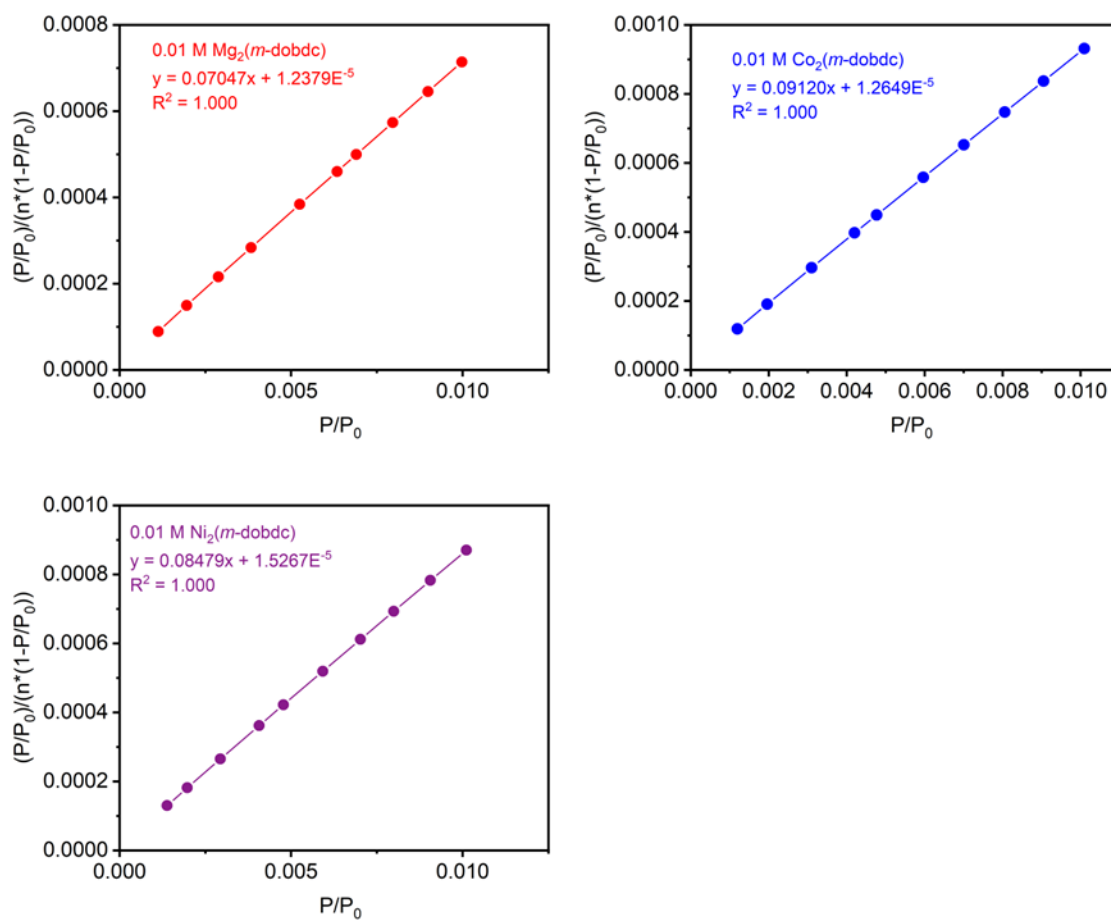

**Figure S155.** Linearized BET plots for the  $N_2$  adsorption data of  $M_2(m\text{-dobdc})$  synthesized at 0.01 M.

## 9. Large-Scale Synthesis of $\text{Zn}_2(m\text{-dobdc})$ .

In a 250 mL Pyrex jar,  $\text{Zn}(\text{NO}_3)_2 \cdot 6\text{H}_2\text{O}$  (3.72 g, 12.5 mmol, 2.50 equiv.) was dissolved in  $\text{H}_2\text{O}$  (25 mL). In a separate 100 mL round-bottom flask equipped with a stir bar,  $\text{NaOH}$  (800 mg, 20.0 mmol, 4.00 equiv.),  $\text{H}_4m\text{-dobdc}$  (1.0 g, 5.00 mmol, 1.00 equiv.), and  $\text{H}_2\text{O}$  (25 mL) were combined. The  $\text{Zn}(\text{NO}_3)_2 \cdot \text{H}_2\text{O}$  solution was added all at once to the  $\text{H}_4m\text{-dobdc}$  solution. The mixture was stirred at room temperature for 1 h. The reaction mixture was vacuum-filtered, and the resulting solid was rinsed with  $\text{MeOH}$  (100 mL). The resulting beige solid was transferred to a new jar filled with  $\text{MeOH}$  (100 mL). The vial was transferred to an oven that had been pre-heated to 60 °C and was allowed to stand at this temperature for at least 12 h. At this time, the heterogeneous mixture was allowed to cool to room temperature, the solvent was decanted, and fresh  $\text{MeOH}$  (100 mL) was added. This process was repeated for a total of six  $\text{MeOH}$  soaks. After the final soak, the solvent was decanted, and the remaining solid was allowed to dry in air. The sample was activated under high vacuum (<10  $\mu\text{bar}$ ), ramping the temperature slowly to 180 °C (0.1 °C/min). The sample was allowed to stand at 180 °C under high vacuum (<10  $\mu\text{bar}$ ) for 12 h prior to gas adsorption analysis. Activated  $\text{Zn}_2(m\text{-dobdc})$  was obtained in 40% yield.

The high BET surface area obtained for this material confirms that activation using supercritical  $\text{CO}_2$  is unnecessary.

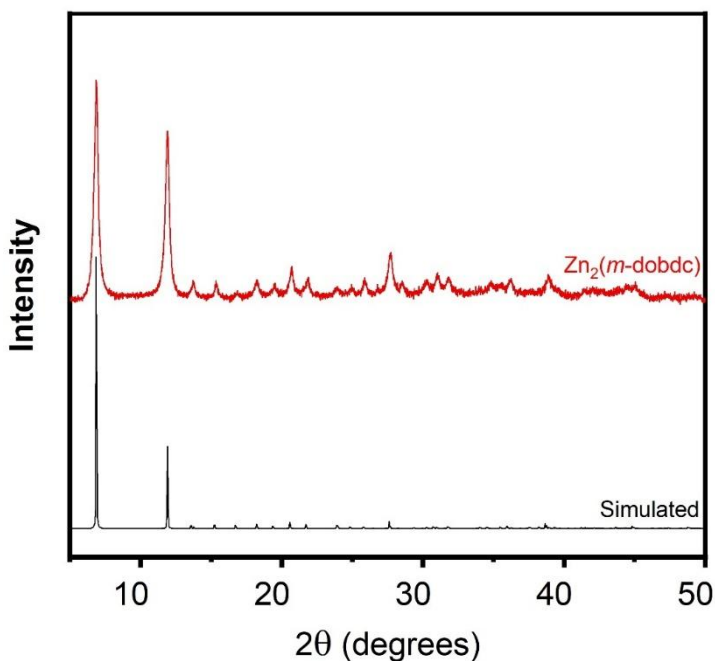

**Figure S156.** PXRD pattern of  $\text{MeOH}$ -solvated  $\text{Zn}_2(m\text{-dobdc})$  after large-scale synthesis. The simulated pattern based on the previously reported SCXRD structure of the isostructural framework  $\text{Co}_2(m\text{-dobdc})$  is included for reference.<sup>14</sup>

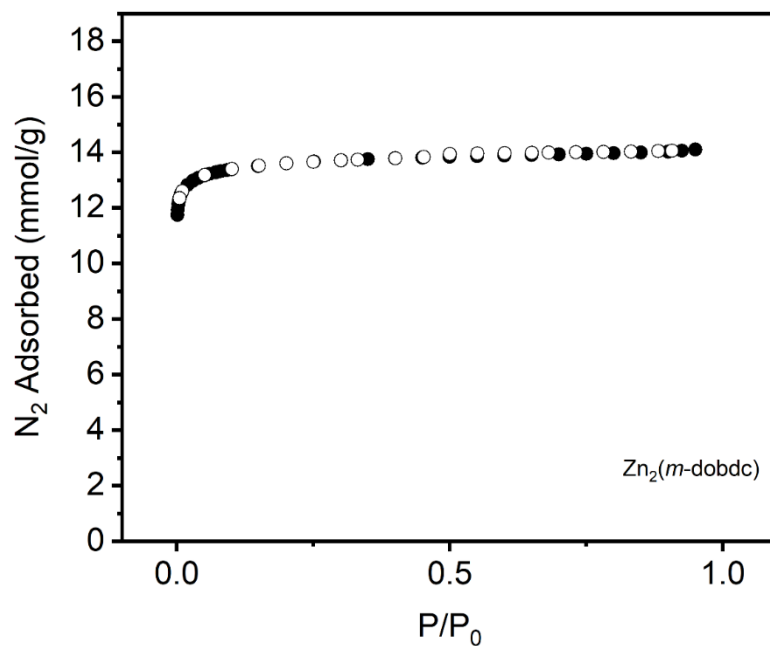

**Figure S157.** 77 K N<sub>2</sub> adsorption (filled circles) and desorption (open circles) isotherms of activated Zn<sub>2</sub>(*m*-dobdc) after large-scale synthesis. The BET surface area determined from these data is  $1228 \pm 1 \text{ m}^2/\text{g}$ , comparable to that obtained on a small scale ( $1216 \pm 1 \text{ m}^2/\text{g}$ ). The Langmuir surface area determined from these data is  $1368 \pm 2 \text{ m}^2/\text{g}$ .

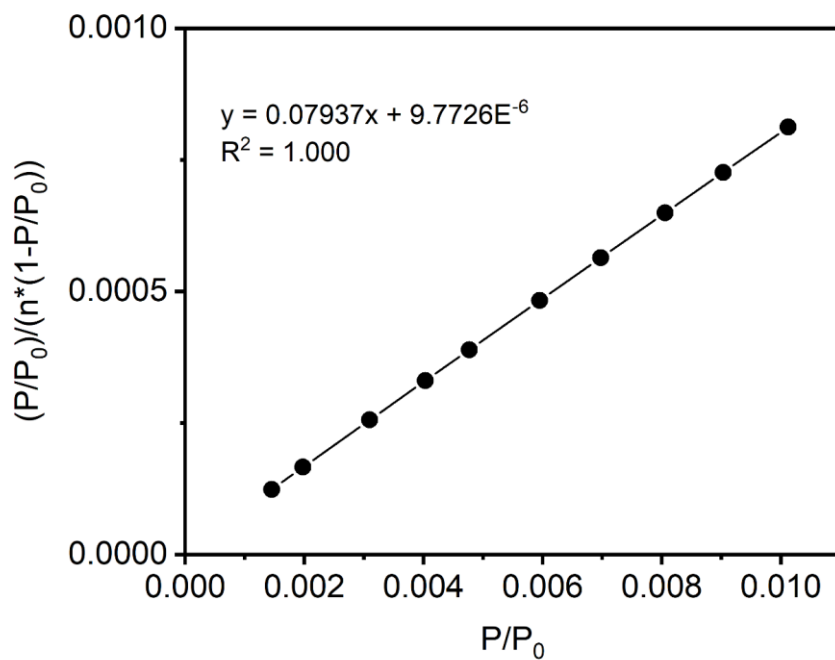

**Figure S158.** Linearized BET plot for the N<sub>2</sub> adsorption data of Zn<sub>2</sub>(*m*-dobdc) after large-scale synthesis.

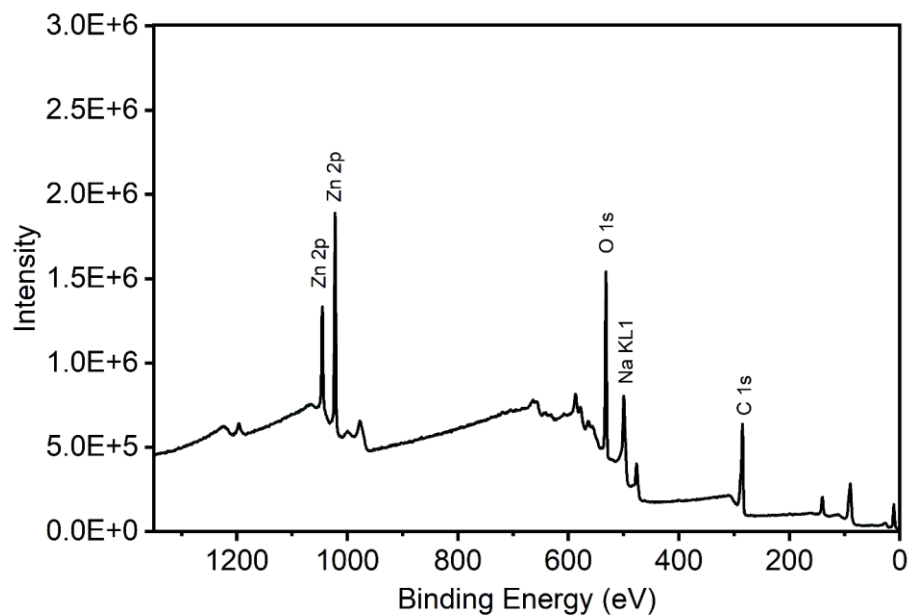

**Figure S159.** XPS survey scan of  $\text{Zn}_2(m\text{-dobdc})$  after large-scale synthesis. The material consists largely of Zn, O, and C, as expected. A small amount of Na was also detected, likely left over from the NaOH used during MOF synthesis.

## 10. References.

- (1) Bruno, N. C.; Tudge, M. T.; Buchwald, S. L. Design and Preparation of New Palladium Precatalysts for C–C and C–N Cross-Coupling Reactions. *Chem. Sci.* **2013**, *4* (3), 916–920. <https://doi.org/10.1039/C2SC20903A>.
- (2) Nelson, A. P.; Farha, O. K.; Mulfort, K. L.; Hupp, J. T. Supercritical Processing as a Route to High Internal Surface Areas and Permanent Microporosity in Metal–Organic Framework Materials. *J. Am. Chem. Soc.* **2009**, *131* (2), 458–460. <https://doi.org/10.1021/ja808853q>.
- (3) Gonzalez, M. I.; Kapelewski, M. T.; Bloch, E. D.; Milner, P. J.; Reed, D. A.; Hudson, M. R.; Mason, J. A.; Barin, G.; Brown, C. M.; Long, J. R. Separation of Xylene Isomers through Multiple Metal Site Interactions in Metal–Organic Frameworks. *J. Am. Chem. Soc.* **2018**, *140* (9), 3412–3422. <https://doi.org/10.1021/jacs.7b13825>.
- (4) Wang, Z.; Bilegsaikhon, A.; Jerozal, R. T.; Pitt, T. A.; Milner, P. J. Evaluating the Robustness of Metal–Organic Frameworks for Synthetic Chemistry. *ACS Appl. Mater. Interfaces* **2021**, *13* (15), 17517–17531. <https://doi.org/10.1021/acsami.1c01329>.
- (5) Xiao, D. J.; Oktawiec, J.; Milner, P. J.; Long, J. R. Pore Environment Effects on Catalytic Cyclohexane Oxidation in Expanded Fe<sub>2</sub>(dobdc) Analogues. *J. Am. Chem. Soc.* **2016**, *138* (43), 14371–14379. <https://doi.org/10.1021/jacs.6b08417>.
- (6) Lundvall, F.; Vajeeston, P.; Wragg, D. S.; Dietzel, P. D. C.; Fjellvåg, H. Two New Series of Coordination Polymers and Evaluation of Their Properties by Density Functional Theory. *Cryst. Growth Des.* **2016**, *16* (1), 339–346. <https://doi.org/10.1021/acs.cgd.5b01302>.
- (7) Gygi, D.; Bloch, E. D.; Mason, J. A.; Hudson, M. R.; Gonzalez, M. I.; Siegelman, R. L.; Darwish, T. A.; Queen, W. L.; Brown, C. M.; Long, J. R. Hydrogen Storage in the Expanded Pore Metal–Organic Frameworks M<sub>2</sub>(dobpdc) (M = Mg, Mn, Fe, Co, Ni, Zn). *Chem. Mater.* **2016**, *28* (4), 1128–1138. <https://doi.org/10.1021/acs.chemmater.5b04538>.
- (8) Keasler, K. T.; Zick, M. E.; Stacy, E. E.; Kim, J.; Lee, J.-H.; Aeindartehran, L.; Runčevski, T.; Milner, P. J. Handling Fluorinated Gases as Solid Reagents Using Metal–Organic Frameworks. *Science* **2023**, *381* (6665), 1455–1461. <https://doi.org/10.1126/science.adg8835>.
- (9) Dietzel, P. D. C.; Johnsen, R. E.; Blom, R.; Fjellvåg, H. Structural Changes and Coordinatively Unsaturated Metal Atoms on Dehydration of Honeycomb Analogous Microporous Metal–Organic Frameworks. *Chem. Eur. J.* **2008**, *14* (8), 2389–2397. <https://doi.org/10.1002/chem.200701370>.
- (10) Sumida, K.; Brown, C. M.; Herm, Z. R.; Chavan, S.; Bordiga, S.; Long, J. R. Hydrogen Storage Properties and Neutron Scattering Studies of Mg<sub>2</sub>(dobdc)—a Metal–Organic Framework with Open Mg<sup>2+</sup> Adsorption Sites. *Chem. Commun.* **2011**, *47* (4), 1157–1159. <https://doi.org/10.1039/C0CC03453C>.
- (11) Sánchez-Sánchez, M.; Getachew, N.; Díaz, K.; Díaz-García, M.; Chebude, Y.; Díaz, I. Synthesis of Metal–Organic Frameworks in Water at Room Temperature: Salts as Linker Sources. *Green Chem.* **2015**, *17* (3), 1500–1509. <https://doi.org/10.1039/C4GC01861C>.
- (12) Kim, H.; Hong, C. S. MOF-74-Type Frameworks: Tunable Pore Environment and Functionality through Metal and Ligand Modification. *CrystEngComm* **2021**, *23* (6), 1377–1387. <https://doi.org/10.1039/D0CE01870H>.
- (13) Siegelman, R. L.; McDonald, T. M.; Gonzalez, M. I.; Martell, J. D.; Milner, P. J.; Mason, J. A.; Berger, A. H.; Bhowan, A. S.; Long, J. R. Controlling Cooperative CO<sub>2</sub> Adsorption in Diamine-Appended Mg<sub>2</sub>(dobpdc) Metal–Organic Frameworks. *J. Am. Chem. Soc.* **2017**, *139* (30), 10526–10538. <https://doi.org/10.1021/jacs.7b05858>.

- (14) Bachman, J. E.; Kapelewski, M. T.; Reed, D. A.; Gonzalez, M. I.; Long, J. R.  $M_2(m\text{-dobdc})$  ( $M = \text{Mn, Fe, Co, Ni}$ ) Metal–Organic Frameworks as Highly Selective, High-Capacity Adsorbents for Olefin/Paraffin Separations. *J. Am. Chem. Soc.* **2017**, *139* (43), 15363–15370. <https://doi.org/10.1021/jacs.7b06397>.
- (15) Chen, E. Y.; Mandel, R. M.; Milner, P. J. Evaluating Solvothermal and Mechanochemical Routes towards the Metal–Organic Framework  $Mg_2(m\text{-dobdc})$ . *CrystEngComm* **2022**, *24* (41), 7292–7297. <https://doi.org/10.1039/D2CE00739H>.
- (16) Kapelewski, M. T.; Geier, S. J.; Hudson, M. R.; Stück, D.; Mason, J. A.; Nelson, J. N.; Xiao, D. J.; Hulvey, Z.; Gilmour, E.; FitzGerald, S. A.; Head-Gordon, M.; Brown, C. M.; Long, J. R.  $M_2(m\text{-dobdc})$  ( $M = \text{Mg, Mn, Fe, Co, Ni}$ ) Metal–Organic Frameworks Exhibiting Increased Charge Density and Enhanced  $H_2$  Binding at the Open Metal Sites. *J. Am. Chem. Soc.* **2014**, *136* (34), 12119–12129. <https://doi.org/10.1021/ja506230r>.
- (17) Caskey, S. R.; Wong-Foy, A. G.; Matzger, A. J. Dramatic Tuning of Carbon Dioxide Uptake via Metal Substitution in a Coordination Polymer with Cylindrical Pores. *J. Am. Chem. Soc.* **2008**, *130* (33), 10870–10871. <https://doi.org/10.1021/ja8036096>.
- (18) Forse, A. C.; Colwell, K. A.; Gonzalez, M. I.; Benders, S.; Torres-Gavosto, R. M.; Blümich, B.; Reimer, J. A.; Long, J. R. Influence of Pore Size on Carbon Dioxide Diffusion in Two Isoreticular Metal–Organic Frameworks. *Chem. Mater.* **2020**, *32* (8), 3570–3576. <https://doi.org/10.1021/acs.chemmater.0c00745>.
- (19) Forse, A. C.; Gonzalez, M. I.; Siegelman, R. L.; Witherspoon, V. J.; Jawahery, S.; Mercado, R.; Milner, P. J.; Martell, J. D.; Smit, B.; Blümich, B.; Long, J. R.; Reimer, J. A. Unexpected Diffusion Anisotropy of Carbon Dioxide in the Metal–Organic Framework  $Zn_2(\text{dobpdc})$ . *J. Am. Chem. Soc.* **2018**, *140* (5), 1663–1673. <https://doi.org/10.1021/jacs.7b09453>.
- (20) Myers, A. L.; Prausnitz, J. M. Thermodynamics of Mixed-Gas Adsorption. *AIChE J.* **1965**, *11* (1), 121–127. <https://doi.org/10.1002/aic.690110125>.
- (21) Jerozal, R. T.; Kim, J.; Ma, C.; Pitt, T. A.; Lee, J.-H.; Milner, P. J. Enhancing Selective Hydrofluorocarbon Greenhouse Gas Capture via Halogenation of Metal–Organic Frameworks. *J. Am. Chem. Soc.* **2025**, *147* (8), 7127–7136. <https://doi.org/10.1021/jacs.5c00393>.
- (22) Zick, M. E.; Lee, J.-H.; Gonzalez, M. I.; Velasquez, E. O.; Uliana, A. A.; Kim, J.; Long, J. R.; Milner, P. J. Fluoroarene Separations in Metal–Organic Frameworks with Two Proximal  $Mg^{2+}$  Coordination Sites. *J. Am. Chem. Soc.* **2021**, *143* (4), 1948–1958. <https://doi.org/10.1021/jacs.0c11530>.
- (23) McDonald, T. M.; Mason, J. A.; Kong, X.; Bloch, E. D.; Gygi, D.; Dani, A.; Crocellà, V.; Giordanino, F.; Odoh, S. O.; Drisdell, W. S.; Vlasisavljevich, B.; Dzubak, A. L.; Poloni, R.; Schnell, S. K.; Planas, N.; Lee, K.; Pascal, T.; Wan, L. F.; Prendergast, D.; Neaton, J. B.; Smit, B.; Kortright, J. B.; Gagliardi, L.; Bordiga, S.; Reimer, J. A.; Long, J. R. Cooperative Insertion of  $CO_2$  in Diamine-Appended Metal–Organic Frameworks. *Nature* **2015**, *519* (7543), 303–308. <https://doi.org/10.1038/nature14327>.
- (24) Halder, A.; Bain, D. C.; Pitt, T. A.; Shi, Z.; Oktawiec, J.; Lee, J.-H.; Tsangari, S.; Ng, M.; Fuentes-Rivera, J. J.; Forse, A. C.; Runcevski, T.; Muller, D. A.; Musser, A. J.; Milner, P. J. Kinetic Trapping of Photoluminescent Frameworks During High-Concentration Synthesis of Nonemissive Metal–Organic Frameworks. *Chem. Mater.* **2023**, *35* (23), 10086–10098. <https://doi.org/10.1021/acs.chemmater.3c02121>.



- (25) Pitt, T. A.; Bain, D. C.; Del Campo, M.; Musser, A. J.; Milner, P. J. Controlled Growth and Interconversion of Photoluminescent Metal-Organic Frameworks under High-Concentration Conditions. *Chem. Mater.* **2025**, 37 (8), 2964–2975. <https://doi.org/10.1021/acs.chemmater.5c00355>.
